# Supplementary material for: Mechanistic insight into benzylidene-directed glycosylation reactions using cryogenic infrared spectroscopy
Source: PubMed Central journal article supplement (PMC11549046; doi:10.1038/s44160-024-00619-0), 2024-07-26
Supplement: 44160_2024_619_MOESM2_ESM.pdf [file 44160_2024_619_MOESM2_ESM.pdf]

Glc-oxo/conf\_1.out

Charge=+1, Multiplicity=+1

|   |             |             |             |
|---|-------------|-------------|-------------|
| C | 1.15699200  | -1.32277700 | -0.80518400 |
| O | 0.31625200  | -1.82241300 | 0.29629400  |
| C | -0.73143900 | -1.16807800 | 0.55006100  |
| H | -1.25432300 | -1.48201100 | 1.45314500  |
| C | -1.11008300 | 0.02268000  | -0.28383300 |
| C | 0.11372000  | 0.95300100  | -0.51308500 |
| O | 0.21338100  | 1.93843800  | 0.47058400  |
| C | -0.47692200 | 3.15871600  | 0.17691700  |
| C | -1.97138600 | 2.99656700  | 0.15019800  |
| C | -2.66594900 | 2.98092500  | -1.05752800 |
| C | -4.03800200 | 2.74645100  | -1.08183700 |
| C | -4.72546000 | 2.52322100  | 0.10546900  |
| C | -4.04082200 | 2.54866800  | 1.31883800  |
| C | -2.67294600 | 2.78736200  | 1.34009300  |
| H | -2.14041000 | 2.81454900  | 2.28653700  |
| H | -4.57929300 | 2.40239700  | 2.24944500  |
| H | -5.79693000 | 2.35307200  | 0.08924200  |
| H | -4.57090700 | 2.75135900  | -2.02691800 |
| H | -2.13248100 | 3.15845300  | -1.98712300 |
| H | -0.16902400 | 3.84151300  | 0.97020500  |
| H | -0.11474300 | 3.55326900  | -0.77995300 |
| H | -0.03694800 | 1.37759400  | -1.51411600 |
| C | 1.40234800  | 0.15191900  | -0.51047700 |
| O | 2.28940900  | 0.65458500  | -1.46974800 |
| C | 3.51911100  | -0.05454700 | -1.49048200 |
| C | 4.34891800  | 0.18785500  | -0.24716200 |
| C | 4.21296800  | 1.37225500  | 0.47443000  |
| C | 5.02220100  | 1.61379200  | 1.57791100  |
| C | 5.97639900  | 0.67905100  | 1.96225700  |
| C | 6.12468600  | -0.49665200 | 1.23523400  |
| C | 5.31628400  | -0.74102800 | 0.13223400  |
| H | 5.44095900  | -1.65151700 | -0.44481700 |
| H | 6.87679700  | -1.22316000 | 1.52309100  |
| H | 6.61000400  | 0.87039300  | 2.82141400  |
| H | 4.91131000  | 2.53801200  | 2.13468500  |
| H | 3.47605700  | 2.10724200  | 0.16797200  |

|   |             |             |             |
|---|-------------|-------------|-------------|
| O | 3.29923200  | -1.42281000 | -1.74839800 |
| C | 2.47930900  | -2.05952900 | -0.79358500 |
| H | 2.37625200  | -3.09943700 | -1.10499900 |
| H | 2.91832000  | -2.02278300 | 0.21231300  |
| H | 4.03254700  | 0.31566600  | -2.37909100 |
| H | 1.83506500  | 0.21947800  | 0.50067400  |
| O | -1.52191900 | -0.45613800 | -1.54645600 |
| C | -2.88222600 | -0.91604200 | -1.53240900 |
| C | -3.10405900 | -1.89346000 | -0.41820500 |
| C | -2.49223000 | -3.15471200 | -0.45537200 |
| C | -2.61124700 | -4.02665400 | 0.62041900  |
| C | -3.34485600 | -3.64831800 | 1.73985400  |
| C | -3.97314200 | -2.40421100 | 1.77854700  |
| C | -3.85863700 | -1.53355900 | 0.70335800  |
| H | -4.34371300 | -0.56192800 | 0.73060100  |
| H | -4.55627400 | -2.11877400 | 2.64729700  |
| H | -3.44057200 | -4.32831300 | 2.57933400  |
| H | -2.14206900 | -5.00348800 | 0.58156500  |
| H | -1.92927900 | -3.44918000 | -1.33668900 |
| H | -3.54661400 | -0.05127100 | -1.42769300 |
| H | -3.03199400 | -1.36936400 | -2.51366500 |
| H | -1.90304100 | 0.57781900  | 0.22074500  |
| H | 0.59928500  | -1.47026300 | -1.73137500 |

Glc-oxo/struc2.out

Charge=+1, Multiplicity=+1

|   |          |          |          |
|---|----------|----------|----------|
| C | -0.23137 | 0.48002  | 1.42257  |
| C | -1.06152 | 0.36042  | 0.14974  |
| C | -0.58652 | -0.80581 | -0.71210 |
| H | -0.93565 | 1.26505  | -0.46754 |
| O | -2.41110 | 0.17575  | 0.45436  |
| O | 0.79391  | -0.50308 | -1.10524 |
| H | -0.57664 | -1.74257 | -0.15393 |
| C | -1.45415 | -0.88787 | -1.95062 |
| C | 1.59036  | -0.17747 | -0.17509 |
| C | 1.13216  | -0.25211 | 1.24963  |
| H | 1.87260  | 0.20955  | 1.90576  |
| O | 0.91799  | -1.60906 | 1.57181  |

|   |          |          |          |
|---|----------|----------|----------|
| H | -0.74069 | -0.09154 | 2.20370  |
| O | -0.07786 | 1.76730  | 1.94294  |
| H | 2.57313  | 0.15608  | -0.50265 |
| O | -2.78322 | -1.00849 | -1.50849 |
| H | -1.22801 | -1.76542 | -2.55742 |
| H | -1.31680 | 0.01535  | -2.56550 |
| C | -3.19991 | 0.08778  | -0.72706 |
| C | -4.63009 | -0.08617 | -0.34261 |
| H | -3.05168 | 1.01490  | -1.30722 |
| C | -5.55929 | 0.89354  | -0.67142 |
| C | -6.89239 | 0.73754  | -0.30981 |
| C | -7.29290 | -0.39914 | 0.38033  |
| C | -6.36214 | -1.38070 | 0.70928  |
| C | -5.03179 | -1.22645 | 0.34944  |
| H | -5.24449 | 1.78064  | -1.21327 |
| H | -7.61656 | 1.50204  | -0.56845 |
| H | -8.33286 | -0.52315 | 0.66231  |
| H | -6.67732 | -2.26839 | 1.24672  |
| H | -4.30277 | -1.98903 | 0.59980  |
| C | 2.13374  | -2.30241 | 1.89184  |
| C | 3.15642  | -2.15660 | 0.80517  |
| H | 1.82779  | -3.34066 | 2.02978  |
| H | 2.52259  | -1.92073 | 2.84292  |
| C | 4.30245  | -1.38155 | 1.00307  |
| C | 5.20266  | -1.18005 | -0.03474 |
| C | 4.96872  | -1.75564 | -1.28016 |
| C | 3.84267  | -2.54835 | -1.48281 |
| C | 2.94434  | -2.75289 | -0.44446 |
| H | 4.48680  | -0.93727 | 1.97693  |
| H | 6.09184  | -0.58078 | 0.12790  |
| H | 5.67430  | -1.60148 | -2.08935 |
| H | 3.67380  | -3.01667 | -2.44619 |
| H | 2.07004  | -3.37966 | -0.59603 |
| C | 0.24464  | 2.83736  | 1.06492  |
| C | 1.53205  | 2.64708  | 0.30402  |
| H | 0.32520  | 3.70201  | 1.72686  |
| H | -0.58021 | 3.04253  | 0.37308  |
| C | 1.55574  | 2.67886  | -1.09263 |

|   |         |         |          |
|---|---------|---------|----------|
| C | 2.74267 | 2.50234 | 0.99474  |
| C | 3.93685 | 2.36359 | 0.30295  |
| C | 3.94447 | 2.38549 | -1.09147 |
| C | 2.75434 | 2.55391 | -1.78878 |
| H | 0.62824 | 2.81917 | -1.64120 |
| H | 2.73932 | 2.51916 | 2.08087  |
| H | 4.86866 | 2.26126 | 0.84854  |
| H | 4.88076 | 2.29049 | -1.63049 |
| H | 2.75767 | 2.59154 | -2.87254 |

Glc-oxo/struc3.out

Charge=+1, Multiplicity=+1

|   |          |          |          |
|---|----------|----------|----------|
| C | -0.68860 | 0.80553  | -1.18575 |
| C | 0.09542  | 0.18136  | -0.02850 |
| C | -0.72285 | -0.83857 | 0.75238  |
| H | 0.35484  | 0.99546  | 0.66668  |
| O | 1.25129  | -0.46529 | -0.47137 |
| O | -1.92548 | -0.13495 | 1.22646  |
| H | -1.05691 | -1.65805 | 0.11563  |
| C | 0.09994  | -1.32439 | 1.92811  |
| C | -2.61190 | 0.45936  | 0.35124  |
| C | -2.18430 | 0.44406  | -1.09457 |
| H | -2.75829 | 1.19283  | -1.64914 |
| O | -2.35927 | -0.85198 | -1.61040 |
| H | -0.32450 | 0.37814  | -2.13024 |
| O | -0.65731 | 2.20409  | -1.19009 |
| H | -3.42970 | 1.05996  | 0.74724  |
| O | 1.28491  | -1.85655 | 1.38557  |
| H | -0.39407 | -2.12371 | 2.48192  |
| H | 0.30926  | -0.48748 | 2.61145  |
| C | 2.01888  | -0.90579 | 0.63715  |
| C | 3.28619  | -1.52819 | 0.15401  |
| H | 2.22637  | -0.03234 | 1.27686  |
| C | 3.29941  | -2.32437 | -0.98756 |
| C | 4.48681  | -2.90845 | -1.40757 |
| C | 5.65928  | -2.70328 | -0.68755 |
| C | 5.64505  | -1.91156 | 0.45481  |
| C | 4.45865  | -1.32267 | 0.87361  |

|   |          |          |          |
|---|----------|----------|----------|
| H | 2.38323  | -2.47829 | -1.54626 |
| H | 4.49890  | -3.52704 | -2.29839 |
| H | 6.58536  | -3.16112 | -1.01804 |
| H | 6.55789  | -1.75160 | 1.01813  |
| H | 4.44358  | -0.69973 | 1.76304  |
| C | -3.73291 | -1.13483 | -1.90971 |
| C | -4.61448 | -0.86458 | -0.72689 |
| H | -3.74281 | -2.18789 | -2.19517 |
| H | -4.04539 | -0.53268 | -2.77057 |
| C | -4.52044 | -1.66742 | 0.41931  |
| C | -5.28676 | -1.38450 | 1.54193  |
| C | -6.16474 | -0.30493 | 1.52749  |
| C | -6.28597 | 0.48542  | 0.38616  |
| C | -5.51960 | 0.20404  | -0.73631 |
| H | -3.84499 | -2.51848 | 0.42033  |
| H | -5.21146 | -2.01267 | 2.42253  |
| H | -6.76826 | -0.08702 | 2.40188  |
| H | -6.98501 | 1.31430  | 0.37116  |
| H | -5.62160 | 0.81206  | -1.63055 |
| C | 0.57126  | 2.79216  | -1.63784 |
| C | 1.66111  | 2.79491  | -0.60076 |
| H | 0.29422  | 3.81333  | -1.90821 |
| H | 0.90830  | 2.27730  | -2.54583 |
| C | 2.87882  | 2.16787  | -0.84653 |
| C | 1.45802  | 3.43298  | 0.62513  |
| C | 2.45262  | 3.42715  | 1.59335  |
| C | 3.66857  | 2.79608  | 1.33922  |
| C | 3.88290  | 2.17272  | 0.11664  |
| H | 3.04335  | 1.66131  | -1.79238 |
| H | 0.51543  | 3.93790  | 0.81723  |
| H | 2.28917  | 3.92933  | 2.54103  |
| H | 4.45043  | 2.80272  | 2.09136  |
| H | 4.82695  | 1.68014  | -0.08878 |

Glc-oxo/struc4.out

Charge=+1, Multiplicity=+1

|   |          |          |          |
|---|----------|----------|----------|
| C | -0.09732 | -0.76488 | -1.59065 |
| C | -1.01952 | -0.78602 | -0.38368 |

|   |          |          |          |
|---|----------|----------|----------|
| C | -0.87936 | 0.49566  | 0.43180  |
| H | -0.72172 | -1.59837 | 0.29006  |
| O | -2.35644 | -0.91567 | -0.75365 |
| O | 0.48879  | 0.45028  | 0.99034  |
| H | -0.92871 | 1.39269  | -0.18609 |
| C | -1.91698 | 0.46940  | 1.54569  |
| C | 1.41751  | 0.22483  | 0.16042  |
| C | 1.10923  | 0.18168  | -1.30808 |
| H | 1.97992  | -0.17671 | -1.86023 |
| O | 0.72918  | 1.47894  | -1.71511 |
| H | -0.62083 | -0.28679 | -2.42358 |
| O | 0.31415  | -2.01071 | -2.07004 |
| H | 2.40167  | 0.06221  | 0.59630  |
| O | -2.52976 | -0.80145 | 1.57599  |
| H | -2.66205 | 1.25453  | 1.37738  |
| H | -1.45012 | 0.62499  | 2.51929  |
| C | -3.22078 | -1.08458 | 0.37808  |
| C | -4.44771 | -0.22705 | 0.20114  |
| H | -3.48108 | -2.14475 | 0.46139  |
| C | -4.68629 | 0.49579  | -0.96335 |
| C | -5.83786 | 1.26842  | -1.07642 |
| C | -6.75006 | 1.32082  | -0.03081 |
| C | -6.51427 | 0.59454  | 1.13293  |
| C | -5.36907 | -0.17982 | 1.24788  |
| H | -3.97749 | 0.44453  | -1.78081 |
| H | -6.02319 | 1.82712  | -1.98746 |
| H | -7.64803 | 1.92216  | -0.12234 |
| H | -7.22695 | 0.62911  | 1.94968  |
| H | -5.18190 | -0.74567 | 2.15521  |
| C | 1.85375  | 2.34038  | -1.94949 |
| C | 2.76677  | 2.39520  | -0.76159 |
| H | 1.41122  | 3.31288  | -2.17093 |
| H | 2.39336  | 1.98906  | -2.83652 |
| C | 2.33746  | 2.99765  | 0.42764  |
| C | 3.14156  | 2.97249  | 1.55883  |
| C | 4.38829  | 2.35531  | 1.51057  |
| C | 4.83519  | 1.77612  | 0.32673  |
| C | 4.02944  | 1.79818  | -0.80405 |

|   |          |          |          |
|---|----------|----------|----------|
| H | 1.36801  | 3.48685  | 0.45929  |
| H | 2.80382  | 3.44429  | 2.47496  |
| H | 5.01936  | 2.34129  | 2.39258  |
| H | 5.81544  | 1.31404  | 0.28467  |
| H | 4.37933  | 1.35041  | -1.72971 |
| C | 0.71350  | -3.00899 | -1.13800 |
| C | 1.86419  | -2.60319 | -0.25153 |
| H | 1.00535  | -3.85126 | -1.76843 |
| H | -0.13609 | -3.34258 | -0.53160 |
| C | 3.10542  | -2.27850 | -0.81445 |
| C | 1.73762  | -2.60391 | 1.14019  |
| C | 2.81821  | -2.27663 | 1.95427  |
| C | 4.03698  | -1.93379 | 1.38184  |
| C | 4.17957  | -1.93827 | -0.00540 |
| H | 3.22478  | -2.31496 | -1.89358 |
| H | 0.78863  | -2.87818 | 1.59334  |
| H | 2.70699  | -2.29324 | 3.03285  |
| H | 4.88180  | -1.68136 | 2.01340  |
| H | 5.13822  | -1.69849 | -0.45258 |

Glc-oxo/struc5.out

Charge=+1, Multiplicity=+1

|   |          |          |          |
|---|----------|----------|----------|
| C | -1.01996 | -0.75539 | 0.59325  |
| C | 0.25913  | -1.57254 | 0.63564  |
| C | 0.20458  | -2.76388 | -0.30493 |
| H | 0.39072  | -1.94854 | 1.66748  |
| O | 1.34101  | -0.78258 | 0.25399  |
| O | -0.87687 | -3.67604 | 0.12313  |
| H | -0.05128 | -2.46654 | -1.32479 |
| C | 1.52513  | -3.51032 | -0.25629 |
| C | -1.94968 | -3.15779 | 0.52559  |
| C | -2.22418 | -1.70105 | 0.49043  |
| H | -2.98012 | -1.40763 | 1.22198  |
| O | -2.76160 | -1.84746 | -0.82531 |
| H | -1.00234 | -0.13772 | -0.31271 |
| O | -1.12476 | 0.00628  | 1.75652  |
| H | -2.72844 | -3.87409 | 0.78634  |
| O | 2.53261  | -2.58579 | -0.57805 |

|   |          |          |          |
|---|----------|----------|----------|
| H | 1.56794  | -4.31594 | -0.99007 |
| H | 1.67448  | -3.93313 | 0.74929  |
| C | 2.56772  | -1.49392 | 0.31388  |
| C | 3.66730  | -0.55959 | -0.06501 |
| H | 2.69880  | -1.87378 | 1.34087  |
| C | 4.56728  | -0.12520 | 0.90046  |
| C | 5.56477  | 0.78250  | 0.56366  |
| C | 5.66041  | 1.25251  | -0.74022 |
| C | 4.76036  | 0.81425  | -1.70748 |
| C | 3.76255  | -0.08852 | -1.37155 |
| H | 4.49083  | -0.49475 | 1.91888  |
| H | 6.26983  | 1.11664  | 1.31698  |
| H | 6.44212  | 1.95604  | -1.00640 |
| H | 4.83965  | 1.17763  | -2.72643 |
| H | 3.05737  | -0.43204 | -2.11985 |
| C | -4.14855 | -1.42863 | -0.98651 |
| C | -4.29899 | 0.03113  | -0.71520 |
| H | -4.78481 | -2.02900 | -0.32825 |
| H | -4.36792 | -1.68862 | -2.02242 |
| C | -4.93183 | 0.47807  | 0.44455  |
| C | -5.05570 | 1.83974  | 0.69776  |
| C | -4.54558 | 2.76096  | -0.20855 |
| C | -3.91427 | 2.32229  | -1.37034 |
| C | -3.78983 | 0.96433  | -1.62271 |
| H | -5.35268 | -0.23988 | 1.14352  |
| H | -5.55704 | 2.17984  | 1.59700  |
| H | -4.64677 | 3.82348  | -0.01634 |
| H | -3.53161 | 3.04374  | -2.08416 |
| H | -3.30791 | 0.62221  | -2.53397 |
| C | -1.28554 | 1.42566  | 1.54968  |
| C | -0.08597 | 2.04143  | 0.89838  |
| H | -1.44344 | 1.81738  | 2.55551  |
| H | -2.19109 | 1.60878  | 0.96083  |
| C | 1.10851  | 2.16844  | 1.60793  |
| C | -0.12718 | 2.43574  | -0.43692 |
| C | 1.00980  | 2.93915  | -1.06066 |
| C | 2.19646  | 3.05055  | -0.34879 |
| C | 2.24318  | 2.66921  | 0.98899  |



|   |          |         |          |
|---|----------|---------|----------|
| H | 1.14691  | 1.86294 | 2.64950  |
| H | -1.06093 | 2.35868 | -0.98754 |
| H | 0.96791  | 3.24631 | -2.10037 |
| H | 3.08733  | 3.43650 | -0.83147 |
| H | 3.16992  | 2.76136 | 1.54424  |

Glc-oxo/struc6.out

Charge=+1, Multiplicity=+1

|   |          |          |          |
|---|----------|----------|----------|
| C | 1.68552  | -0.94713 | -0.59706 |
| C | 0.31226  | -1.42566 | -1.06969 |
| C | -0.11475 | -2.71395 | -0.37392 |
| H | 0.38512  | -1.63912 | -2.15112 |
| O | -0.68010 | -0.47558 | -0.81816 |
| O | 0.95757  | -3.70519 | -0.61143 |
| H | -0.17242 | -2.57096 | 0.70510  |
| C | -1.43494 | -3.17868 | -0.94447 |
| C | 2.12530  | -3.34793 | -0.34304 |
| C | 2.38908  | -2.01129 | 0.27746  |
| H | 3.46284  | -1.79525 | 0.27356  |
| O | 1.88669  | -2.19907 | 1.57301  |
| H | 1.55126  | -0.04252 | 0.00325  |
| O | 2.57117  | -0.73619 | -1.66370 |
| H | 2.89263  | -4.08665 | -0.57855 |
| O | -2.32732 | -2.12256 | -0.67455 |
| H | -1.81964 | -4.06803 | -0.44449 |
| H | -1.35335 | -3.37413 | -2.02377 |
| C | -1.95205 | -0.91340 | -1.28108 |
| C | -2.94875 | 0.15625  | -0.94949 |
| H | -1.87022 | -1.08077 | -2.37044 |
| C | -2.64463 | 1.47723  | -1.26919 |
| C | -3.53571 | 2.49266  | -0.95373 |
| C | -4.73626 | 2.19200  | -0.31765 |
| C | -5.04269 | 0.87293  | -0.00690 |
| C | -4.15190 | -0.14711 | -0.32306 |
| H | -1.70132 | 1.71044  | -1.75042 |
| H | -3.29614 | 3.52026  | -1.20530 |
| H | -5.43456 | 2.98482  | -0.07217 |
| H | -5.98068 | 0.63396  | 0.48245  |

|   |          |          |          |
|---|----------|----------|----------|
| H | -4.38649 | -1.17574 | -0.07869 |
| C | 1.92500  | -1.04288 | 2.45312  |
| C | 0.64628  | -0.26614 | 2.39929  |
| H | 2.78935  | -0.41934 | 2.20102  |
| H | 2.09009  | -1.48254 | 3.43869  |
| C | 0.62968  | 1.06864  | 2.00095  |
| C | -0.57500 | 1.75332  | 1.90124  |
| C | -1.77102 | 1.10801  | 2.18785  |
| C | -1.76038 | -0.21862 | 2.60545  |
| C | -0.55697 | -0.89929 | 2.72100  |
| H | 1.55925  | 1.57727  | 1.75675  |
| H | -0.57860 | 2.78939  | 1.58185  |
| H | -2.71301 | 1.63480  | 2.08052  |
| H | -2.69237 | -0.72004 | 2.84188  |
| H | -0.54737 | -1.92887 | 3.06989  |
| C | 2.38426  | 0.52099  | -2.32603 |
| C | 2.51788  | 1.68502  | -1.38498 |
| H | 1.40584  | 0.54528  | -2.82236 |
| H | 3.15573  | 0.53699  | -3.09812 |
| C | 3.66519  | 1.82308  | -0.60008 |
| C | 1.50269  | 2.63072  | -1.27490 |
| C | 1.63238  | 3.70928  | -0.40618 |
| C | 2.77250  | 3.83654  | 0.37652  |
| C | 3.78954  | 2.88900  | 0.28000  |
| H | 4.46587  | 1.09450  | -0.68951 |
| H | 0.60545  | 2.52527  | -1.87703 |
| H | 0.84143  | 4.44873  | -0.33985 |
| H | 2.87539  | 4.67543  | 1.05627  |
| H | 4.68681  | 2.99411  | 0.88057  |

Glc-oxo/struc7.out

Charge=+1, Multiplicity=+1

|   |          |          |          |
|---|----------|----------|----------|
| C | 1.72027  | -0.83328 | -0.69547 |
| C | 0.37764  | -1.39945 | -1.12990 |
| C | 0.02824  | -2.68901 | -0.39634 |
| H | 0.44860  | -1.62919 | -2.20747 |
| O | -0.65013 | -0.49031 | -0.87994 |
| O | 1.12914  | -3.63962 | -0.65956 |

|   |          |          |          |
|---|----------|----------|----------|
| H | 0.00123  | -2.53269 | 0.68281  |
| C | -1.28857 | -3.22034 | -0.91780 |
| C | 2.29146  | -3.22859 | -0.45550 |
| C | 2.53323  | -1.87065 | 0.12686  |
| H | 3.59926  | -1.62293 | 0.06432  |
| O | 2.12608  | -2.07916 | 1.45638  |
| H | 1.53333  | 0.03391  | -0.05668 |
| O | 2.43375  | -0.48234 | -1.84948 |
| H | 3.07542  | -3.94468 | -0.70681 |
| O | -2.21959 | -2.19857 | -0.65080 |
| H | -1.61976 | -4.11271 | -0.38588 |
| H | -1.22528 | -3.44046 | -1.99376 |
| C | -1.91079 | -0.98986 | -1.29869 |
| C | -2.94431 | 0.04316  | -0.96213 |
| H | -1.85156 | -1.18334 | -2.38505 |
| C | -2.64862 | 1.38852  | -1.16916 |
| C | -3.58494 | 2.36176  | -0.85025 |
| C | -4.81989 | 1.99603  | -0.32415 |
| C | -5.11602 | 0.65312  | -0.12505 |
| C | -4.18115 | -0.32524 | -0.44471 |
| H | -1.67677 | 1.67105  | -1.55761 |
| H | -3.35240 | 3.40909  | -1.01158 |
| H | -5.55185 | 2.75689  | -0.07554 |
| H | -6.07925 | 0.36331  | 0.28061  |
| H | -4.40642 | -1.37225 | -0.28283 |
| C | 2.06892  | -0.91108 | 2.32094  |
| C | 0.70088  | -0.30186 | 2.34338  |
| H | 2.82907  | -0.18563 | 2.01174  |
| H | 2.34969  | -1.31047 | 3.29758  |
| C | -0.39481 | -1.07850 | 2.72945  |
| C | -1.67854 | -0.55223 | 2.68232  |
| C | -1.87698 | 0.76174  | 2.27178  |
| C | -0.78729 | 1.55064  | 1.92597  |
| C | 0.49596  | 1.02056  | 1.95616  |
| H | -0.23851 | -2.09763 | 3.07445  |
| H | -2.52622 | -1.16511 | 2.96842  |
| H | -2.88111 | 1.16796  | 2.21616  |
| H | -0.93679 | 2.57713  | 1.61057  |

|   |         |         |          |
|---|---------|---------|----------|
| H | 1.33986 | 1.64053 | 1.66556  |
| C | 3.39023 | 0.56803 | -1.67528 |
| C | 2.80898 | 1.80445 | -1.04848 |
| H | 3.75277 | 0.76582 | -2.68631 |
| H | 4.24623 | 0.21805 | -1.08234 |
| C | 1.60739 | 2.33811 | -1.51737 |
| C | 3.46931 | 2.43587 | 0.00334  |
| C | 2.94593 | 3.59180 | 0.57439  |
| C | 1.74527 | 4.11252 | 0.10737  |
| C | 1.07627 | 3.48156 | -0.93771 |
| H | 1.08885 | 1.85022 | -2.33677 |
| H | 4.40809 | 2.03028 | 0.37157  |
| H | 3.47389 | 4.08206 | 1.38511  |
| H | 1.33396 | 5.01198 | 0.55259  |
| H | 0.14333 | 3.89206 | -1.30947 |

Glc-oxo/struc8.out

Charge=+1, Multiplicity=+1

|   |          |          |          |
|---|----------|----------|----------|
| C | -1.04703 | -0.74104 | 0.98018  |
| C | -0.21894 | -1.39116 | -0.13635 |
| C | 0.73229  | -0.40892 | -0.81482 |
| H | -0.90279 | -1.79118 | -0.89668 |
| O | 0.56503  | -2.42885 | 0.39465  |
| O | 0.00478  | 0.79731  | -1.18212 |
| H | 1.49683  | -0.10001 | -0.10438 |
| C | 1.32936  | -1.07020 | -2.03885 |
| C | -0.58493 | 1.38254  | -0.21949 |
| C | -0.65903 | 0.76980  | 1.14969  |
| H | -1.43707 | 1.29245  | 1.72089  |
| O | 0.55609  | 0.73600  | 1.84528  |
| H | -0.75918 | -1.20389 | 1.92615  |
| O | -2.42150 | -0.90764 | 0.86572  |
| H | -1.18419 | 2.23606  | -0.52213 |
| O | 1.38462  | -2.46712 | -1.78933 |
| H | 2.32034  | -0.66564 | -2.26657 |
| H | 0.67582  | -0.93655 | -2.90448 |
| C | 1.65966  | -2.79560 | -0.45217 |
| C | 2.95569  | -2.18479 | 0.04739  |

|   |          |          |          |
|---|----------|----------|----------|
| H | 1.70454  | -3.88594 | -0.42839 |
| C | 3.06405  | -1.67080 | 1.33775  |
| C | 4.26460  | -1.11539 | 1.76836  |
| C | 5.36144  | -1.07101 | 0.91520  |
| C | 5.26035  | -1.59892 | -0.36833 |
| C | 4.06462  | -2.15961 | -0.79871 |
| H | 2.20750  | -1.70656 | 2.00028  |
| H | 4.34707  | -0.72968 | 2.77938  |
| H | 6.29836  | -0.64205 | 1.25402  |
| H | 6.11821  | -1.58332 | -1.03194 |
| H | 3.98744  | -2.58196 | -1.79597 |
| C | 1.11994  | 2.02818  | 2.08709  |
| C | 1.52451  | 2.65885  | 0.79174  |
| H | 1.97922  | 1.83615  | 2.73093  |
| H | 0.40192  | 2.65242  | 2.63281  |
| C | 0.78663  | 3.71596  | 0.24189  |
| C | 1.10265  | 4.21833  | -1.01938 |
| C | 2.15302  | 3.66378  | -1.73404 |
| C | 2.91416  | 2.63024  | -1.17968 |
| C | 2.61228  | 2.13894  | 0.07842  |
| H | -0.01819 | 4.16340  | 0.82020  |
| H | 0.53538  | 5.04495  | -1.43269 |
| H | 2.40242  | 4.04938  | -2.71659 |
| H | 3.75592  | 2.22412  | -1.73046 |
| H | 3.21261  | 1.34451  | 0.51537  |
| C | -3.02742 | -0.33015 | -0.26454 |
| C | -4.51648 | -0.36746 | -0.14649 |
| H | -2.70356 | -0.81534 | -1.19536 |
| H | -2.69927 | 0.73387  | -0.33976 |
| C | -5.13875 | -0.22646 | 1.09270  |
| C | -5.29080 | -0.50262 | -1.29677 |
| C | -6.67698 | -0.48937 | -1.21199 |
| C | -7.29514 | -0.34886 | 0.02488  |
| C | -6.52426 | -0.22258 | 1.17601  |
| H | -4.53675 | -0.14354 | 1.99072  |
| H | -4.81062 | -0.62893 | -2.26319 |
| H | -7.27418 | -0.60053 | -2.11024 |
| H | -8.37744 | -0.34588 | 0.09331  |

|   |          |          |         |
|---|----------|----------|---------|
| H | -7.00544 | -0.12407 | 2.14294 |
|---|----------|----------|---------|

Glc-6B/conf\_1.out

Charge=+1, Multiplicity=+1

|   |          |          |          |
|---|----------|----------|----------|
| C | 1.51836  | -3.13260 | -0.30608 |
| O | 0.85099  | -3.08301 | 0.93988  |
| C | 1.78296  | -2.38770 | 1.74986  |
| C | 1.70993  | -0.89506 | 1.44063  |
| O | 0.46949  | -0.44636 | 1.94070  |
| C | 1.34907  | -1.77316 | -0.97213 |
| O | 3.15037  | -0.30543 | -0.38321 |
| O | -0.04950 | -1.66409 | -1.38024 |
| H | 1.07654  | -3.92428 | -0.91211 |
| C | 2.97314  | -3.39612 | 0.09250  |
| O | 3.04316  | -2.89369 | 1.42089  |
| H | 1.54844  | -2.58507 | 2.79611  |
| H | 3.69499  | -2.87610 | -0.54123 |
| H | 3.18792  | -4.46693 | 0.10241  |
| C | 0.40816  | 0.95957  | 2.22672  |
| C | -0.95105 | 1.46966  | 1.85755  |
| H | 1.17295  | 1.49136  | 1.65068  |
| H | 0.61504  | 1.10211  | 3.29263  |
| C | -2.01777 | 1.36714  | 2.74994  |
| C | -3.28471 | 1.80975  | 2.38483  |
| C | -3.49487 | 2.35559  | 1.12205  |
| C | -2.43529 | 2.46275  | 0.22756  |
| C | -1.16944 | 2.02321  | 0.59535  |
| H | -1.85174 | 0.95135  | 3.73932  |
| H | -4.10477 | 1.74253  | 3.09200  |
| H | -4.48021 | 2.71307  | 0.84228  |
| H | -2.59109 | 2.90467  | -0.75099 |
| H | -0.33755 | 2.14224  | -0.09399 |
| C | 3.31645  | 0.56206  | -1.50539 |
| C | 2.61599  | 1.88138  | -1.33140 |
| H | 4.39719  | 0.69406  | -1.58597 |
| H | 2.97277  | 0.07742  | -2.43010 |
| C | 1.66908  | 2.31435  | -2.25669 |
| C | 1.02945  | 3.54038  | -2.09480 |

|   |          |          |          |
|---|----------|----------|----------|
| C | 1.32276  | 4.33481  | -0.99398 |
| C | 2.26250  | 3.90567  | -0.05980 |
| C | 2.90883  | 2.68900  | -0.23012 |
| H | 1.44046  | 1.69574  | -3.12061 |
| H | 0.30500  | 3.87422  | -2.83009 |
| H | 0.82593  | 5.29005  | -0.86406 |
| H | 2.50070  | 4.52969  | 0.79495  |
| H | 3.65349  | 2.36087  | 0.48935  |
| C | -0.95298 | -1.35834 | -0.52827 |
| C | 1.81582  | -0.60701 | -0.07410 |
| H | 2.54967  | -0.39305 | 1.93196  |
| H | 1.88156  | -1.73343 | -1.92210 |
| H | 1.17541  | 0.26184  | -0.28394 |
| C | -2.31659 | -1.37725 | -0.89099 |
| C | -2.75939 | -1.77578 | -2.16966 |
| C | -4.10857 | -1.77215 | -2.44374 |
| C | -5.01917 | -1.37663 | -1.45622 |
| C | -4.58916 | -0.97831 | -0.19378 |
| C | -3.23758 | -0.97505 | 0.09519  |
| H | -2.87740 | -0.65536 | 1.06796  |
| H | -6.08059 | -1.38156 | -1.68199 |
| H | -5.30687 | -0.66919 | 0.55668  |
| H | -2.03807 | -2.08311 | -2.91810 |
| H | -4.46904 | -2.07805 | -3.41892 |
| H | -0.65238 | -1.06546 | 0.48350  |

Glc-6B/conf\_2.out

Charge=+1, Multiplicity=+1

|   |          |          |          |
|---|----------|----------|----------|
| C | 0.48016  | -3.11904 | 1.07848  |
| O | 0.04635  | -2.04931 | 1.89801  |
| C | 1.21957  | -1.26375 | 2.01104  |
| C | 1.40749  | -0.44735 | 0.72937  |
| O | 0.35965  | 0.48790  | 0.59744  |
| C | 0.48557  | -2.61299 | -0.35832 |
| O | 2.62343  | -1.82655 | -0.88620 |
| O | -0.91298 | -2.43527 | -0.75077 |
| H | -0.20625 | -3.95760 | 1.19894  |
| C | 1.89481  | -3.39707 | 1.59648  |

|   |          |          |          |
|---|----------|----------|----------|
| O | 2.27852  | -2.15921 | 2.18646  |
| H | 1.11839  | -0.62810 | 2.89233  |
| H | 2.59651  | -3.66569 | 0.80430  |
| H | 1.88270  | -4.17060 | 2.36727  |
| C | 0.51588  | 1.74684  | 1.25356  |
| C | -0.76858 | 2.48525  | 1.03680  |
| H | 1.37076  | 2.27191  | 0.81066  |
| H | 0.70488  | 1.60374  | 2.32355  |
| C | -1.74597 | 2.52163  | 2.02903  |
| C | -2.96982 | 3.13910  | 1.79046  |
| C | -3.22572 | 3.71765  | 0.55215  |
| C | -2.25475 | 3.68294  | -0.44516 |
| C | -1.03184 | 3.07073  | -0.20192 |
| H | -1.54725 | 2.06891  | 2.99608  |
| H | -3.71889 | 3.17522  | 2.57425  |
| H | -4.17435 | 4.21135  | 0.36867  |
| H | -2.44817 | 4.14439  | -1.40767 |
| H | -0.26986 | 3.04616  | -0.97542 |
| C | 3.28762  | -1.05735 | -1.89641 |
| C | 3.55725  | 0.36229  | -1.48664 |
| H | 4.21657  | -1.59960 | -2.07878 |
| H | 2.68800  | -1.07969 | -2.81597 |
| C | 4.54420  | 0.64458  | -0.53971 |
| C | 4.75306  | 1.94710  | -0.10874 |
| C | 3.98232  | 2.98562  | -0.62639 |
| C | 3.00831  | 2.71619  | -1.57974 |
| C | 2.79709  | 1.40803  | -2.00540 |
| H | 5.14466  | -0.16485 | -0.13486 |
| H | 5.52480  | 2.15722  | 0.62388  |
| H | 4.15373  | 4.00487  | -0.29708 |
| H | 2.42299  | 3.52630  | -2.00236 |
| H | 2.04285  | 1.20110  | -2.76009 |
| C | -1.56204 | -1.38784 | -0.41227 |
| C | 1.35303  | -1.34812 | -0.52780 |
| H | 2.38064  | 0.04920  | 0.74892  |
| H | 0.84478  | -3.36888 | -1.05521 |
| H | 0.92463  | -0.73620 | -1.33455 |
| C | -2.94006 | -1.25668 | -0.68828 |



|   |          |          |          |
|---|----------|----------|----------|
| C | -3.52962 | -0.02706 | -0.32975 |
| C | -4.87384 | 0.17926  | -0.57657 |
| C | -5.62447 | -0.83129 | -1.17184 |
| C | -5.04491 | -2.05466 | -1.52944 |
| C | -3.70629 | -2.27473 | -1.29225 |
| H | -3.23755 | -3.21460 | -1.56076 |
| H | -6.68034 | -0.66988 | -1.36330 |
| H | -5.65193 | -2.82483 | -1.99074 |
| H | -2.92681 | 0.74879  | 0.13381  |
| H | -5.33643 | 1.12115  | -0.30670 |
| H | -1.02945 | -0.56590 | 0.07679  |

Glc-6B/conf\_3.out

Charge=+1, Multiplicity=+1

|   |          |          |          |
|---|----------|----------|----------|
| C | -1.75936 | -2.79887 | -0.73358 |
| O | -1.69492 | -2.64552 | 0.67254  |
| C | -0.31389 | -2.83198 | 0.92922  |
| C | 0.44482  | -1.55072 | 0.57118  |
| O | 0.10100  | -0.53205 | 1.49102  |
| C | -1.29111 | -1.48639 | -1.34931 |
| O | 0.96823  | -1.60728 | -1.81657 |
| O | -2.33455 | -0.50189 | -1.07519 |
| H | -2.78751 | -3.02444 | -1.01807 |
| C | -0.77822 | -3.94397 | -1.00118 |
| O | 0.09720  | -3.89481 | 0.12096  |
| H | -0.19939 | -3.09481 | 1.98236  |
| H | -0.20937 | -3.81328 | -1.92361 |
| H | -1.29444 | -4.90628 | -1.00791 |
| C | 0.92643  | -0.47544 | 2.66393  |
| C | 2.25029  | 0.17955  | 2.40198  |
| H | 1.06592  | -1.48426 | 3.06932  |
| H | 0.34719  | 0.09859  | 3.38972  |
| C | 3.39574  | -0.58188 | 2.17077  |
| C | 4.61346  | 0.03544  | 1.90367  |
| C | 4.69782  | 1.42257  | 1.88242  |
| C | 3.56306  | 2.19075  | 2.12661  |
| C | 2.34656  | 1.57143  | 2.37809  |
| H | 3.34371  | -1.66628 | 2.22372  |

|   |          |          |          |
|---|----------|----------|----------|
| H | 5.49858  | -0.56636 | 1.72855  |
| H | 5.64906  | 1.90542  | 1.68680  |
| H | 3.63064  | 3.27348  | 2.12819  |
| H | 1.46279  | 2.17337  | 2.56893  |
| C | 2.25209  | -0.97605 | -1.89627 |
| C | 2.14715  | 0.48955  | -2.19844 |
| H | 2.81566  | -1.13133 | -0.96825 |
| H | 2.76189  | -1.51835 | -2.69446 |
| C | 1.57426  | 0.92272  | -3.39603 |
| C | 1.44522  | 2.27887  | -3.66033 |
| C | 1.89024  | 3.21619  | -2.73063 |
| C | 2.46290  | 2.79153  | -1.53883 |
| C | 2.58717  | 1.43170  | -1.27322 |
| H | 1.23704  | 0.19100  | -4.12463 |
| H | 1.01052  | 2.60922  | -4.59779 |
| H | 1.79729  | 4.27594  | -2.94299 |
| H | 2.81671  | 3.51635  | -0.81324 |
| H | 3.03538  | 1.10064  | -0.34199 |
| C | -2.41196 | 0.07967  | 0.05631  |
| C | 0.10141  | -1.06573 | -0.85380 |
| H | 1.51959  | -1.75103 | 0.59917  |
| H | -1.26605 | -1.52848 | -2.43698 |
| H | 0.16312  | 0.03293  | -0.85071 |
| C | -3.50911 | 0.92077  | 0.35404  |
| C | -4.56494 | 1.13763  | -0.55421 |
| C | -5.60231 | 1.96970  | -0.19379 |
| C | -5.59855 | 2.58398  | 1.06285  |
| C | -4.55992 | 2.37399  | 1.96740  |
| C | -3.51293 | 1.54316  | 1.61716  |
| H | -2.69341 | 1.36169  | 2.30523  |
| H | -6.42118 | 3.23593  | 1.33778  |
| H | -4.57568 | 2.85735  | 2.93696  |
| H | -4.54915 | 0.65160  | -1.52288 |
| H | -6.42194 | 2.14859  | -0.87981 |
| H | -1.61049 | -0.06383 | 0.78843  |

Glc-6B/conf\_4.out

Charge=+1, Multiplicity=+1

|   |          |          |          |
|---|----------|----------|----------|
| C | -0.74524 | -2.96050 | -0.52782 |
| O | -0.88437 | -2.69347 | 0.85568  |
| C | 0.43230  | -2.31260 | 1.22144  |
| C | 0.66400  | -0.86120 | 0.79649  |
| O | -0.20000 | -0.08917 | 1.61118  |
| C | -0.72239 | -1.62007 | -1.25377 |
| O | 1.47727  | -0.99079 | -1.52430 |
| O | -2.07446 | -1.06987 | -1.18632 |
| H | -1.58655 | -3.57184 | -0.85629 |
| C | 0.60249  | -3.67949 | -0.59774 |
| O | 1.29249  | -3.18445 | 0.54571  |
| H | 0.53635  | -2.42831 | 2.30070  |
| H | 1.16917  | -3.44868 | -1.50133 |
| H | 0.47088  | -4.75914 | -0.49741 |
| C | 0.31151  | 1.17174  | 2.05206  |
| C | 0.32309  | 2.21270  | 0.96904  |
| H | 1.31765  | 1.03154  | 2.46266  |
| H | -0.34953 | 1.46623  | 2.87092  |
| C | 1.52117  | 2.75142  | 0.51262  |
| C | 1.52579  | 3.68738  | -0.51832 |
| C | 0.33198  | 4.08423  | -1.10563 |
| C | -0.87388 | 3.55860  | -0.64649 |
| C | -0.87594 | 2.63610  | 0.38961  |
| H | 2.45851  | 2.43383  | 0.95887  |
| H | 2.46501  | 4.10929  | -0.86024 |
| H | 0.33575  | 4.81330  | -1.90855 |
| H | -1.81039 | 3.88545  | -1.08604 |
| H | -1.82092 | 2.25235  | 0.76503  |
| C | 2.42998  | 0.03903  | -1.75878 |
| C | 3.58823  | 0.05179  | -0.79458 |
| H | 2.80135  | -0.14830 | -2.77127 |
| H | 1.92914  | 1.01575  | -1.76528 |
| C | 3.94444  | -1.07917 | -0.06418 |
| C | 5.04235  | -1.04339 | 0.78954  |
| C | 5.80192  | 0.11410  | 0.90892  |
| C | 5.46194  | 1.23958  | 0.16562  |
| C | 4.35968  | 1.20740  | -0.67894 |
| H | 3.35542  | -1.98559 | -0.15411 |

|   |          |          |          |
|---|----------|----------|----------|
| H | 5.30857  | -1.92881 | 1.35720  |
| H | 6.65987  | 0.13821  | 1.57187  |
| H | 6.05580  | 2.14400  | 0.24509  |
| H | 4.09969  | 2.08816  | -1.25980 |
| C | -2.53098 | -0.55704 | -0.11182 |
| C | 0.37212  | -0.67336 | -0.71693 |
| H | 1.70806  | -0.59190 | 0.97769  |
| H | -0.56108 | -1.74157 | -2.32350 |
| H | 0.05542  | 0.36610  | -0.88048 |
| C | -3.88328 | -0.15019 | -0.03154 |
| C | -4.31281 | 0.39279  | 1.19504  |
| C | -5.62304 | 0.80736  | 1.33854  |
| C | -6.50097 | 0.68398  | 0.26354  |
| C | -6.08246 | 0.14558  | -0.95765 |
| C | -4.77924 | -0.27497 | -1.11215 |
| H | -4.43534 | -0.69572 | -2.05004 |
| H | -7.52982 | 1.00995  | 0.37558  |
| H | -6.78478 | 0.05878  | -1.77842 |
| H | -3.61230 | 0.47080  | 2.02081  |
| H | -5.96698 | 1.22235  | 2.27847  |
| H | -1.85296 | -0.41509 | 0.73569  |

Glc-6B/conf\_5.out

Charge=+1, Multiplicity=+1

|   |          |          |          |
|---|----------|----------|----------|
| C | 1.15913  | -3.62191 | -0.29838 |
| O | 2.00410  | -3.42695 | 0.82578  |
| C | 2.95029  | -2.51066 | 0.31704  |
| C | 2.36437  | -1.08233 | 0.35462  |
| O | 2.74507  | -0.38222 | 1.50726  |
| C | 0.40837  | -2.31353 | -0.57901 |
| O | 0.13015  | -0.08158 | -0.00917 |
| O | -1.02063 | -2.46198 | -0.36597 |
| H | 0.48075  | -4.45058 | -0.09723 |
| C | 2.20498  | -3.86822 | -1.37168 |
| O | 3.17326  | -2.88235 | -1.03487 |
| H | 3.86397  | -2.59130 | 0.90824  |
| H | 1.86154  | -3.69675 | -2.39384 |
| H | 2.62267  | -4.87542 | -1.28340 |

|   |          |          |          |
|---|----------|----------|----------|
| C | 3.89297  | 0.45767  | 1.32469  |
| C | 3.55175  | 1.68785  | 0.53363  |
| H | 4.70141  | -0.10641 | 0.84301  |
| H | 4.21410  | 0.71397  | 2.33533  |
| C | 3.82779  | 1.76934  | -0.83014 |
| C | 3.42218  | 2.87587  | -1.57007 |
| C | 2.73998  | 3.91428  | -0.94851 |
| C | 2.47845  | 3.85302  | 0.41750  |
| C | 2.88501  | 2.74763  | 1.15223  |
| H | 4.38032  | 0.96954  | -1.31637 |
| H | 3.65017  | 2.93103  | -2.62926 |
| H | 2.43003  | 4.78153  | -1.52184 |
| H | 1.96742  | 4.67335  | 0.91020  |
| H | 2.69303  | 2.70644  | 2.22110  |
| C | -0.17298 | 0.87549  | 1.01485  |
| C | -1.25482 | 1.76714  | 0.49231  |
| H | -0.49902 | 0.35155  | 1.92108  |
| H | 0.73739  | 1.43488  | 1.24570  |
| C | -1.10011 | 2.39550  | -0.74508 |
| C | -2.11185 | 3.20116  | -1.25128 |
| C | -3.27836 | 3.40276  | -0.51729 |
| C | -3.42846 | 2.79414  | 0.72291  |
| C | -2.42274 | 1.97254  | 1.22104  |
| H | -0.17893 | 2.25730  | -1.30280 |
| H | -1.98395 | 3.69035  | -2.21130 |
| H | -4.06035 | 4.04624  | -0.90648 |
| H | -4.32994 | 2.95708  | 1.30410  |
| H | -2.54776 | 1.48923  | 2.18585  |
| C | -1.74815 | -1.51153 | -0.83028 |
| C | 0.84551  | -1.21724 | 0.38295  |
| H | 2.66097  | -0.55148 | -0.55687 |
| H | 0.54555  | -1.97866 | -1.61234 |
| H | 0.56651  | -1.52022 | 1.40074  |
| C | -3.07658 | -1.32195 | -0.39487 |
| C | -3.81590 | -0.28988 | -1.00441 |
| C | -5.11941 | -0.06137 | -0.60964 |
| C | -5.68203 | -0.85196 | 0.38930  |
| C | -4.94946 | -1.87053 | 1.00886  |

|   |          |          |          |
|---|----------|----------|----------|
| C | -3.64813 | -2.10969 | 0.62575  |
| H | -3.06306 | -2.89404 | 1.09214  |
| H | -6.70645 | -0.67204 | 0.69871  |
| H | -5.40770 | -2.46895 | 1.78760  |
| H | -3.34949 | 0.33610  | -1.75868 |
| H | -5.69503 | 0.73407  | -1.06719 |
| H | -1.34054 | -0.88772 | -1.62266 |

Glc-4B/conf\_1.out

Charge=+1, Multiplicity=+1

|   |          |          |          |
|---|----------|----------|----------|
| C | -0.18169 | -3.12627 | 0.88475  |
| O | -1.54884 | -3.11116 | 1.28180  |
| C | -0.28950 | -2.98451 | -0.64730 |
| C | -0.78423 | -1.60268 | -1.08466 |
| C | -2.18524 | -1.57503 | -0.43971 |
| C | -2.27007 | -3.03179 | 0.05041  |
| H | 0.25819  | -4.10112 | 1.12233  |
| C | 0.50585  | -2.03671 | 1.68093  |
| O | -1.47167 | -3.74815 | -0.85853 |
| H | 0.54333  | -3.39493 | -1.21375 |
| H | -3.25482 | -3.47900 | 0.15951  |
| O | -3.15014 | -1.22524 | -1.38997 |
| H | -2.20076 | -0.88728 | 0.41417  |
| H | -0.91714 | -1.62573 | -2.17344 |
| O | 0.07542  | -0.55058 | -0.71540 |
| O | 1.86723  | -1.88429 | 1.18914  |
| H | 0.59498  | -2.32700 | 2.72868  |
| H | -0.01283 | -1.08411 | 1.58507  |
| C | 2.29641  | -0.71730 | 0.92463  |
| C | 3.59536  | -0.50590 | 0.41822  |
| H | 1.64298  | 0.13538  | 1.11470  |
| C | 3.99715  | 0.83140  | 0.23541  |
| C | 4.46911  | -1.57029 | 0.11291  |
| C | 5.72721  | -1.28705 | -0.36986 |
| C | 6.12134  | 0.04431  | -0.54787 |
| C | 5.26397  | 1.09992  | -0.24680 |
| H | 3.31012  | 1.63844  | 0.47000  |
| H | 7.11556  | 0.25616  | -0.92762 |

|   |          |          |          |
|---|----------|----------|----------|
| H | 5.58749  | 2.12408  | -0.39019 |
| H | 4.14444  | -2.59393 | 0.26060  |
| H | 6.41332  | -2.09040 | -0.61115 |
| C | -4.33469 | -0.66612 | -0.81946 |
| C | -4.06834 | 0.67483  | -0.19126 |
| H | -4.76917 | -1.35506 | -0.08342 |
| H | -5.03324 | -0.57999 | -1.65328 |
| C | -4.05693 | 0.83453  | 1.19293  |
| C | -3.74474 | 2.06603  | 1.76287  |
| C | -3.43640 | 3.14849  | 0.94888  |
| C | -3.45109 | 3.00100  | -0.43566 |
| C | -3.76770 | 1.77300  | -1.00022 |
| H | -4.30793 | -0.00840 | 1.83154  |
| H | -3.75311 | 2.18013  | 2.84187  |
| H | -3.19888 | 4.11100  | 1.38939  |
| H | -3.22681 | 3.84900  | -1.07401 |
| H | -3.78859 | 1.66029  | -2.08064 |
| C | -0.27447 | 0.67034  | -1.37642 |
| C | 0.43405  | 1.80970  | -0.71534 |
| H | -1.35804 | 0.81712  | -1.31049 |
| H | -0.00235 | 0.59762  | -2.43626 |
| C | 1.38654  | 2.56017  | -1.39875 |
| C | 2.02339  | 3.63016  | -0.77522 |
| C | 1.72690  | 3.94215  | 0.54641  |
| C | 0.77387  | 3.19610  | 1.23779  |
| C | 0.12184  | 2.14566  | 0.60500  |
| H | 1.62446  | 2.31349  | -2.42915 |
| H | 2.74893  | 4.22139  | -1.32409 |
| H | 2.22057  | 4.77641  | 1.03326  |
| H | 0.51961  | 3.45481  | 2.26030  |
| H | -0.66374 | 1.60223  | 1.12410  |

Glc-4B/conf\_2.out

Charge=+1, Multiplicity=+1

|   |         |          |         |
|---|---------|----------|---------|
| C | 1.99096 | 0.34429  | 2.02324 |
| O | 0.69333 | 0.25060  | 2.61012 |
| C | 2.12249 | -1.02026 | 1.33583 |
| C | 1.09808 | -1.28980 | 0.20706 |

|   |          |          |          |
|---|----------|----------|----------|
| C | -0.22342 | -1.27375 | 0.99511  |
| C | 0.32370  | -1.13498 | 2.42062  |
| H | 2.75039  | 0.37418  | 2.81558  |
| C | 2.12135  | 1.66348  | 1.28531  |
| O | 1.54507  | -1.81307 | 2.37853  |
| H | 3.14545  | -1.32847 | 1.13947  |
| H | -0.29559 | -1.47204 | 3.24808  |
| O | -0.90203 | -2.48150 | 0.79348  |
| H | -0.84422 | -0.41940 | 0.70702  |
| H | 1.26103  | -2.32498 | -0.11912 |
| O | 1.05218  | -0.42873 | -0.89367 |
| O | 0.94229  | 1.93403  | 0.50176  |
| H | 2.95325  | 1.65355  | 0.58231  |
| H | 2.24155  | 2.48234  | 2.00004  |
| C | -0.12313 | 2.24692  | 1.12959  |
| C | -1.36623 | 2.27401  | 0.46918  |
| H | -0.04552 | 2.53330  | 2.17842  |
| C | -2.48154 | 2.76980  | 1.17477  |
| C | -1.49913 | 1.80430  | -0.85572 |
| C | -2.73320 | 1.85690  | -1.46183 |
| C | -3.83264 | 2.35982  | -0.76049 |
| C | -3.71203 | 2.81431  | 0.55288  |
| H | -2.36388 | 3.11706  | 2.19659  |
| H | -4.80108 | 2.39135  | -1.24757 |
| H | -4.57874 | 3.19604  | 1.07923  |
| H | -0.63512 | 1.38150  | -1.35608 |
| H | -2.86135 | 1.48863  | -2.47145 |
| C | -2.28261 | -2.41647 | 1.09069  |
| C | -3.10488 | -1.77262 | 0.00151  |
| H | -2.45856 | -1.90810 | 2.04930  |
| H | -2.59884 | -3.45591 | 1.21751  |
| C | -2.71344 | -1.86676 | -1.33356 |
| C | -3.54455 | -1.39825 | -2.34432 |
| C | -4.77518 | -0.83004 | -2.03222 |
| C | -5.15989 | -0.71110 | -0.70081 |
| C | -4.32417 | -1.17311 | 0.30989  |
| H | -1.76469 | -2.33441 | -1.57424 |
| H | -3.24070 | -1.49932 | -3.38139 |



|   |          |          |          |
|---|----------|----------|----------|
| H | -5.43578 | -0.49044 | -2.82343 |
| H | -6.12071 | -0.27403 | -0.44833 |
| H | -4.63782 | -1.09262 | 1.34735  |
| C | 1.96130  | -0.74693 | -1.94707 |
| C | 3.37041  | -0.31368 | -1.65747 |
| H | 1.57320  | -0.22179 | -2.82278 |
| H | 1.92124  | -1.82455 | -2.14967 |
| C | 3.72169  | 1.03311  | -1.76827 |
| C | 5.00552  | 1.45805  | -1.44913 |
| C | 5.95581  | 0.53639  | -1.01796 |
| C | 5.62209  | -0.80966 | -0.92496 |
| C | 4.33613  | -1.23082 | -1.24765 |
| H | 2.98524  | 1.74964  | -2.12305 |
| H | 5.27286  | 2.50454  | -1.55325 |
| H | 6.96068  | 0.86501  | -0.77602 |
| H | 6.36637  | -1.53398 | -0.61195 |
| H | 4.08368  | -2.28646 | -1.18953 |

Glc-4B/conf\_3.out

Charge=+1, Multiplicity=+1

|   |          |         |          |
|---|----------|---------|----------|
| C | 0.15901  | 3.74816 | 0.25200  |
| O | -0.84574 | 3.12748 | 1.05093  |
| C | 1.42978  | 3.03209 | 0.73773  |
| C | 1.46154  | 1.52696 | 0.40446  |
| C | 0.27643  | 1.01568 | 1.26715  |
| C | -0.10049 | 2.31186 | 1.98112  |
| H | 0.25389  | 4.80373 | 0.53814  |
| C | -0.29199 | 3.75220 | -1.20242 |
| O | 1.11440  | 2.98978 | 2.12835  |
| H | 2.35270  | 3.58410 | 0.56943  |
| H | -0.63660 | 2.22551 | 2.92199  |
| O | 0.64400  | 0.08102 | 2.23925  |
| H | -0.54031 | 0.63877 | 0.64307  |
| H | 2.37519  | 1.11035 | 0.84046  |
| O | 1.36337  | 1.22654 | -0.96190 |
| O | -0.89308 | 2.49785 | -1.56624 |
| H | 0.53876  | 3.89324 | -1.89086 |
| H | -1.03684 | 4.53772 | -1.35774 |

|   |          |          |          |
|---|----------|----------|----------|
| C | -2.04293 | 2.22015  | -1.08597 |
| C | -2.56065 | 0.91659  | -1.19454 |
| H | -2.62878 | 3.01907  | -0.63144 |
| C | -3.89785 | 0.69413  | -0.80699 |
| C | -1.75830 | -0.14601 | -1.66721 |
| C | -2.30533 | -1.40416 | -1.76452 |
| C | -3.63774 | -1.61345 | -1.39601 |
| C | -4.43350 | -0.57156 | -0.91872 |
| H | -4.49672 | 1.51877  | -0.43314 |
| H | -4.05896 | -2.60913 | -1.47851 |
| H | -5.46158 | -0.75893 | -0.63264 |
| H | -0.71974 | 0.04643  | -1.91454 |
| H | -1.70361 | -2.23746 | -2.10453 |
| C | 0.88491  | -1.21827 | 1.73506  |
| C | -0.36969 | -1.99174 | 1.41388  |
| H | 1.43107  | -1.73527 | 2.52924  |
| H | 1.54556  | -1.18600 | 0.85980  |
| C | -1.59519 | -1.66119 | 1.98839  |
| C | -2.71193 | -2.46086 | 1.77298  |
| C | -2.61341 | -3.60558 | 0.98938  |
| C | -1.39469 | -3.93506 | 0.40344  |
| C | -0.28406 | -3.12586 | 0.60551  |
| H | -1.66003 | -0.79244 | 2.63520  |
| H | -3.65679 | -2.20314 | 2.24059  |
| H | -3.47671 | -4.24848 | 0.85087  |
| H | -1.30757 | -4.83147 | -0.20246 |
| H | 0.66928  | -3.38687 | 0.15517  |
| C | 2.61368  | 0.91816  | -1.58897 |
| C | 3.10028  | -0.45536 | -1.23081 |
| H | 3.36386  | 1.67536  | -1.32891 |
| H | 2.41642  | 0.99281  | -2.66066 |
| C | 4.11441  | -0.63913 | -0.29254 |
| C | 4.50898  | -1.91950 | 0.08176  |
| C | 3.89867  | -3.02823 | -0.49108 |
| C | 2.89844  | -2.85468 | -1.44416 |
| C | 2.50010  | -1.57594 | -1.80760 |
| H | 4.60846  | 0.22473  | 0.14377  |
| H | 5.29851  | -2.05010 | 0.81370  |

|   |         |          |          |
|---|---------|----------|----------|
| H | 4.21220 | -4.02732 | -0.20817 |
| H | 2.44076 | -3.71961 | -1.91335 |
| H | 1.72323 | -1.44210 | -2.55545 |

Glc-4B/conf\_4.out

Charge=+1, Multiplicity=+1

|   |          |          |          |
|---|----------|----------|----------|
| C | -0.38136 | -2.55197 | 1.23332  |
| O | 0.83123  | -2.22743 | 1.91068  |
| C | -1.21825 | -1.29018 | 1.47207  |
| C | -0.63394 | -0.00236 | 0.84695  |
| C | 0.68122  | 0.14993  | 1.65620  |
| C | 0.51431  | -1.01098 | 2.63249  |
| H | -0.88743 | -3.37392 | 1.75714  |
| C | -0.06254 | -3.09587 | -0.14771 |
| O | -0.86365 | -1.08936 | 2.84433  |
| H | -2.29137 | -1.42727 | 1.36452  |
| H | 1.07262  | -0.96748 | 3.56340  |
| O | 0.80258  | 1.33528  | 2.38546  |
| H | 1.55414  | 0.00842  | 1.00810  |
| H | -1.29704 | 0.81791  | 1.13829  |
| O | -0.41742 | -0.00047 | -0.53605 |
| O | 0.94393  | -2.29810 | -0.80540 |
| H | -0.93499 | -3.07129 | -0.79803 |
| H | 0.32345  | -4.11586 | -0.06990 |
| C | 2.13234  | -2.34891 | -0.35535 |
| C | 3.09821  | -1.40855 | -0.78064 |
| H | 2.40130  | -3.15108 | 0.33184  |
| C | 4.43241  | -1.59526 | -0.37162 |
| C | 2.73228  | -0.29752 | -1.56930 |
| C | 3.70683  | 0.59833  | -1.95310 |
| C | 5.03317  | 0.39984  | -1.55669 |
| C | 5.39773  | -0.68941 | -0.76659 |
| H | 4.69501  | -2.44829 | 0.24629  |
| H | 5.79281  | 1.11078  | -1.86500 |
| H | 6.42967  | -0.82232 | -0.46433 |
| H | 1.68851  | -0.15186 | -1.82460 |
| H | 3.44804  | 1.45854  | -2.55979 |
| C | 1.31559  | 2.43530  | 1.65272  |

|   |          |          |          |
|---|----------|----------|----------|
| C | 0.32434  | 3.07822  | 0.71754  |
| H | 2.20979  | 2.12559  | 1.09233  |
| H | 1.63129  | 3.15427  | 2.41323  |
| C | -0.92339 | 3.48846  | 1.19050  |
| C | -1.82469 | 4.11881  | 0.34259  |
| C | -1.48580 | 4.35623  | -0.98750 |
| C | -0.24511 | 3.95300  | -1.46488 |
| C | 0.65089  | 3.31163  | -0.61464 |
| H | -1.18169 | 3.31411  | 2.23086  |
| H | -2.78857 | 4.44147  | 0.72220  |
| H | -2.18578 | 4.85921  | -1.64587 |
| H | 0.02556  | 4.13967  | -2.49890 |
| H | 1.62188  | 2.99708  | -0.98788 |
| C | -1.50329 | 0.53868  | -1.29630 |
| C | -2.72873 | -0.32520 | -1.23273 |
| H | -1.12432 | 0.60546  | -2.31850 |
| H | -1.71965 | 1.55286  | -0.94464 |
| C | -2.78769 | -1.51869 | -1.95451 |
| C | -3.88033 | -2.36766 | -1.83075 |
| C | -4.93169 | -2.02730 | -0.98374 |
| C | -4.89367 | -0.82952 | -0.27964 |
| C | -3.79774 | 0.01775  | -0.40750 |
| H | -1.97874 | -1.76926 | -2.63680 |
| H | -3.92469 | -3.28592 | -2.40727 |
| H | -5.78792 | -2.68627 | -0.88927 |
| H | -5.72065 | -0.55188 | 0.36503  |
| H | -3.77124 | 0.95707  | 0.13821  |

Glc-4B/conf\_5.out

Charge=+1, Multiplicity=+1

|   |         |          |          |
|---|---------|----------|----------|
| C | 1.11088 | -3.40969 | 0.70958  |
| O | 0.12465 | -3.54323 | -0.30639 |
| C | 2.09167 | -2.41093 | 0.07465  |
| C | 1.52212 | -1.01125 | -0.16993 |
| C | 0.36096 | -1.31235 | -1.13891 |
| C | 0.65256 | -2.80194 | -1.40561 |
| H | 1.64966 | -4.36005 | 0.83176  |
| C | 0.44999 | -3.14462 | 2.04237  |

|   |          |          |          |
|---|----------|----------|----------|
| O | 2.04750  | -2.90659 | -1.26234 |
| H | 3.10503  | -2.44027 | 0.46964  |
| H | 0.31886  | -3.23030 | -2.34736 |
| O | 0.49276  | -0.49457 | -2.26978 |
| H | -0.62121 | -1.18741 | -0.66731 |
| H | 2.28438  | -0.47787 | -0.74658 |
| O | 1.22548  | -0.26812 | 0.99197  |
| O | -0.58082 | -2.13845 | 1.93070  |
| H | 1.17651  | -2.84656 | 2.80383  |
| H | -0.08217 | -4.03810 | 2.36938  |
| C | -0.42533 | -1.00495 | 2.48769  |
| C | -1.44472 | -0.02171 | 2.41133  |
| H | 0.42829  | -0.85843 | 3.14799  |
| C | -1.32825 | 1.10965  | 3.23850  |
| C | -2.55293 | -0.17536 | 1.55859  |
| C | -3.53126 | 0.79614  | 1.54772  |
| C | -3.41104 | 1.91724  | 2.37154  |
| C | -2.31467 | 2.07727  | 3.21634  |
| H | -0.47274 | 1.21173  | 3.89945  |
| H | -4.18615 | 2.67633  | 2.35471  |
| H | -2.23894 | 2.95012  | 3.85396  |
| H | -2.63063 | -1.04923 | 0.92195  |
| H | -4.38699 | 0.69163  | 0.89367  |
| C | -0.64738 | -0.50177 | -3.11663 |
| C | -1.81305 | 0.26857  | -2.55307 |
| H | -0.95533 | -1.52888 | -3.35070 |
| H | -0.30934 | -0.04310 | -4.04914 |
| C | -3.08134 | -0.30234 | -2.48403 |
| C | -4.17477 | 0.44911  | -2.06188 |
| C | -4.00191 | 1.77567  | -1.68746 |
| C | -2.73202 | 2.34584  | -1.72353 |
| C | -1.64703 | 1.59747  | -2.15783 |
| H | -3.22278 | -1.33434 | -2.79333 |
| H | -5.16282 | 0.00059  | -2.04303 |
| H | -4.85637 | 2.37120  | -1.38200 |
| H | -2.59417 | 3.38439  | -1.44108 |
| H | -0.66417 | 2.05454  | -2.22340 |
| C | 1.11198  | 1.14837  | 0.72372  |

|   |         |         |          |
|---|---------|---------|----------|
| C | 2.40554 | 1.75801 | 0.27945  |
| H | 0.78821 | 1.58567 | 1.66920  |
| H | 0.32185 | 1.30595 | -0.01766 |
| C | 2.61409 | 2.08269 | -1.06001 |
| C | 3.82330 | 2.63284 | -1.46957 |
| C | 4.83264 | 2.85786 | -0.54183 |
| C | 4.63291 | 2.53453 | 0.79715  |
| C | 3.42431 | 1.98809 | 1.20470  |
| H | 1.83111 | 1.88568 | -1.78608 |
| H | 3.97803 | 2.88255 | -2.51351 |
| H | 5.77588 | 3.28844 | -0.85997 |
| H | 5.41837 | 2.71640 | 1.52263  |
| H | 3.26741 | 1.74220 | 2.25145  |

Glc-4B/conf\_6.out

Charge=+1, Multiplicity=+1

|   |          |          |          |
|---|----------|----------|----------|
| C | -0.60832 | 2.03795  | 1.66735  |
| O | -1.53442 | 1.12376  | 2.25147  |
| C | 0.61372  | 1.14436  | 1.43950  |
| C | 0.39621  | -0.01556 | 0.44169  |
| C | -0.68541 | -0.84574 | 1.17405  |
| C | -0.74730 | -0.06706 | 2.49419  |
| H | -0.32330 | 2.79655  | 2.40817  |
| C | -1.28206 | 2.80384  | 0.54177  |
| O | 0.55397  | 0.42060  | 2.67596  |
| H | 1.55819  | 1.67549  | 1.34721  |
| H | -1.11937 | -0.58432 | 3.37524  |
| O | -0.47002 | -2.22375 | 1.30223  |
| H | -1.63770 | -0.76710 | 0.64969  |
| H | 1.33280  | -0.57827 | 0.44127  |
| O | 0.02644  | 0.30343  | -0.87084 |
| O | -2.06844 | 1.92647  | -0.28870 |
| H | -0.55063 | 3.26493  | -0.11934 |
| H | -1.95321 | 3.56392  | 0.95065  |
| C | -3.14775 | 1.45581  | 0.19563  |
| C | -3.83006 | 0.40963  | -0.46129 |
| H | -3.55247 | 1.89990  | 1.10529  |
| C | -5.09240 | 0.02633  | 0.03263  |

|   |          |          |          |
|---|----------|----------|----------|
| C | -3.25205 | -0.25478 | -1.56431 |
| C | -3.94916 | -1.27946 | -2.16616 |
| C | -5.20888 | -1.64491 | -1.68107 |
| C | -5.78063 | -0.99868 | -0.58567 |
| H | -5.51660 | 0.53879  | 0.89044  |
| H | -5.74930 | -2.45369 | -2.16202 |
| H | -6.75478 | -1.30226 | -0.22138 |
| H | -2.25770 | 0.02985  | -1.89129 |
| H | -3.52106 | -1.80827 | -3.00965 |
| C | 0.79266  | -2.66776 | 1.78654  |
| C | 1.82903  | -2.81165 | 0.69920  |
| H | 0.58784  | -3.64408 | 2.23497  |
| H | 1.16874  | -2.01227 | 2.57947  |
| C | 1.46226  | -3.23968 | -0.57592 |
| C | 2.41902  | -3.36783 | -1.57537 |
| C | 3.75375  | -3.07565 | -1.31001 |
| C | 4.12695  | -2.65910 | -0.03732 |
| C | 3.16736  | -2.52426 | 0.96086  |
| H | 0.41941  | -3.45871 | -0.78047 |
| H | 2.12512  | -3.70440 | -2.56431 |
| H | 4.50002  | -3.17883 | -2.09029 |
| H | 5.16675  | -2.43703 | 0.17937  |
| H | 3.46114  | -2.18646 | 1.95114  |
| C | 1.13545  | 0.38395  | -1.77557 |
| C | 2.08648  | 1.48429  | -1.40748 |
| H | 0.68531  | 0.56244  | -2.75461 |
| H | 1.65166  | -0.58306 | -1.79764 |
| C | 3.28684  | 1.19546  | -0.76128 |
| C | 4.11832  | 2.22274  | -0.32649 |
| C | 3.75722  | 3.54798  | -0.53953 |
| C | 2.57127  | 3.84562  | -1.20590 |
| C | 1.74348  | 2.81760  | -1.63866 |
| H | 3.56949  | 0.15892  | -0.59661 |
| H | 5.05116  | 1.98826  | 0.17509  |
| H | 4.40711  | 4.34913  | -0.20458 |
| H | 2.30485  | 4.87904  | -1.40222 |
| H | 0.83016  | 3.04689  | -2.18261 |

Glc-4B/conf\_7.out

Charge=+1, Multiplicity=+1

|   |          |          |          |
|---|----------|----------|----------|
| C | 1.22431  | -2.69195 | -1.76378 |
| O | 1.56454  | -3.34862 | -0.55018 |
| C | -0.14338 | -2.08224 | -1.42129 |
| C | -0.12430 | -1.01364 | -0.32375 |
| C | 0.40396  | -1.82800 | 0.89150  |
| C | 0.39595  | -3.23031 | 0.25875  |
| H | 1.05395  | -3.43694 | -2.55455 |
| C | 2.38675  | -1.85605 | -2.24942 |
| O | -0.66614 | -3.17911 | -0.66920 |
| H | -0.78043 | -1.86681 | -2.27739 |
| H | 0.31351  | -4.08668 | 0.92389  |
| O | -0.28945 | -1.68004 | 2.09763  |
| H | 1.43218  | -1.53924 | 1.11964  |
| H | -1.16799 | -0.74363 | -0.14850 |
| O | 0.59213  | 0.16714  | -0.64038 |
| O | 2.97665  | -1.08421 | -1.17989 |
| H | 2.09442  | -1.19070 | -3.06697 |
| H | 3.19156  | -2.51324 | -2.57925 |
| C | 2.86712  | 0.18300  | -1.17727 |
| C | 3.45540  | 0.95642  | -0.14386 |
| H | 2.43900  | 0.67437  | -2.05008 |
| C | 3.47952  | 2.35347  | -0.30237 |
| C | 3.99724  | 0.35573  | 1.00732  |
| C | 4.55326  | 1.15437  | 1.98459  |
| C | 4.57704  | 2.54232  | 1.82084  |
| C | 4.04611  | 3.14292  | 0.68162  |
| H | 3.06212  | 2.80476  | -1.19759 |
| H | 5.01888  | 3.16200  | 2.59411  |
| H | 4.07737  | 4.21999  | 0.56734  |
| H | 3.97310  | -0.72298 | 1.11349  |
| H | 4.97302  | 0.70786  | 2.87840  |
| C | -1.62942 | -2.17799 | 2.18522  |
| C | -2.66052 | -1.25121 | 1.59963  |
| H | -1.79340 | -2.29627 | 3.25863  |
| H | -1.71192 | -3.16773 | 1.72541  |
| C | -3.46544 | -1.65602 | 0.53632  |



|   |          |          |          |
|---|----------|----------|----------|
| C | -4.39251 | -0.78024 | -0.01915 |
| C | -4.52165 | 0.50772  | 0.48522  |
| C | -3.73340 | 0.91274  | 1.55756  |
| C | -2.81015 | 0.03762  | 2.11289  |
| H | -3.35311 | -2.65837 | 0.13384  |
| H | -5.01425 | -1.10508 | -0.84681 |
| H | -5.23826 | 1.19479  | 0.04911  |
| H | -3.84421 | 1.91243  | 1.96256  |
| H | -2.19788 | 0.35140  | 2.95374  |
| C | 0.12816  | 1.28954  | 0.10898  |
| C | -1.03853 | 1.99412  | -0.52990 |
| H | 0.97643  | 1.97432  | 0.19695  |
| H | -0.12859 | 0.96301  | 1.12371  |
| C | -1.59738 | 1.57355  | -1.73046 |
| C | -2.68258 | 2.25221  | -2.27668 |
| C | -3.20870 | 3.36240  | -1.63168 |
| C | -2.64527 | 3.79416  | -0.43447 |
| C | -1.57015 | 3.11126  | 0.11405  |
| H | -1.18524 | 0.71369  | -2.24639 |
| H | -3.11598 | 1.91061  | -3.21063 |
| H | -4.05236 | 3.89302  | -2.05926 |
| H | -3.04873 | 4.66329  | 0.07413  |
| H | -1.14369 | 3.44561  | 1.05638  |

Gal-oxo/conf\_1.out

Charge=+1, Multiplicity=+1

|   |          |          |          |
|---|----------|----------|----------|
| C | -0.41615 | -0.69616 | -0.36022 |
| C | 0.63239  | -0.41926 | 0.71122  |
| C | 0.41893  | 0.95223  | 1.32826  |
| O | 1.90059  | -0.47769 | 0.11433  |
| H | 0.54353  | -1.15450 | 1.52637  |
| O | 0.34614  | 1.98566  | 0.27136  |
| H | -0.52826 | 1.03180  | 1.86569  |
| C | 1.60397  | 1.33864  | 2.18802  |
| C | 0.01210  | 1.69968  | -0.90709 |
| C | -0.21635 | 0.33376  | -1.46298 |
| H | 0.74542  | 0.09926  | -1.95384 |
| O | -1.16126 | 0.38375  | -2.48209 |

|   |          |          |          |
|---|----------|----------|----------|
| O | 2.80022  | 1.15948  | 1.47821  |
| H | 1.57643  | 0.71628  | 3.09559  |
| H | 1.55031  | 2.38760  | 2.48222  |
| C | 2.94198  | -0.15908 | 1.02189  |
| C | 4.25917  | -0.32909 | 0.32947  |
| C | 5.32934  | 0.50443  | 0.64105  |
| C | 6.55875  | 0.30921  | 0.02382  |
| C | 6.72273  | -0.71589 | -0.89994 |
| C | 5.65306  | -1.54889 | -1.20821 |
| C | 4.42213  | -1.35932 | -0.59418 |
| H | 5.19725  | 1.30557  | 1.35833  |
| H | 7.39072  | 0.96143  | 0.26582  |
| H | 7.68386  | -0.86648 | -1.37934 |
| H | 5.77717  | -2.34947 | -1.92925 |
| H | 3.58528  | -2.00441 | -0.83728 |
| H | 0.05634  | 2.54009  | -1.59572 |
| H | -1.39809 | -0.55168 | 0.10722  |
| O | -0.32613 | -1.95597 | -0.93838 |
| C | -0.85566 | -3.01696 | -0.13706 |
| C | -2.28941 | -2.78218 | 0.24733  |
| H | -0.23776 | -3.16519 | 0.75780  |
| H | -0.75039 | -3.90349 | -0.76357 |
| C | -2.63727 | -2.45962 | 1.55830  |
| C | -3.95842 | -2.17862 | 1.89423  |
| C | -4.94457 | -2.21785 | 0.91556  |
| C | -4.60895 | -2.54986 | -0.39438 |
| C | -3.28951 | -2.82976 | -0.72597 |
| H | -1.87040 | -2.44700 | 2.32914  |
| H | -4.21910 | -1.94252 | 2.92056  |
| H | -5.97655 | -2.00770 | 1.17494  |
| H | -5.38059 | -2.60217 | -1.15508 |
| H | -3.02818 | -3.09363 | -1.74679 |
| C | -2.51032 | 0.53787  | -2.02237 |
| C | -2.64324 | 1.67380  | -1.04915 |
| H | -2.86422 | -0.39615 | -1.57581 |
| H | -3.08407 | 0.72184  | -2.93219 |
| C | -3.03629 | 1.44457  | 0.27557  |
| C | -3.12230 | 2.49858  | 1.17374  |

|   |          |          |          |
|---|----------|----------|----------|
| C | -2.82809 | 3.79702  | 0.76018  |
| C | -2.47717 | 4.04558  | -0.56151 |
| C | -2.39180 | 2.99166  | -1.46294 |
| H | -3.29934 | 0.43735  | 0.59123  |
| H | -3.43673 | 2.31462  | 2.19584  |
| H | -2.90072 | 4.61866  | 1.46449  |
| H | -2.28605 | 5.06018  | -0.89315 |
| H | -2.14460 | 3.18184  | -2.50404 |
| H | 2.84804  | -0.84087 | 1.88764  |

Gal-oxo/conf\_2.out

Charge=+1, Multiplicity=+1

|   |          |          |          |
|---|----------|----------|----------|
| C | 0.89728  | 0.93234  | -0.77015 |
| C | 0.01140  | 0.40088  | 0.35645  |
| C | 0.80376  | -0.42630 | 1.35095  |
| O | -0.98460 | -0.40347 | -0.21972 |
| H | -0.43177 | 1.23717  | 0.91303  |
| O | 1.54495  | -1.50194 | 0.65295  |
| H | 1.57076  | 0.14871  | 1.87421  |
| C | -0.13586 | -1.12664 | 2.31194  |
| C | 1.87962  | -1.37785 | -0.55174 |
| C | 1.48367  | -0.28145 | -1.48381 |
| H | 0.64602  | -0.73320 | -2.04567 |
| O | 2.48793  | -0.06041 | -2.42172 |
| O | -1.15114 | -1.79694 | 1.61395  |
| H | -0.54839 | -0.35904 | 2.98447  |
| H | 0.39561  | -1.86793 | 2.91026  |
| C | -1.85590 | -0.92823 | 0.76296  |
| C | -2.97870 | -1.65976 | 0.09566  |
| C | -3.63485 | -2.68720 | 0.76819  |
| C | -4.71351 | -3.32634 | 0.17040  |
| C | -5.14086 | -2.94182 | -1.09528 |
| C | -4.48488 | -1.91604 | -1.76570 |
| C | -3.40593 | -1.27310 | -1.17216 |
| H | -3.29473 | -2.98997 | 1.75163  |
| H | -5.22048 | -4.12897 | 0.69475  |
| H | -5.98347 | -3.44262 | -1.55950 |

|   |          |          |          |
|---|----------|----------|----------|
| H | -4.81234 | -1.61678 | -2.75551 |
| H | -2.88616 | -0.47880 | -1.69466 |
| H | 2.37423  | -2.25313 | -0.96661 |
| H | 1.69397  | 1.53242  | -0.30483 |
| O | 0.23212  | 1.66485  | -1.74586 |
| C | -0.08036 | 3.01548  | -1.40928 |
| C | -1.17833 | 3.13216  | -0.38779 |
| H | -0.37629 | 3.46593  | -2.35891 |
| H | 0.82527  | 3.52969  | -1.05834 |
| C | -0.97347 | 3.81008  | 0.81182  |
| C | -1.97238 | 3.84786  | 1.78049  |
| C | -3.18121 | 3.19994  | 1.55524  |
| C | -3.39867 | 2.53437  | 0.35087  |
| C | -2.40523 | 2.50831  | -0.61779 |
| H | -0.02623 | 4.31196  | 0.99193  |
| H | -1.80666 | 4.38365  | 2.70905  |
| H | -3.96009 | 3.22527  | 2.30975  |
| H | -4.34676 | 2.04039  | 0.16541  |
| H | -2.57012 | 1.98579  | -1.55425 |
| C | 3.63528  | 0.61772  | -1.90140 |
| C | 4.15883  | -0.05016 | -0.66190 |
| H | 3.40037  | 1.67016  | -1.70902 |
| H | 4.36248  | 0.57943  | -2.71380 |
| C | 4.14832  | 0.60052  | 0.57726  |
| C | 4.60558  | -0.04489 | 1.71744  |
| C | 5.09065  | -1.34818 | 1.63363  |
| C | 5.14415  | -1.99501 | 0.40383  |
| C | 4.68752  | -1.34901 | -0.73732 |
| H | 3.80192  | 1.62862  | 0.63941  |
| H | 4.60234  | 0.47114  | 2.67178  |
| H | 5.45160  | -1.84940 | 2.52510  |
| H | 5.55509  | -2.99594 | 0.33238  |
| H | 4.74580  | -1.84131 | -1.70439 |
| H | -2.23148 | -0.07610 | 1.35860  |

Gal-oxo/conf\_3.out

Charge=+1, Multiplicity=+1

|   |         |         |          |
|---|---------|---------|----------|
| C | 1.00426 | 1.19376 | -0.33873 |
|---|---------|---------|----------|

|   |          |          |          |
|---|----------|----------|----------|
| C | 0.15322  | 0.47808  | 0.70430  |
| C | 1.02110  | -0.43698 | 1.55113  |
| O | -0.81006 | -0.30949 | 0.04587  |
| H | -0.32369 | 1.21652  | 1.36511  |
| O | 1.79599  | -1.35210 | 0.67663  |
| H | 1.77479  | 0.09767  | 2.13296  |
| C | 0.15849  | -1.32786 | 2.41991  |
| C | 2.04103  | -1.07013 | -0.52461 |
| C | 1.51856  | 0.10201  | -1.28695 |
| H | 0.64862  | -0.32549 | -1.81560 |
| O | 2.41506  | 0.48278  | -2.27786 |
| O | -0.83838 | -1.95630 | 1.65757  |
| H | -0.27723 | -0.69445 | 3.20795  |
| H | 0.75239  | -2.11136 | 2.89262  |
| C | -1.63127 | -1.02937 | 0.95613  |
| C | -2.69019 | -1.74873 | 0.19082  |
| C | -4.02441 | -1.59557 | 0.54884  |
| C | -5.01654 | -2.26068 | -0.16168 |
| C | -4.67338 | -3.07731 | -1.23200 |
| C | -3.33717 | -3.23591 | -1.58796 |
| C | -2.34636 | -2.57530 | -0.87612 |
| H | -4.28881 | -0.95161 | 1.38172  |
| H | -6.05684 | -2.14186 | 0.12070  |
| H | -5.44686 | -3.59547 | -1.78835 |
| H | -3.07032 | -3.88004 | -2.41872 |
| H | -1.30320 | -2.70500 | -1.14396 |
| H | 2.57006  | -1.85360 | -1.06235 |
| H | 1.85735  | 1.61455  | 0.20105  |
| O | 0.44925  | 2.27682  | -1.00334 |
| C | -0.85103 | 2.14280  | -1.58129 |
| C | -1.95951 | 2.39461  | -0.59400 |
| H | -0.97940 | 1.16109  | -2.04944 |
| H | -0.86787 | 2.89519  | -2.37388 |
| C | -3.16297 | 1.70285  | -0.70142 |
| C | -4.20446 | 1.96210  | 0.18154  |
| C | -4.04545 | 2.90365  | 1.19197  |
| C | -2.84347 | 3.59451  | 1.30731  |
| C | -1.80815 | 3.34702  | 0.41342  |

|   |          |          |          |
|---|----------|----------|----------|
| H | -3.28560 | 0.94666  | -1.47128 |
| H | -5.13974 | 1.42166  | 0.08154  |
| H | -4.85748 | 3.10520  | 1.88230  |
| H | -2.71803 | 4.33973  | 2.08582  |
| H | -0.87616 | 3.89822  | 0.49065  |
| C | 3.56228  | 1.18503  | -1.78225 |
| C | 4.24604  | 0.41535  | -0.68737 |
| H | 3.27154  | 2.18460  | -1.44341 |
| H | 4.20738  | 1.29643  | -2.65491 |
| C | 4.33929  | 0.92335  | 0.61372  |
| C | 4.94454  | 0.18288  | 1.61937  |
| C | 5.47861  | -1.07226 | 1.33610  |
| C | 5.43087  | -1.57420 | 0.04013  |
| C | 4.82423  | -0.83380 | -0.96589 |
| H | 3.95950  | 1.91866  | 0.82890  |
| H | 5.01976  | 0.58973  | 2.62222  |
| H | 5.95616  | -1.64698 | 2.12215  |
| H | 5.87956  | -2.53450 | -0.18880 |
| H | 4.80245  | -1.21130 | -1.98477 |
| H | -2.07202 | -0.30726 | 1.66225  |

Gal-oxo/conf\_4.out

Charge=+1, Multiplicity=+1

|   |          |          |          |
|---|----------|----------|----------|
| C | -0.93878 | 0.47582  | -1.46100 |
| C | -0.32011 | -0.91658 | -1.47185 |
| C | -1.17964 | -1.94496 | -0.76340 |
| O | 0.91390  | -0.82770 | -0.80846 |
| H | -0.19163 | -1.23674 | -2.51678 |
| O | -1.50705 | -1.47384 | 0.59991  |
| H | -2.14474 | -2.11214 | -1.24618 |
| C | -0.40725 | -3.23423 | -0.57022 |
| C | -1.53177 | -0.24567 | 0.87317  |
| C | -1.10048 | 0.87911  | 0.00644  |
| H | -0.08832 | 1.11082  | 0.39841  |
| O | -1.87096 | 2.01034  | 0.28885  |
| O | 0.84305  | -2.98385 | 0.01592  |
| H | -0.30014 | -3.71017 | -1.55693 |
| H | -0.94539 | -3.91741 | 0.08818  |

|   |          |          |          |
|---|----------|----------|----------|
| C | 1.59928  | -2.06913 | -0.73146 |
| C | 2.91736  | -1.81475 | -0.07589 |
| C | 3.01772  | -1.75059 | 1.31079  |
| C | 4.23642  | -1.44493 | 1.90112  |
| C | 5.35372  | -1.19799 | 1.10955  |
| C | 5.25310  | -1.26110 | -0.27569 |
| C | 4.03458  | -1.57078 | -0.86769 |
| H | 2.14636  | -1.95590 | 1.92220  |
| H | 4.31777  | -1.40361 | 2.98186  |
| H | 6.30608  | -0.96434 | 1.57330  |
| H | 6.12442  | -1.07745 | -0.89465 |
| H | 3.95557  | -1.62574 | -1.94965 |
| H | -1.75140 | -0.02928 | 1.91594  |
| H | -1.93751 | 0.39968  | -1.91516 |
| O | -0.13041 | 1.29108  | -2.25269 |
| C | 0.16400  | 2.63528  | -1.85822 |
| C | 1.12999  | 2.72188  | -0.70631 |
| H | -0.75271 | 3.18912  | -1.63256 |
| H | 0.60403  | 3.06772  | -2.75958 |
| C | 0.89123  | 3.59278  | 0.35725  |
| C | 1.78527  | 3.66617  | 1.41988  |
| C | 2.91815  | 2.86049  | 1.43142  |
| C | 3.16514  | 1.99260  | 0.37127  |
| C | 2.28170  | 1.93197  | -0.69613 |
| H | -0.00471 | 4.20582  | 0.35779  |
| H | 1.59396  | 4.34922  | 2.24059  |
| H | 3.61136  | 2.91059  | 2.26438  |
| H | 4.04528  | 1.35871  | 0.37734  |
| H | 2.46448  | 1.24582  | -1.51460 |
| C | -3.21979 | 1.95208  | -0.19433 |
| C | -3.91664 | 0.69249  | 0.23106  |
| H | -3.23983 | 2.05704  | -1.28467 |
| H | -3.69425 | 2.83481  | 0.23728  |
| C | -4.33088 | -0.26039 | -0.70639 |
| C | -4.94830 | -1.43310 | -0.29394 |
| C | -5.17000 | -1.66431 | 1.06144  |
| C | -4.79953 | -0.70921 | 2.00253  |
| C | -4.18396 | 0.46453  | 1.59039  |

|   |          |          |          |
|---|----------|----------|----------|
| H | -4.18949 | -0.06659 | -1.76624 |
| H | -5.27548 | -2.16158 | -1.02831 |
| H | -5.65688 | -2.57903 | 1.38159  |
| H | -5.00527 | -0.87315 | 3.05450  |
| H | -3.91090 | 1.22327  | 2.31890  |
| H | 1.72799  | -2.45278 | -1.75776 |

Gal-oxo/conf\_5.out

Charge=+1, Multiplicity=+1

|   |          |          |          |
|---|----------|----------|----------|
| C | 0.40238  | -1.22383 | -1.41452 |
| C | 0.14545  | 0.18831  | -1.93770 |
| C | 1.25689  | 1.10838  | -1.46426 |
| O | -1.08595 | 0.64292  | -1.42747 |
| H | 0.15782  | 0.18368  | -3.03590 |
| O | 1.33192  | 1.07822  | 0.01651  |
| H | 2.24681  | 0.78116  | -1.78480 |
| C | 0.95783  | 2.54461  | -1.86483 |
| C | 0.98186  | 0.05616  | 0.66420  |
| C | 0.32347  | -1.16046 | 0.11708  |
| H | -0.73721 | -1.01195 | 0.39012  |
| O | 0.72704  | -2.28939 | 0.82620  |
| O | -0.36747 | 2.66564  | -2.33806 |
| H | 1.59296  | 2.83634  | -2.70178 |
| H | 1.15622  | 3.21249  | -1.01930 |
| C | -1.32418 | 2.05713  | -1.52650 |
| C | -1.41788 | 2.64783  | -0.13660 |
| C | -1.17426 | 4.00603  | 0.05427  |
| C | -1.27547 | 4.56226  | 1.32407  |
| C | -1.63545 | 3.76939  | 2.40770  |
| C | -1.90779 | 2.41927  | 2.21520  |
| C | -1.80229 | 1.86002  | 0.94703  |
| H | -0.90872 | 4.62888  | -0.79417 |
| H | -1.07917 | 5.61948  | 1.46551  |
| H | -1.71900 | 4.20633  | 3.39677  |
| H | -2.21822 | 1.80166  | 3.05172  |
| H | -2.04881 | 0.81499  | 0.79366  |
| H | 1.05486  | 0.17179  | 1.74278  |
| H | 1.43433  | -1.45672 | -1.69549 |



|   |          |          |          |
|---|----------|----------|----------|
| O | -0.33520 | -2.25511 | -1.98289 |
| C | -1.76609 | -2.17699 | -2.01865 |
| C | -2.43059 | -2.27170 | -0.67241 |
| H | -2.04334 | -3.03205 | -2.63891 |
| H | -2.08409 | -1.26638 | -2.53312 |
| C | -2.14647 | -3.33776 | 0.18371  |
| C | -2.76341 | -3.42501 | 1.42366  |
| C | -3.68345 | -2.45703 | 1.81662  |
| C | -3.98837 | -1.40362 | 0.96229  |
| C | -3.36069 | -1.31111 | -0.27533 |
| H | -1.42980 | -4.09227 | -0.12308 |
| H | -2.53509 | -4.25548 | 2.08292  |
| H | -4.17179 | -2.53247 | 2.78229  |
| H | -4.71683 | -0.65549 | 1.25703  |
| H | -3.59246 | -0.48694 | -0.94275 |
| C | 2.05086  | -2.73759 | 0.51866  |
| C | 3.05498  | -1.62894 | 0.65296  |
| H | 2.07919  | -3.17694 | -0.48409 |
| H | 2.23896  | -3.53353 | 1.24118  |
| C | 3.80360  | -1.18651 | -0.44308 |
| C | 4.70224  | -0.13727 | -0.30604 |
| C | 4.87167  | 0.47880  | 0.93166  |
| C | 4.16298  | 0.02571  | 2.03894  |
| C | 3.26515  | -1.02478 | 1.90267  |
| H | 3.69888  | -1.68903 | -1.40119 |
| H | 5.28611  | 0.19181  | -1.15923 |
| H | 5.57774  | 1.29522  | 1.03739  |
| H | 4.32188  | 0.48066  | 3.01040  |
| H | 2.72565  | -1.39889 | 2.76856  |
| H | -2.26764 | 2.17754  | -2.06568 |

Gal-6B/conf\_1.out

Charge=+1, Multiplicity=+1

|   |          |          |          |
|---|----------|----------|----------|
| C | -2.21760 | -1.79557 | -1.63515 |
| O | -3.48929 | -1.16737 | -1.60720 |
| C | -3.87365 | -1.33403 | -0.26016 |
| C | -1.30625 | -0.74228 | -1.01613 |
| H | -1.94138 | -2.00183 | -2.67000 |

|   |          |          |          |
|---|----------|----------|----------|
| C | -2.46915 | -3.04700 | -0.79864 |
| C | -1.60533 | -0.49308 | 0.45287  |
| H | -1.46637 | 0.18235  | -1.57440 |
| O | 0.10369  | -1.09956 | -1.18133 |
| C | -3.13242 | -0.31038 | 0.61327  |
| O | -1.13092 | -1.57019 | 1.21876  |
| H | -1.10052 | 0.43289  | 0.75450  |
| O | -3.59087 | 0.94917  | 0.19149  |
| H | -3.37807 | -0.49156 | 1.66953  |
| O | -3.50637 | -2.63985 | 0.09173  |
| H | -4.95360 | -1.19963 | -0.19016 |
| H | -1.60065 | -3.37409 | -0.22664 |
| H | -2.83762 | -3.85924 | -1.43058 |
| C | 0.95399  | -0.16474 | -1.02452 |
| C | 2.33254  | -0.37149 | -1.22142 |
| H | 0.58685  | 0.83527  | -0.77546 |
| C | 2.86515  | -1.63939 | -1.53411 |
| C | 4.21783  | -1.76225 | -1.75928 |
| C | 5.04314  | -0.63465 | -1.67718 |
| C | 4.52708  | 0.61834  | -1.35818 |
| C | 3.17212  | 0.75414  | -1.11998 |
| H | 2.20591  | -2.49755 | -1.59457 |
| H | 4.64523  | -2.72769 | -2.00379 |
| H | 6.10668  | -0.74106 | -1.86486 |
| H | 5.18332  | 1.47830  | -1.29508 |
| H | 2.74189  | 1.71759  | -0.86601 |
| C | -0.51648 | -1.19493 | 2.44594  |
| C | 0.92000  | -0.78692 | 2.26258  |
| H | -0.58326 | -2.07926 | 3.08265  |
| H | -1.08767 | -0.39293 | 2.93066  |
| C | 1.31639  | 0.54512  | 2.38020  |
| C | 2.65488  | 0.90252  | 2.25162  |
| C | 3.61058  | -0.07355 | 1.99974  |
| C | 3.22402  | -1.40577 | 1.86718  |
| C | 1.88819  | -1.75803 | 1.99533  |
| H | 0.57590  | 1.30501  | 2.60906  |
| H | 2.95227  | 1.93928  | 2.37056  |
| H | 4.65802  | 0.19753  | 1.92292  |

|   |          |          |          |
|---|----------|----------|----------|
| H | 3.97086  | -2.17155 | 1.68680  |
| H | 1.58983  | -2.79909 | 1.91278  |
| C | -3.07486 | 2.07398  | 0.87443  |
| C | -1.85213 | 2.64976  | 0.19752  |
| H | -3.87827 | 2.81706  | 0.87575  |
| H | -2.85600 | 1.83168  | 1.92357  |
| C | -1.77432 | 2.66917  | -1.19698 |
| C | -0.65303 | 3.18958  | -1.83355 |
| C | 0.40249  | 3.70407  | -1.08341 |
| C | 0.32320  | 3.70490  | 0.30510  |
| C | -0.79979 | 3.18145  | 0.93952  |
| H | -0.86182 | 3.19617  | 2.02445  |
| H | 1.26653  | 4.13157  | -1.58196 |
| H | 1.12936  | 4.12638  | 0.89687  |
| H | -2.60557 | 2.27850  | -1.77613 |
| H | -0.61143 | 3.21463  | -2.91777 |

Gal-6B/conf\_2.out

Charge=+1, Multiplicity=+1

|   |          |          |          |
|---|----------|----------|----------|
| C | 2.13718  | -1.32493 | 1.84247  |
| O | 3.41395  | -0.79359 | 1.51482  |
| C | 3.70000  | -1.43086 | 0.28311  |
| C | 1.19985  | -0.50092 | 0.97269  |
| H | 1.94464  | -1.16164 | 2.90358  |
| C | 2.29495  | -2.79367 | 1.46072  |
| C | 1.40184  | -0.73803 | -0.51741 |
| H | 1.39561  | 0.54724  | 1.20439  |
| O | -0.20002 | -0.74898 | 1.31756  |
| C | 2.91325  | -0.78860 | -0.86816 |
| O | 0.75856  | -1.94118 | -0.86140 |
| H | 0.95946  | 0.10301  | -1.06223 |
| O | 3.44420  | 0.42318  | -1.35140 |
| H | 2.99582  | -1.47315 | -1.71649 |
| O | 3.28533  | -2.76251 | 0.43679  |
| H | 4.77707  | -1.38237 | 0.11148  |
| H | 1.37792  | -3.23956 | 1.07298  |
| H | 2.67268  | -3.37369 | 2.30647  |
| C | -1.03449 | 0.15526  | 0.99379  |

|   |          |          |          |
|---|----------|----------|----------|
| C | -2.40989 | 0.03129  | 1.26821  |
| H | -0.65349 | 1.06456  | 0.51769  |
| C | -2.95897 | -1.13701 | 1.83627  |
| C | -4.30889 | -1.18323 | 2.10203  |
| C | -5.11498 | -0.07629 | 1.81047  |
| C | -4.58232 | 1.07752  | 1.24254  |
| C | -3.23008 | 1.13319  | 0.96024  |
| H | -2.31469 | -1.98127 | 2.05286  |
| H | -4.74951 | -2.07195 | 2.53858  |
| H | -6.17664 | -0.12068 | 2.03083  |
| H | -5.22356 | 1.92231  | 1.02068  |
| H | -2.78990 | 2.01758  | 0.51150  |
| C | 0.14591  | -1.91447 | -2.14872 |
| C | -1.17809 | -1.20038 | -2.12271 |
| H | 0.01222  | -2.96150 | -2.42523 |
| H | 0.82200  | -1.45699 | -2.88168 |
| C | -2.32028 | -1.86942 | -1.67720 |
| C | -3.55299 | -1.23217 | -1.66103 |
| C | -3.65927 | 0.09107  | -2.08231 |
| C | -2.52867 | 0.77210  | -2.51681 |
| C | -1.29574 | 0.12736  | -2.53862 |
| H | -2.24127 | -2.90665 | -1.36461 |
| H | -4.43703 | -1.77166 | -1.33801 |
| H | -4.62671 | 0.58175  | -2.09140 |
| H | -2.61081 | 1.79548  | -2.86825 |
| H | -0.42361 | 0.64809  | -2.92401 |
| C | 3.66452  | 1.51652  | -0.47070 |
| C | 2.41746  | 2.31137  | -0.16485 |
| H | 4.13928  | 1.19746  | 0.46087  |
| H | 4.37657  | 2.15156  | -1.00547 |
| C | 2.18832  | 2.80561  | 1.11952  |
| C | 1.03373  | 3.52799  | 1.40799  |
| C | 0.09231  | 3.76221  | 0.41051  |
| C | 0.32115  | 3.28644  | -0.87887 |
| C | 1.47905  | 2.57174  | -1.16424 |
| H | 1.66827  | 2.21101  | -2.17064 |
| H | -0.79928 | 4.34121  | 0.62942  |
| H | -0.39354 | 3.49369  | -1.66903 |

|   |         |         |         |
|---|---------|---------|---------|
| H | 2.91910 | 2.61875 | 1.90184 |
| H | 0.87400 | 3.91386 | 2.40936 |

Gal-6B/conf\_3.out

Charge=+1, Multiplicity=+1

|   |          |          |          |
|---|----------|----------|----------|
| C | 1.46596  | 2.24756  | -2.14146 |
| O | 2.52266  | 1.30458  | -2.16681 |
| C | 2.53914  | 0.83435  | -0.83645 |
| C | 0.14096  | 1.46561  | -2.03385 |
| H | 1.51225  | 2.84140  | -3.05272 |
| C | 1.81927  | 3.00533  | -0.87342 |
| C | 0.37898  | -0.01878 | -1.72173 |
| H | -0.47092 | 1.55569  | -2.93547 |
| O | -0.64791 | 1.97515  | -0.92390 |
| C | 1.45474  | -0.24890 | -0.65904 |
| O | -0.90280 | -0.49250 | -1.39520 |
| H | 0.74093  | -0.48928 | -2.64447 |
| O | 1.92651  | -1.55381 | -0.87650 |
| H | 1.03206  | -0.14345 | 0.34997  |
| O | 2.20736  | 1.94404  | -0.01430 |
| H | 3.53641  | 0.45875  | -0.61485 |
| H | 1.00230  | 3.56005  | -0.41403 |
| H | 2.65960  | 3.67707  | -1.07423 |
| C | -1.84947 | 1.53944  | -0.81931 |
| C | -2.53254 | 1.61707  | 0.41673  |
| H | -2.37494 | 1.22278  | -1.71784 |
| C | -1.87148 | 2.01411  | 1.59628  |
| C | -2.58073 | 2.06821  | 2.77666  |
| C | -3.93660 | 1.72451  | 2.79076  |
| C | -4.59037 | 1.31666  | 1.63097  |
| C | -3.89156 | 1.25721  | 0.44038  |
| H | -0.81795 | 2.26914  | 1.56222  |
| H | -2.09138 | 2.37544  | 3.69361  |
| H | -4.48633 | 1.77078  | 3.72519  |
| H | -5.63705 | 1.03906  | 1.66215  |
| H | -4.37647 | 0.91481  | -0.46820 |
| C | -1.07143 | -1.82490 | -0.89570 |
| C | -2.52263 | -1.97068 | -0.55732 |

|   |          |          |          |
|---|----------|----------|----------|
| H | -0.45164 | -1.97984 | -0.00928 |
| H | -0.75037 | -2.53099 | -1.66934 |
| C | -3.48624 | -1.91263 | -1.56563 |
| C | -4.83629 | -2.00268 | -1.25277 |
| C | -5.23485 | -2.16160 | 0.07222  |
| C | -4.27994 | -2.22803 | 1.07947  |
| C | -2.92911 | -2.12630 | 0.76465  |
| H | -3.17438 | -1.80933 | -2.60096 |
| H | -5.57881 | -1.97029 | -2.04311 |
| H | -6.28862 | -2.25036 | 0.31448  |
| H | -4.58552 | -2.36310 | 2.11150  |
| H | -2.18454 | -2.17484 | 1.55402  |
| C | 2.41639  | -2.22457 | 0.28523  |
| C | 3.66976  | -1.62052 | 0.84839  |
| H | 1.62966  | -2.24010 | 1.05418  |
| H | 2.58986  | -3.24992 | -0.04650 |
| C | 4.88293  | -1.78044 | 0.17653  |
| C | 6.03312  | -1.16478 | 0.64939  |
| C | 5.98304  | -0.38534 | 1.80233  |
| C | 4.78259  | -0.23134 | 2.48366  |
| C | 3.63116  | -0.84855 | 2.00653  |
| H | 2.69263  | -0.72687 | 2.54085  |
| H | 6.88282  | 0.09437  | 2.17201  |
| H | 4.74219  | 0.36875  | 3.38619  |
| H | 4.92035  | -2.38416 | -0.72547 |
| H | 6.97239  | -1.29530 | 0.12286  |

Gal-6B/conf\_4.out

Charge=+1, Multiplicity=+1

|   |          |         |          |
|---|----------|---------|----------|
| C | 0.14391  | 3.62517 | -1.38519 |
| O | 1.54561  | 3.41544 | -1.34926 |
| C | 1.74851  | 2.96379 | -0.02745 |
| C | -0.52843 | 2.23862 | -1.44523 |
| H | -0.09014 | 4.21983 | -2.26668 |
| C | -0.06000 | 4.36496 | -0.07223 |
| C | 0.45199  | 1.11283 | -1.06888 |
| H | -0.95062 | 2.03765 | -2.43422 |
| O | -1.61129 | 2.14311 | -0.48892 |

|   |          |          |          |
|---|----------|----------|----------|
| C | 1.38759  | 1.47191  | 0.07638  |
| O | -0.33163 | -0.00909 | -0.74890 |
| H | 1.07719  | 0.92072  | -1.94694 |
| O | 2.47200  | 0.59956  | -0.06409 |
| H | 0.87791  | 1.31089  | 1.03617  |
| O | 0.85460  | 3.70228  | 0.78835  |
| H | 2.78548  | 3.16496  | 0.24580  |
| H | -1.06457 | 4.29964  | 0.34459  |
| H | 0.22085  | 5.41481  | -0.19933 |
| C | -2.35937 | 1.10302  | -0.59031 |
| C | -3.14985 | 0.67396  | 0.49944  |
| H | -2.47514 | 0.63297  | -1.56519 |
| C | -3.03067 | 1.26428  | 1.77349  |
| C | -3.82215 | 0.80410  | 2.80325  |
| C | -4.72111 | -0.24321 | 2.57570  |
| C | -4.83079 | -0.84137 | 1.32289  |
| C | -4.04483 | -0.38863 | 0.28048  |
| H | -2.32078 | 2.06850  | 1.93016  |
| H | -3.74785 | 1.24845  | 3.78892  |
| H | -5.33932 | -0.59919 | 3.39337  |
| H | -5.52200 | -1.66098 | 1.16696  |
| H | -4.09807 | -0.85891 | -0.69646 |
| C | -0.02159 | -1.24346 | -1.41993 |
| C | -1.18693 | -2.16007 | -1.22228 |
| H | 0.90150  | -1.64148 | -0.98753 |
| H | 0.14636  | -1.04878 | -2.48521 |
| C | -1.39980 | -2.76566 | 0.01592  |
| C | -2.50650 | -3.57891 | 0.21837  |
| C | -3.41028 | -3.79790 | -0.81776 |
| C | -3.20454 | -3.20053 | -2.05627 |
| C | -2.09692 | -2.38179 | -2.25488 |
| H | -0.69037 | -2.60147 | 0.82135  |
| H | -2.65874 | -4.05480 | 1.18118  |
| H | -4.26476 | -4.44869 | -0.66493 |
| H | -3.89589 | -3.38431 | -2.87177 |
| H | -1.92567 | -1.93252 | -3.22965 |
| C | 3.23882  | 0.39938  | 1.12416  |
| C | 4.12613  | -0.78501 | 0.91067  |

|   |         |          |          |
|---|---------|----------|----------|
| H | 3.83171 | 1.29487  | 1.34903  |
| H | 2.55452 | 0.22307  | 1.96547  |
| C | 5.40590 | -0.62845 | 0.38462  |
| C | 6.20738 | -1.73749 | 0.14336  |
| C | 5.73321 | -3.01300 | 0.42719  |
| C | 4.45716 | -3.17807 | 0.95531  |
| C | 3.65891 | -2.06730 | 1.19474  |
| H | 2.66623 | -2.19373 | 1.61914  |
| H | 6.36099 | -3.87847 | 0.24454  |
| H | 4.09009 | -4.17193 | 1.18843  |
| H | 5.77748 | 0.36791  | 0.16416  |
| H | 7.20465 | -1.60636 | -0.26235 |

Gal-6B/conf\_5.out

Charge=+1, Multiplicity=+1

|   |          |          |          |
|---|----------|----------|----------|
| C | -1.70342 | -1.76367 | -1.49787 |
| O | -3.06455 | -1.62922 | -1.11408 |
| C | -3.06974 | -2.15699 | 0.19753  |
| C | -1.04969 | -0.55774 | -0.81791 |
| H | -1.63423 | -1.68389 | -2.58413 |
| C | -1.39299 | -3.16539 | -0.96835 |
| C | -1.10854 | -0.62127 | 0.70499  |
| H | -1.60936 | 0.31266  | -1.15540 |
| O | 0.30458  | -0.22772 | -1.23093 |
| C | -2.48470 | -1.16143 | 1.20379  |
| O | -0.05676 | -1.45468 | 1.13871  |
| H | -0.98262 | 0.39211  | 1.09332  |
| O | -3.37151 | -0.16767 | 1.64344  |
| H | -2.25590 | -1.73703 | 2.10498  |
| O | -2.24818 | -3.29864 | 0.15364  |
| H | -4.09317 | -2.43743 | 0.45345  |
| H | -0.36291 | -3.32530 | -0.64514 |
| H | -1.65476 | -3.91432 | -1.72168 |
| C | 1.28612  | -1.02157 | -1.06047 |
| C | 2.60826  | -0.58126 | -1.29852 |
| H | 1.09571  | -2.05335 | -0.78466 |
| C | 2.89948  | 0.76821  | -1.57637 |
| C | 4.20499  | 1.13704  | -1.82286 |



|   |          |          |          |
|---|----------|----------|----------|
| C | 5.21829  | 0.17656  | -1.78938 |
| C | 4.93918  | -1.15952 | -1.50350 |
| C | 3.63657  | -1.54165 | -1.25345 |
| H | 2.09808  | 1.49757  | -1.58643 |
| H | 4.44719  | 2.17123  | -2.03790 |
| H | 6.24248  | 0.47615  | -1.98636 |
| H | 5.73890  | -1.89029 | -1.47921 |
| H | 3.39880  | -2.57639 | -1.02687 |
| C | 0.52046  | -1.07057 | 2.39923  |
| C | 1.63365  | -0.08253 | 2.20968  |
| H | 0.89177  | -1.99560 | 2.84286  |
| H | -0.26550 | -0.67370 | 3.05073  |
| C | 1.38251  | 1.28802  | 2.11883  |
| C | 2.41785  | 2.18006  | 1.86848  |
| C | 3.72032  | 1.71285  | 1.72619  |
| C | 3.98518  | 0.35283  | 1.84010  |
| C | 2.94575  | -0.53748 | 2.07610  |
| H | 0.37629  | 1.66809  | 2.26881  |
| H | 2.21237  | 3.24359  | 1.80850  |
| H | 4.53113  | 2.41188  | 1.55051  |
| H | 5.00310  | -0.01254 | 1.75593  |
| H | 3.15459  | -1.59936 | 2.17401  |
| C | -4.15691 | 0.56369  | 0.70643  |
| C | -3.38676 | 1.62312  | -0.03546 |
| H | -4.65517 | -0.10096 | -0.00531 |
| H | -4.93145 | 1.02686  | 1.32333  |
| C | -2.50766 | 2.46422  | 0.64831  |
| C | -1.77510 | 3.42476  | -0.03727 |
| C | -1.92711 | 3.56794  | -1.41386 |
| C | -2.82273 | 2.75370  | -2.09782 |
| C | -3.54569 | 1.78315  | -1.41082 |
| H | -4.23148 | 1.13438  | -1.94792 |
| H | -1.36398 | 4.32582  | -1.94802 |
| H | -2.95868 | 2.87269  | -3.16757 |
| H | -2.40641 | 2.36162  | 1.72491  |
| H | -1.09881 | 4.07839  | 0.50435  |

Gal-6B/conf\_6.out

Charge=+1, Multiplicity=+1

|   |          |          |          |
|---|----------|----------|----------|
| C | 1.32224  | 3.03799  | -0.33040 |
| O | 2.27820  | 2.53262  | 0.59014  |
| C | 1.44918  | 1.95967  | 1.57912  |
| C | 0.64263  | 1.84120  | -1.03064 |
| H | 1.83744  | 3.68537  | -1.03768 |
| C | 0.39310  | 3.75271  | 0.63461  |
| C | 1.03691  | 0.49649  | -0.40719 |
| H | 0.84011  | 1.81970  | -2.10587 |
| O | -0.79739 | 1.93501  | -0.85711 |
| C | 1.01918  | 0.55431  | 1.13492  |
| O | 0.14497  | -0.41794 | -0.99863 |
| H | 2.05903  | 0.29127  | -0.74146 |
| O | 1.76790  | -0.47282 | 1.74341  |
| H | -0.00348 | 0.39954  | 1.48590  |
| O | 0.30925  | 2.79629  | 1.68279  |
| H | 1.98861  | 1.93818  | 2.52768  |
| H | -0.60821 | 3.96089  | 0.26150  |
| H | 0.86440  | 4.67764  | 0.98049  |
| C | -1.52609 | 1.15648  | -1.56470 |
| C | -2.85743 | 0.88253  | -1.17512 |
| H | -1.14523 | 0.81572  | -2.52622 |
| C | -3.30641 | 1.17221  | 0.12770  |
| C | -4.61080 | 0.88382  | 0.46729  |
| C | -5.46924 | 0.32382  | -0.48185 |
| C | -5.03007 | 0.03230  | -1.77208 |
| C | -3.71995 | 0.29704  | -2.11928 |
| H | -2.61936 | 1.59922  | 0.84990  |
| H | -4.96970 | 1.08617  | 1.46945  |
| H | -6.49568 | 0.10442  | -0.20662 |
| H | -5.71001 | -0.40522 | -2.49353 |
| H | -3.35505 | 0.06736  | -3.11558 |
| C | 0.11544  | -1.78980 | -0.53384 |
| C | -1.13588 | -2.07389 | 0.24200  |
| H | 1.00605  | -1.97885 | 0.06264  |
| H | 0.16004  | -2.39976 | -1.43868 |
| C | -1.14725 | -2.01066 | 1.63560  |
| C | -2.32323 | -2.24130 | 2.34002  |

|   |          |          |          |
|---|----------|----------|----------|
| C | -3.49617 | -2.54610 | 1.65864  |
| C | -3.48848 | -2.63158 | 0.27051  |
| C | -2.31301 | -2.39919 | -0.43134 |
| H | -0.22483 | -1.79825 | 2.16825  |
| H | -2.31984 | -2.19965 | 3.42404  |
| H | -4.41004 | -2.73980 | 2.21035  |
| H | -4.39497 | -2.89687 | -0.26333 |
| H | -2.30302 | -2.48881 | -1.51435 |
| C | 3.19978  | -0.40032 | 1.71452  |
| C | 3.81876  | -0.88746 | 0.43265  |
| H | 3.54591  | 0.61549  | 1.92849  |
| H | 3.50800  | -1.03604 | 2.54746  |
| C | 4.53145  | -0.01593 | -0.38948 |
| C | 5.08442  | -0.46594 | -1.58394 |
| C | 4.92648  | -1.79285 | -1.96616 |
| C | 4.22984  | -2.67311 | -1.14312 |
| C | 3.68549  | -2.22329 | 0.05235  |
| H | 3.16211  | -2.91680 | 0.70487  |
| H | 5.35994  | -2.14640 | -2.89547 |
| H | 4.12631  | -3.71497 | -1.42724 |
| H | 4.64809  | 1.02232  | -0.09168 |
| H | 5.64448  | 0.21800  | -2.21288 |

Gal-6B/conf\_7.out

Charge=+1, Multiplicity=+1

|   |          |          |          |
|---|----------|----------|----------|
| C | -1.15315 | -2.94586 | -0.27823 |
| O | -2.29679 | -2.10640 | -0.29315 |
| C | -1.90471 | -1.06340 | 0.57669  |
| C | -0.01441 | -2.22457 | -1.03254 |
| H | -1.41570 | -3.89226 | -0.74778 |
| C | -0.90727 | -3.01878 | 1.21815  |
| C | -0.38410 | -0.77955 | -1.38720 |
| H | 0.29827  | -2.76059 | -1.93282 |
| O | 1.14922  | -2.11628 | -0.16782 |
| C | -1.04636 | -0.05114 | -0.20207 |
| O | 0.81851  | -0.22942 | -1.86416 |
| H | -1.11450 | -0.84584 | -2.20351 |
| O | -1.73592 | 1.09847  | -0.63430 |

|   |          |          |          |
|---|----------|----------|----------|
| H | -0.27436 | 0.31637  | 0.47697  |
| O | -1.10890 | -1.66300 | 1.58856  |
| H | -2.79672 | -0.60744 | 1.00412  |
| H | 0.09286  | -3.32686 | 1.51927  |
| H | -1.65481 | -3.67117 | 1.67972  |
| C | 2.25840  | -1.77364 | -0.70355 |
| C | 3.30530  | -1.26395 | 0.09603  |
| H | 2.41339  | -1.98085 | -1.76140 |
| C | 3.06660  | -0.83348 | 1.41603  |
| C | 4.11540  | -0.33591 | 2.15878  |
| C | 5.39542  | -0.27645 | 1.60209  |
| C | 5.63757  | -0.69778 | 0.29550  |
| C | 4.59219  | -1.17977 | -0.46674 |
| H | 2.06267  | -0.88178 | 1.82332  |
| H | 3.94837  | 0.01302  | 3.17091  |
| H | 6.21581  | 0.11277  | 2.19620  |
| H | 6.63694  | -0.64021 | -0.11940 |
| H | 4.75709  | -1.50281 | -1.48994 |
| C | 0.90218  | 1.19096  | -2.14033 |
| C | 1.71703  | 1.89846  | -1.09837 |
| H | -0.10412 | 1.60411  | -2.20238 |
| H | 1.38180  | 1.26094  | -3.11898 |
| C | 3.10873  | 1.89787  | -1.19020 |
| C | 3.88235  | 2.51352  | -0.21513 |
| C | 3.26840  | 3.14255  | 0.86266  |
| C | 1.88120  | 3.16485  | 0.95276  |
| C | 1.10841  | 2.54953  | -0.02525 |
| H | 3.58903  | 1.42673  | -2.04371 |
| H | 4.96355  | 2.51918  | -0.30476 |
| H | 3.86974  | 3.63559  | 1.61921  |
| H | 1.39878  | 3.67698  | 1.77849  |
| H | 0.02458  | 2.58664  | 0.03074  |
| C | -2.98155 | 0.91899  | -1.31543 |
| C | -4.16483 | 0.89624  | -0.38676 |
| H | -3.05046 | 1.77337  | -1.99521 |
| H | -2.97386 | 0.00942  | -1.92706 |
| C | -4.28656 | 1.85831  | 0.61607  |
| C | -5.38132 | 1.84459  | 1.46914  |

|   |          |          |          |
|---|----------|----------|----------|
| C | -6.36895 | 0.87447  | 1.32302  |
| C | -6.25595 | -0.08208 | 0.32223  |
| C | -5.15455 | -0.07276 | -0.52718 |
| H | -5.05916 | -0.83224 | -1.29791 |
| H | -7.22508 | 0.86636  | 1.98885  |
| H | -7.02197 | -0.84110 | 0.20551  |
| H | -3.51413 | 2.61229  | 0.73026  |
| H | -5.46957 | 2.59531  | 2.24722  |

Gal-4B/conf\_1.out

Charge=+1, Multiplicity=+1

|   |          |          |          |
|---|----------|----------|----------|
| O | -0.54647 | -1.57371 | 0.78024  |
| C | -0.36277 | -0.52992 | -0.12841 |
| C | 0.05852  | -2.58585 | -0.03489 |
| O | -1.01203 | -1.00463 | -1.32575 |
| C | 1.46920  | -2.04479 | -0.25055 |
| C | 1.16132  | -0.52520 | -0.37191 |
| H | 1.92079  | -2.40012 | -1.18700 |
| O | 2.24343  | -2.41244 | 0.85176  |
| O | 1.56117  | -0.03986 | -1.61616 |
| H | 1.64325  | 0.00985  | 0.45217  |
| H | -0.83696 | 0.39196  | 0.19665  |
| C | -0.72381 | -2.39837 | -1.34978 |
| C | -2.05838 | -3.13246 | -1.46060 |
| H | -0.12074 | -2.64187 | -2.23045 |
| H | -0.00146 | -3.56163 | 0.44191  |
| C | 1.80059  | 1.36655  | -1.63904 |
| C | 0.58041  | 2.16841  | -1.28145 |
| H | 2.12565  | 1.57729  | -2.65962 |
| H | 2.62535  | 1.60265  | -0.95632 |
| C | -0.51065 | 2.21875  | -2.15029 |
| C | -1.66734 | 2.89650  | -1.78926 |
| C | -1.74805 | 3.52830  | -0.55063 |
| C | -0.66401 | 3.48961  | 0.31843  |
| C | 0.49591  | 2.81478  | -0.04972 |
| H | -0.44705 | 1.72156  | -3.11333 |
| H | -2.50005 | 2.95300  | -2.48370 |
| H | -2.64562 | 4.07158  | -0.27360 |

|   |          |          |          |
|---|----------|----------|----------|
| H | -0.71600 | 3.99456  | 1.27723  |
| H | 1.34658  | 2.78585  | 0.62601  |
| C | 3.64359  | -2.21922 | 0.69075  |
| C | 4.08166  | -0.78141 | 0.78995  |
| H | 3.96938  | -2.64527 | -0.26784 |
| H | 4.09575  | -2.80868 | 1.49198  |
| C | 4.78414  | -0.17608 | -0.24703 |
| C | 5.19417  | 1.15072  | -0.14505 |
| C | 4.88983  | 1.88600  | 0.99331  |
| C | 4.18349  | 1.28791  | 2.03491  |
| C | 3.78914  | -0.03921 | 1.93638  |
| H | 5.01216  | -0.74439 | -1.14409 |
| H | 5.74949  | 1.60875  | -0.95678 |
| H | 5.20968  | 2.91935  | 1.07548  |
| H | 3.24481  | -0.50897 | 2.75047  |
| H | 3.95673  | 1.85442  | 2.93222  |
| O | -2.93631 | -2.55674 | -0.48105 |
| H | -1.98227 | -4.19269 | -1.22688 |
| H | -2.49441 | -2.99708 | -2.45490 |
| C | -3.29064 | -1.34341 | -0.71225 |
| C | -3.73159 | -0.50226 | 0.33232  |
| H | -3.34729 | -1.00810 | -1.74667 |
| C | -4.27622 | 0.74889  | -0.01550 |
| C | -4.70320 | 1.60598  | 0.97901  |
| C | -4.57859 | 1.22363  | 2.31363  |
| C | -4.02393 | -0.00976 | 2.66673  |
| C | -3.59647 | -0.87721 | 1.68453  |
| H | -4.35372 | 1.03150  | -1.06025 |
| H | -5.13051 | 2.56887  | 0.72579  |
| H | -4.91284 | 1.89903  | 3.09442  |
| H | -3.92580 | -0.27963 | 3.71166  |
| H | -3.14106 | -1.82814 | 1.93159  |

Gal-4B/conf\_2.out

Charge=+1, Multiplicity=+1

|   |          |          |          |
|---|----------|----------|----------|
| O | -1.31869 | -0.01458 | -0.82230 |
| C | -1.16879 | -1.29705 | -0.30022 |
| C | -0.23365 | 0.56983  | -0.08210 |

|   |          |          |          |
|---|----------|----------|----------|
| O | -1.27177 | -1.09838 | 1.12260  |
| C | 0.96823  | -0.27951 | -0.51765 |
| C | 0.27689  | -1.66414 | -0.65529 |
| H | 1.73900  | -0.31941 | 0.25764  |
| O | 1.50471  | 0.11586  | -1.74663 |
| O | 0.72732  | -2.67752 | 0.18640  |
| H | 0.32147  | -1.95959 | -1.71260 |
| H | -1.95268 | -1.97797 | -0.62273 |
| C | -0.58961 | 0.13057  | 1.34939  |
| C | -1.51659 | 1.05385  | 2.12365  |
| H | 0.30537  | -0.03707 | 1.95856  |
| H | -0.17108 | 1.63874  | -0.26377 |
| C | 1.91650  | -3.32864 | -0.24453 |
| C | 3.16680  | -2.52543 | -0.00092 |
| H | 1.83600  | -3.58878 | -1.30803 |
| H | 1.94643  | -4.25832 | 0.32922  |
| C | 3.45223  | -2.05141 | 1.28149  |
| C | 4.60021  | -1.30803 | 1.51885  |
| C | 5.48703  | -1.04205 | 0.47760  |
| C | 5.21594  | -1.52065 | -0.79765 |
| C | 4.05550  | -2.25287 | -1.03553 |
| H | 2.76682  | -2.27321 | 2.09467  |
| H | 4.81746  | -0.95090 | 2.52038  |
| H | 6.39023  | -0.47108 | 0.66433  |
| H | 5.90514  | -1.32143 | -1.61146 |
| H | 3.83891  | -2.61179 | -2.03744 |
| C | 2.61360  | 1.01006  | -1.62441 |
| C | 2.27062  | 2.25832  | -0.86048 |
| H | 2.90040  | 1.24014  | -2.65182 |
| H | 3.44433  | 0.48494  | -1.13853 |
| C | 1.51389  | 3.26898  | -1.45512 |
| C | 1.09631  | 4.36703  | -0.71399 |
| C | 1.43420  | 4.46866  | 0.63358  |
| C | 2.20552  | 3.47713  | 1.22979  |
| C | 2.62317  | 2.37933  | 0.48290  |
| H | 1.24333  | 3.18547  | -2.50369 |
| H | 0.51546  | 5.15136  | -1.18792 |
| H | 1.11706  | 5.33189  | 1.20935  |

|   |          |          |          |
|---|----------|----------|----------|
| H | 3.23500  | 1.60767  | 0.94357  |
| H | 2.49651  | 3.56705  | 2.27151  |
| O | -2.76353 | 1.11329  | 1.40478  |
| H | -1.13788 | 2.07360  | 2.16928  |
| H | -1.70697 | 0.67164  | 3.13074  |
| C | -3.48849 | 0.06002  | 1.44784  |
| C | -4.49707 | -0.17125 | 0.48900  |
| H | -3.35708 | -0.62441 | 2.28524  |
| C | -5.37835 | -1.24899 | 0.70729  |
| C | -6.37432 | -1.51127 | -0.21210 |
| C | -6.48580 | -0.71029 | -1.34832 |
| C | -5.60645 | 0.35175  | -1.57820 |
| C | -4.60934 | 0.62731  | -0.66754 |
| H | -5.27205 | -1.86216 | 1.59682  |
| H | -7.06280 | -2.33294 | -0.05470 |
| H | -7.26668 | -0.91981 | -2.07207 |
| H | -5.70568 | 0.95128  | -2.47544 |
| H | -3.89941 | 1.42815  | -0.83391 |

Gal-4B/conf\_3.out

Charge=+1, Multiplicity=+1

|   |          |          |          |
|---|----------|----------|----------|
| O | 0.35446  | 1.78967  | -1.51956 |
| C | 0.10225  | 0.68115  | -0.70472 |
| C | 0.71637  | 2.67599  | -0.45202 |
| O | -0.88430 | 1.16125  | 0.22501  |
| C | 1.88233  | 1.96161  | 0.21965  |
| C | 1.43118  | 0.48443  | 0.05762  |
| H | 1.95950  | 2.19767  | 1.28993  |
| O | 3.04958  | 2.31509  | -0.45907 |
| O | 1.32845  | -0.12483 | 1.30641  |
| H | 2.13237  | -0.04258 | -0.59803 |
| H | -0.29850 | -0.16241 | -1.26054 |
| C | -0.53601 | 2.52824  | 0.43212  |
| C | -1.69148 | 3.38913  | -0.09074 |
| H | -0.35669 | 2.69864  | 1.49515  |
| H | 0.93637  | 3.67306  | -0.82881 |
| C | 1.38691  | -1.54744 | 1.26677  |
| C | 0.20136  | -2.15501 | 0.57046  |



|   |          |          |          |
|---|----------|----------|----------|
| H | 1.42331  | -1.85423 | 2.31411  |
| H | 2.32107  | -1.86057 | 0.78500  |
| C | 0.34650  | -2.80234 | -0.65443 |
| C | -0.76402 | -3.30882 | -1.32378 |
| C | -2.02984 | -3.17202 | -0.76632 |
| C | -2.18194 | -2.53349 | 0.46235  |
| C | -1.07308 | -2.02790 | 1.12477  |
| H | 1.33761  | -2.91091 | -1.08657 |
| H | -0.63870 | -3.81823 | -2.27335 |
| H | -2.89440 | -3.58169 | -1.27882 |
| H | -3.16598 | -2.44388 | 0.91085  |
| H | -1.18939 | -1.52443 | 2.07946  |
| C | 4.25760  | 1.94212  | 0.19424  |
| C | 4.58065  | 0.47439  | 0.09665  |
| H | 4.21896  | 2.24892  | 1.24823  |
| H | 5.03066  | 2.53428  | -0.30117 |
| C | 4.77053  | -0.29222 | 1.24195  |
| C | 5.07796  | -1.64657 | 1.14449  |
| C | 5.18352  | -2.24645 | -0.10381 |
| C | 4.99155  | -1.48618 | -1.25558 |
| C | 4.69954  | -0.13299 | -1.15535 |
| H | 4.67603  | 0.17145  | 2.21958  |
| H | 5.23309  | -2.23189 | 2.04474  |
| H | 5.42482  | -3.30120 | -0.18227 |
| H | 4.55640  | 0.46236  | -2.05242 |
| H | 5.08678  | -1.94791 | -2.23284 |
| O | -2.90943 | 2.66944  | 0.17419  |
| H | -1.60421 | 3.53873  | -1.17012 |
| H | -1.78115 | 4.34307  | 0.42406  |
| C | -3.07427 | 1.61395  | -0.53596 |
| C | -4.04401 | 0.64245  | -0.19781 |
| H | -2.54935 | 1.55011  | -1.48886 |
| C | -4.70618 | 0.65536  | 1.04499  |
| C | -5.66480 | -0.30020 | 1.30628  |
| C | -5.97332 | -1.26103 | 0.33795  |
| C | -5.31668 | -1.28411 | -0.88996 |
| C | -4.34206 | -0.34151 | -1.15784 |
| H | -4.45600 | 1.41216  | 1.77934  |

|   |          |          |          |
|---|----------|----------|----------|
| H | -6.18314 | -0.30620 | 2.25801  |
| H | -6.73563 | -2.00362 | 0.54979  |
| H | -5.56543 | -2.03800 | -1.62748 |
| H | -3.81183 | -0.35097 | -2.10473 |

Gal-4B/conf\_4.out

Charge=+1, Multiplicity=+1

|   |          |          |          |
|---|----------|----------|----------|
| O | -0.31588 | -1.40848 | 0.80639  |
| C | -0.49439 | -0.11958 | 0.30544  |
| C | 0.83964  | -1.71560 | 0.01305  |
| O | -0.59367 | -0.31553 | -1.11961 |
| C | 1.82522  | -0.62105 | 0.40533  |
| C | 0.85321  | 0.57334  | 0.60437  |
| H | 2.53647  | -0.38874 | -0.39718 |
| O | 2.48330  | -1.01460 | 1.57116  |
| O | 1.19282  | 1.63303  | -0.23558 |
| H | 0.85867  | 0.87429  | 1.66126  |
| H | -1.40809 | 0.34306  | 0.66747  |
| C | 0.31540  | -1.37671 | -1.39470 |
| C | -0.46848 | -2.46698 | -2.12107 |
| H | 1.11295  | -1.02660 | -2.05790 |
| H | 1.17695  | -2.73473 | 0.18665  |
| C | 0.60894  | 2.87972  | 0.12141  |
| C | -0.88520 | 2.91740  | -0.05785 |
| H | 1.09331  | 3.61036  | -0.52978 |
| H | 0.86841  | 3.12381  | 1.16078  |
| C | -1.43870 | 2.79310  | -1.33286 |
| C | -2.81588 | 2.80156  | -1.50629 |
| C | -3.65762 | 2.93066  | -0.40406 |
| C | -3.11604 | 3.05409  | 0.86969  |
| C | -1.73467 | 3.05023  | 1.03841  |
| H | -0.78109 | 2.69265  | -2.19049 |
| H | -3.23499 | 2.73344  | -2.50549 |
| H | -4.73382 | 2.96215  | -0.54179 |
| H | -3.76593 | 3.17008  | 1.73056  |
| H | -1.31228 | 3.15816  | 2.03378  |
| C | 3.54200  | -0.13511 | 1.94905  |
| C | 4.64452  | -0.08205 | 0.92922  |

|   |          |          |          |
|---|----------|----------|----------|
| H | 3.90087  | -0.53256 | 2.90019  |
| H | 3.15020  | 0.87492  | 2.13183  |
| C | 4.90275  | 1.08509  | 0.21494  |
| C | 5.91143  | 1.11980  | -0.74255 |
| C | 6.66495  | -0.01894 | -0.99653 |
| C | 6.41021  | -1.19167 | -0.29035 |
| C | 5.40625  | -1.22206 | 0.66731  |
| H | 4.30753  | 1.97304  | 0.40829  |
| H | 6.10855  | 2.03601  | -1.28884 |
| H | 7.45509  | 0.00650  | -1.73932 |
| H | 5.21041  | -2.13437 | 1.22313  |
| H | 7.00466  | -2.07912 | -0.48020 |
| O | -1.67512 | -2.69116 | -1.37472 |
| H | 0.05835  | -3.41876 | -2.15453 |
| H | -0.72994 | -2.14645 | -3.13392 |
| C | -2.52050 | -1.72461 | -1.39376 |
| C | -3.49022 | -1.58646 | -0.37786 |
| H | -2.53720 | -1.06590 | -2.26066 |
| C | -4.48096 | -0.59960 | -0.54509 |
| C | -5.43413 | -0.41885 | 0.43729  |
| C | -5.39668 | -1.21171 | 1.58307  |
| C | -4.40693 | -2.18263 | 1.76264  |
| C | -3.44895 | -2.37451 | 0.79070  |
| H | -4.48338 | 0.01557  | -1.43870 |
| H | -6.20424 | 0.33434  | 0.32100  |
| H | -6.14613 | -1.06822 | 2.35463  |
| H | -4.39080 | -2.77774 | 2.66813  |
| H | -2.65714 | -3.10260 | 0.91617  |

Gal-4B/conf\_5.out

Charge=+1, Multiplicity=+1

|   |          |         |          |
|---|----------|---------|----------|
| O | 0.01226  | 1.48351 | -0.66990 |
| C | -0.06133 | 0.62955 | 0.43550  |
| C | 0.43946  | 2.63985 | 0.06723  |
| O | -0.96733 | 1.31297 | 1.32464  |
| C | 1.74166  | 2.16250 | 0.72127  |
| C | 1.35349  | 0.69383 | 1.04793  |
| H | 1.93720  | 2.68549 | 1.65992  |

|   |          |          |          |
|---|----------|----------|----------|
| O | 2.89826  | 2.35919  | -0.04116 |
| O | 1.40687  | 0.46904  | 2.42414  |
| H | 2.00116  | 0.00286  | 0.50417  |
| H | -0.46983 | -0.34366 | 0.17851  |
| C | -0.64176 | 2.69005  | 1.16608  |
| C | -1.93870 | 3.41830  | 0.81746  |
| H | -0.25740 | 3.09549  | 2.10738  |
| H | 0.51021  | 3.51368  | -0.57813 |
| C | 1.61472  | -0.90017 | 2.76821  |
| C | 0.52982  | -1.79746 | 2.24029  |
| H | 1.64667  | -0.91452 | 3.85885  |
| H | 2.59102  | -1.22490 | 2.38624  |
| C | -0.74332 | -1.77341 | 2.81148  |
| C | -1.77134 | -2.53500 | 2.27175  |
| C | -1.53865 | -3.32468 | 1.14831  |
| C | -0.27272 | -3.35770 | 0.57535  |
| C | 0.75723  | -2.60048 | 1.12398  |
| H | -0.92385 | -1.15317 | 3.68421  |
| H | -2.75045 | -2.53151 | 2.74090  |
| H | -2.33718 | -3.93199 | 0.73469  |
| H | -0.08194 | -3.98112 | -0.29189 |
| H | 1.74464  | -2.62481 | 0.67136  |
| C | 2.94121  | 1.89098  | -1.38710 |
| C | 3.13830  | 0.40262  | -1.51479 |
| H | 3.79699  | 2.41814  | -1.81569 |
| H | 2.04982  | 2.19803  | -1.94440 |
| C | 4.22168  | -0.21262 | -0.88477 |
| C | 4.39705  | -1.58700 | -0.97065 |
| C | 3.49727  | -2.36228 | -1.69873 |
| C | 2.42448  | -1.75498 | -2.33960 |
| C | 2.24525  | -0.37823 | -2.24378 |
| H | 4.91930  | 0.39262  | -0.31400 |
| H | 5.24358  | -2.05571 | -0.47996 |
| H | 3.64157  | -3.43502 | -1.77378 |
| H | 1.39805  | 0.09624  | -2.72977 |
| H | 1.72659  | -2.35341 | -2.91626 |
| O | -2.58277 | 2.65260  | -0.21261 |
| H | -1.77377 | 4.41420  | 0.41077  |

|   |          |          |          |
|---|----------|----------|----------|
| H | -2.59909 | 3.47332  | 1.68807  |
| C | -3.01199 | 1.49920  | 0.15927  |
| C | -3.22236 | 0.46332  | -0.77785 |
| H | -3.32221 | 1.37053  | 1.19500  |
| C | -3.85905 | -0.70942 | -0.32952 |
| C | -4.06765 | -1.75132 | -1.21146 |
| C | -3.63584 | -1.62966 | -2.53076 |
| C | -2.98926 | -0.47414 | -2.97885 |
| C | -2.77649 | 0.57471  | -2.11020 |
| H | -4.17790 | -0.78819 | 0.70465  |
| H | -4.56250 | -2.65687 | -0.88137 |
| H | -3.80027 | -2.44916 | -3.22279 |
| H | -2.65476 | -0.40615 | -4.00745 |
| H | -2.26083 | 1.47296  | -2.42633 |

Gal-4B/conf\_6.out

Charge=+1, Multiplicity=+1

|   |          |          |          |
|---|----------|----------|----------|
| O | -0.84229 | -1.56348 | -1.05965 |
| C | -0.35187 | -0.58480 | -0.18345 |
| C | -0.97242 | -2.59350 | -0.06660 |
| O | 0.80943  | -1.20292 | 0.39436  |
| C | -1.90784 | -1.96973 | 0.97328  |
| C | -1.43946 | -0.49130 | 0.90803  |
| H | -1.69923 | -2.35010 | 1.97559  |
| O | -3.26874 | -2.22240 | 0.77328  |
| O | -0.99592 | -0.07484 | 2.16307  |
| H | -2.24427 | 0.14817  | 0.53913  |
| H | -0.06686 | 0.32703  | -0.70113 |
| C | 0.46328  | -2.58235 | 0.49300  |
| C | 1.42341  | -3.36395 | -0.40986 |
| H | 0.53880  | -2.90244 | 1.53367  |
| H | -1.30270 | -3.53037 | -0.51357 |
| C | -1.05454 | 1.33710  | 2.34795  |
| C | -0.14082 | 2.07379  | 1.40898  |
| H | -0.76418 | 1.49717  | 3.38780  |
| H | -2.08934 | 1.67941  | 2.21836  |
| C | 1.24193  | 1.98627  | 1.57356  |
| C | 2.09828  | 2.59311  | 0.66604  |

|   |          |          |          |
|---|----------|----------|----------|
| C | 1.58040  | 3.29076  | -0.42267 |
| C | 0.20375  | 3.38745  | -0.59179 |
| C | -0.65246 | 2.78321  | 0.32404  |
| H | 1.64317  | 1.43480  | 2.41837  |
| H | 3.17136  | 2.53554  | 0.81519  |
| H | 2.24809  | 3.77796  | -1.12628 |
| H | -0.20475 | 3.94164  | -1.43030 |
| H | -1.72839 | 2.85415  | 0.18822  |
| C | -3.85873 | -1.91687 | -0.48908 |
| C | -4.11669 | -0.44808 | -0.70185 |
| H | -4.80310 | -2.46616 | -0.47227 |
| H | -3.25870 | -2.31359 | -1.31533 |
| C | -4.84542 | 0.27452  | 0.24464  |
| C | -5.04638 | 1.63855  | 0.08410  |
| C | -4.53186 | 2.29426  | -1.03228 |
| C | -3.82186 | 1.57745  | -1.98772 |
| C | -3.61323 | 0.21165  | -1.81986 |
| H | -5.23777 | -0.23681 | 1.11829  |
| H | -5.61460 | 2.19211  | 0.82426  |
| H | -4.69744 | 3.35879  | -1.16107 |
| H | -3.04252 | -0.34597 | -2.55648 |
| H | -3.43039 | 2.08091  | -2.86568 |
| O | 2.70209  | -2.70743 | -0.33211 |
| H | 1.08319  | -3.34036 | -1.44861 |
| H | 1.58381  | -4.38790 | -0.07977 |
| C | 2.75034  | -1.55556 | -0.89529 |
| C | 3.80732  | -0.65314 | -0.63859 |
| H | 2.03184  | -1.34057 | -1.68573 |
| C | 3.91450  | 0.47751  | -1.46887 |
| C | 4.95315  | 1.36881  | -1.27808 |
| C | 5.86803  | 1.14560  | -0.25174 |
| C | 5.75516  | 0.03496  | 0.59052  |
| C | 4.73144  | -0.86873 | 0.40219  |
| H | 3.18538  | 0.64124  | -2.25592 |
| H | 5.05327  | 2.23711  | -1.91862 |
| H | 6.68155  | 1.84744  | -0.09987 |
| H | 6.47453  | -0.11471 | 1.38712  |
| H | 4.62802  | -1.73790 | 1.04132  |

Man-oxo/conf\_1.out

Charge=+1, Multiplicity=+1

|   |          |          |          |
|---|----------|----------|----------|
| C | -0.53178 | -1.17253 | -0.61448 |
| C | -0.84509 | 0.31332  | -0.43674 |
| C | -0.46624 | 0.84036  | 0.94617  |
| H | -1.91614 | 0.47741  | -0.57804 |
| O | -0.09934 | 1.04895  | -1.37278 |
| O | -1.00654 | -0.03378 | 1.98526  |
| H | 0.62094  | 0.81346  | 1.07287  |
| C | -1.00767 | 2.25275  | 1.08470  |
| C | -0.72141 | -1.26048 | 1.85699  |
| C | 0.07099  | -1.74121 | 0.74155  |
| O | 0.18753  | -3.10840 | 0.81426  |
| H | 1.06002  | -1.23313 | 0.80332  |
| H | -1.09322 | -1.91782 | 2.64271  |
| C | 1.09605  | -3.67292 | -0.15552 |
| H | 0.26359  | -1.25264 | -1.35730 |
| O | -1.55091 | -1.99582 | -1.06495 |
| C | -2.67534 | -2.20235 | -0.23133 |
| O | -1.10838 | 2.80467  | -0.21859 |
| H | -0.37022 | 2.86494  | 1.72914  |
| H | -2.02395 | 2.22623  | 1.48494  |
| C | -0.05175 | 2.45017  | -1.07207 |
| C | 1.30718  | 2.82967  | -0.52060 |
| H | -0.25731 | 2.97085  | -2.00931 |
| C | 1.47828  | 4.10445  | 0.01998  |
| C | 2.71001  | 4.48483  | 0.53490  |
| C | 3.78143  | 3.59711  | 0.51020  |
| C | 3.61805  | 2.33217  | -0.04020 |
| C | 2.38603  | 1.94889  | -0.55942 |
| H | 0.64178  | 4.79652  | 0.03749  |
| H | 2.83576  | 5.47697  | 0.95447  |
| H | 4.74336  | 3.89668  | 0.91166  |
| H | 4.45198  | 1.63929  | -0.07411 |
| H | 2.26690  | 0.96894  | -1.00872 |
| C | 2.39955  | -2.93028 | -0.20980 |
| H | 0.60748  | -3.68510 | -1.13488 |

|   |          |          |          |
|---|----------|----------|----------|
| H | 1.22640  | -4.70256 | 0.17926  |
| C | 3.19544  | -2.81972 | 0.93443  |
| C | 4.38042  | -2.09781 | 0.89772  |
| C | 4.78806  | -1.48656 | -0.28514 |
| C | 4.00856  | -1.59841 | -1.42976 |
| C | 2.81574  | -2.31298 | -1.38888 |
| H | 2.88577  | -3.31110 | 1.85255  |
| H | 4.99679  | -2.02460 | 1.78717  |
| H | 5.72342  | -0.93790 | -0.31666 |
| H | 4.32988  | -1.13529 | -2.35646 |
| H | 2.21388  | -2.40930 | -2.28877 |
| C | -3.66284 | -1.06828 | -0.19712 |
| H | -2.33601 | -2.44509 | 0.79570  |
| H | -3.13826 | -3.11571 | -0.61361 |
| C | -4.16604 | -0.59901 | 1.01291  |
| C | -5.08045 | 0.44971  | 1.03780  |
| C | -5.49080 | 1.03818  | -0.15124 |
| C | -4.99952 | 0.56530  | -1.36546 |
| C | -4.09496 | -0.48631 | -1.39029 |
| H | -3.85586 | -1.06072 | 1.94702  |
| H | -5.47228 | 0.80403  | 1.98516  |
| H | -6.19935 | 1.85892  | -0.13515 |
| H | -5.32766 | 1.01586  | -2.29574 |
| H | -3.70798 | -0.85260 | -2.33608 |

Man-oxo/conf\_2.out

Charge=+1, Multiplicity=+1

|   |          |          |          |
|---|----------|----------|----------|
| C | 0.99024  | -0.49274 | -0.40687 |
| C | -0.17207 | -0.24624 | 0.53802  |
| C | 0.28329  | 0.23033  | 1.91252  |
| H | -0.70735 | -1.19426 | 0.70618  |
| O | -1.03561 | 0.70587  | -0.00186 |
| O | 1.06873  | -0.85821 | 2.50839  |
| H | 0.93364  | 1.10977  | 1.86074  |
| C | -0.93982 | 0.47996  | 2.77844  |
| C | 1.95503  | -1.37518 | 1.77144  |
| C | 2.28510  | -0.85025 | 0.46136  |
| O | 3.18949  | -1.69009 | -0.14248 |



|   |          |          |          |
|---|----------|----------|----------|
| H | 2.73637  | 0.15071  | 0.67423  |
| H | 2.48714  | -2.22478 | 2.20182  |
| C | 3.89332  | -1.09326 | -1.25815 |
| H | 1.21303  | 0.43705  | -0.93511 |
| O | 0.80027  | -1.44792 | -1.38607 |
| C | 0.36460  | -2.73707 | -0.98144 |
| O | -1.76855 | 1.37776  | 2.08706  |
| H | -0.68016 | 0.93590  | 3.73443  |
| H | -1.45135 | -0.47700 | 2.96360  |
| C | -2.17753 | 0.87831  | 0.83301  |
| C | -3.11615 | 1.83685  | 0.18481  |
| H | -2.64834 | -0.10877 | 0.97085  |
| C | -4.38383 | 1.40626  | -0.18954 |
| C | -5.26575 | 2.28944  | -0.80121 |
| C | -4.87713 | 3.60197  | -1.03725 |
| C | -3.60823 | 4.03330  | -0.66073 |
| C | -2.72689 | 3.15337  | -0.05017 |
| H | -4.68283 | 0.37970  | 0.00044  |
| H | -6.25606 | 1.95437  | -1.08933 |
| H | -5.56464 | 4.29321  | -1.51253 |
| H | -3.30893 | 5.05982  | -0.84193 |
| H | -1.73950 | 3.48547  | 0.25092  |
| C | 4.43560  | 0.25987  | -0.91163 |
| H | 3.21494  | -1.04300 | -2.11424 |
| H | 4.68561  | -1.80965 | -1.47626 |
| C | 3.94030  | 1.40392  | -1.53884 |
| C | 4.41638  | 2.66319  | -1.18872 |
| C | 5.38611  | 2.78643  | -0.20161 |
| C | 5.88780  | 1.65034  | 0.42953  |
| C | 5.41760  | 0.39410  | 0.07503  |
| H | 3.19436  | 1.30552  | -2.32319 |
| H | 4.03524  | 3.54527  | -1.69146 |
| H | 5.76204  | 3.76683  | 0.06995  |
| H | 6.65718  | 1.74652  | 1.18791  |
| H | 5.81884  | -0.49345 | 0.55608  |
| C | -1.12683 | -2.83897 | -0.78606 |
| H | 0.89631  | -3.04796 | -0.06586 |
| H | 0.70002  | -3.40619 | -1.77787 |

|   |          |          |          |
|---|----------|----------|----------|
| C | -1.99467 | -2.08695 | -1.57598 |
| C | -3.36795 | -2.18436 | -1.38899 |
| C | -3.88490 | -3.03614 | -0.41829 |
| C | -3.02281 | -3.79574 | 0.36530  |
| C | -1.64846 | -3.69478 | 0.18315  |
| H | -1.59245 | -1.41415 | -2.32532 |
| H | -4.03538 | -1.59484 | -2.00849 |
| H | -4.95751 | -3.11462 | -0.27718 |
| H | -3.42037 | -4.46703 | 1.11880  |
| H | -0.97859 | -4.28928 | 0.79960  |

Man-oxo/conf\_3.out

Charge=+1, Multiplicity=+1

|   |          |          |          |
|---|----------|----------|----------|
| C | 1.28291  | -0.28164 | 0.01619  |
| C | -0.03345 | -0.37851 | 0.76656  |
| C | 0.13125  | -0.21140 | 2.27295  |
| H | -0.46119 | -1.38273 | 0.62030  |
| O | -0.91946 | 0.59376  | 0.30324  |
| O | 0.95042  | -1.33827 | 2.73670  |
| H | 0.65618  | 0.71097  | 2.54181  |
| C | -1.23562 | -0.29632 | 2.93031  |
| C | 2.01074  | -1.56184 | 2.08589  |
| C | 2.47920  | -0.69086 | 1.02147  |
| O | 3.56535  | -1.25884 | 0.40002  |
| H | 2.70896  | 0.27976  | 1.50874  |
| H | 2.56591  | -2.45186 | 2.38606  |
| C | 4.67052  | -0.35981 | 0.12976  |
| H | 1.46556  | 0.75865  | -0.26074 |
| O | 1.37958  | -1.00687 | -1.14916 |
| C | 1.09509  | -2.39362 | -1.09339 |
| O | -2.05638 | 0.66366  | 2.31737  |
| H | -1.19512 | -0.06734 | 3.99578  |
| H | -1.63697 | -1.31244 | 2.79582  |
| C | -2.19108 | 0.45182  | 0.92927  |
| C | -3.13324 | 1.45095  | 0.35101  |
| H | -2.54305 | -0.57753 | 0.75144  |
| C | -4.24493 | 1.01244  | -0.35917 |
| C | -5.12602 | 1.93504  | -0.91093 |

|   |          |          |          |
|---|----------|----------|----------|
| C | -4.89271 | 3.29496  | -0.75077 |
| C | -3.78002 | 3.73375  | -0.03849 |
| C | -2.89950 | 2.81449  | 0.51237  |
| H | -4.42385 | -0.05214 | -0.47783 |
| H | -5.99547 | 1.59258  | -1.46117 |
| H | -5.58054 | 4.01646  | -1.17824 |
| H | -3.60271 | 4.79605  | 0.08908  |
| H | -2.03430 | 3.15025  | 1.07320  |
| C | 4.22257  | 0.93386  | -0.47318 |
| H | 5.30928  | -0.93094 | -0.54334 |
| H | 5.21255  | -0.18651 | 1.06650  |
| C | 3.81397  | 0.98897  | -1.80700 |
| C | 3.31352  | 2.16972  | -2.33597 |
| C | 3.21435  | 3.30697  | -1.53798 |
| C | 3.63231  | 3.26689  | -0.21355 |
| C | 4.13846  | 2.08343  | 0.31493  |
| H | 3.87770  | 0.09954  | -2.42500 |
| H | 3.00112  | 2.20710  | -3.37376 |
| H | 2.82364  | 4.22863  | -1.95524 |
| H | 3.57777  | 4.15744  | 0.40298  |
| H | 4.49660  | 2.06052  | 1.34167  |
| C | -0.37489 | -2.71630 | -1.18844 |
| H | 1.52729  | -2.83406 | -0.17691 |
| H | 1.64429  | -2.82725 | -1.93298 |
| C | -0.89436 | -3.82615 | -0.52391 |
| C | -2.24864 | -4.12726 | -0.61150 |
| C | -3.09355 | -3.31629 | -1.36153 |
| C | -2.57750 | -2.21070 | -2.02980 |
| C | -1.22323 | -1.91169 | -1.94746 |
| H | -0.23854 | -4.46207 | 0.06571  |
| H | -2.64409 | -4.99449 | -0.09385 |
| H | -4.15034 | -3.55064 | -1.43045 |
| H | -3.22991 | -1.57896 | -2.62323 |
| H | -0.82366 | -1.04205 | -2.45755 |

Man-oxo/conf\_4.out

Charge=+1, Multiplicity=+1

|   |             |             |             |
|---|-------------|-------------|-------------|
| C | -0.66118500 | -1.55199300 | -1.32204100 |
|---|-------------|-------------|-------------|

|   |             |             |             |
|---|-------------|-------------|-------------|
| C | -0.06034200 | -2.91000900 | -1.00392700 |
| O | 1.32933000  | -2.73559200 | -0.88586900 |
| C | 1.66988700  | -1.81727600 | 0.12807800  |
| C | 3.15131700  | -1.67572800 | 0.23239900  |
| C | 3.89951700  | -1.33037200 | -0.88981900 |
| C | 5.26774800  | -1.13642700 | -0.77261200 |
| C | 5.89084500  | -1.28258300 | 0.46368400  |
| C | 5.14446700  | -1.62939700 | 1.58306000  |
| C | 3.77311300  | -1.82564500 | 1.46621100  |
| H | 3.18716000  | -2.09523000 | 2.34013700  |
| H | 5.62918700  | -1.75126900 | 2.54552300  |
| H | 6.96151100  | -1.13219200 | 0.55200200  |
| H | 5.85258200  | -0.87105700 | -1.64670300 |
| H | 3.40803700  | -1.21161600 | -1.84879900 |
| O | 1.13316100  | -0.54067200 | -0.17716500 |
| C | -0.25925500 | -0.56197900 | -0.24803600 |
| C | -0.77241200 | 0.83590900  | -0.52640300 |
| C | -2.15339100 | 0.75180100  | -1.27690500 |
| C | -2.79349700 | -0.58998700 | -1.23886600 |
| O | -2.12172300 | -1.66086900 | -1.34765700 |
| H | -3.86698100 | -0.72168400 | -1.35915700 |
| O | -3.03168900 | 1.80327400  | -1.10445800 |
| C | -3.71348100 | 1.94315600  | 0.17065300  |
| C | -4.32421100 | 0.64860700  | 0.59597300  |
| C | -5.61149700 | 0.29296500  | 0.18540300  |
| C | -6.10867200 | -0.97261300 | 0.46183600  |
| C | -5.32444100 | -1.90356900 | 1.14667000  |
| C | -4.05322400 | -1.55574200 | 1.57814700  |
| C | -3.55110200 | -0.28203500 | 1.30451400  |
| H | -2.57795800 | 0.02391700  | 1.67707000  |
| H | -3.45488000 | -2.26609300 | 2.13867900  |
| H | -5.71947500 | -2.89117200 | 1.35769200  |
| H | -7.11136200 | -1.24036700 | 0.14658100  |
| H | -6.21869300 | 1.01173000  | -0.35614500 |
| H | -4.47352200 | 2.69640000  | -0.03375100 |
| H | -3.01456000 | 2.31574000  | 0.91697500  |
| H | -1.89246100 | 0.79783000  | -2.35520000 |
| O | -0.87727300 | 1.53358200  | 0.67090900  |

|   |             |             |             |
|---|-------------|-------------|-------------|
| C | -0.23752500 | 2.83145400  | 0.68639800  |
| C | 1.23098000  | 2.73965600  | 0.40662300  |
| C | 1.75935300  | 3.23871300  | -0.78198800 |
| C | 3.11130000  | 3.08420300  | -1.07273100 |
| C | 3.93924300  | 2.42153400  | -0.17651200 |
| C | 3.42066700  | 1.92755400  | 1.01699700  |
| C | 2.07563600  | 2.09075300  | 1.30816900  |
| H | 1.66929800  | 1.69768500  | 2.23532400  |
| H | 4.06890900  | 1.40802200  | 1.71409500  |
| H | 4.99173500  | 2.29025500  | -0.40278900 |
| H | 3.51503000  | 3.48129100  | -1.99786700 |
| H | 1.11213000  | 3.76265700  | -1.48102800 |
| H | -0.43570300 | 3.20445000  | 1.69271900  |
| H | -0.73586900 | 3.48984700  | -0.03440000 |
| H | -0.05786100 | 1.32343900  | -1.19813500 |
| H | -0.69247000 | -0.90300100 | 0.70786100  |
| H | 1.23250900  | -2.16008900 | 1.08117600  |
| H | -0.23742700 | -3.63342700 | -1.80049400 |
| H | -0.49742600 | -3.29375100 | -0.06902000 |
| H | -0.35492200 | -1.21578400 | -2.31827500 |

Man-oxo/conf\_5.out

Charge=+1, Multiplicity=+1

|   |          |          |          |
|---|----------|----------|----------|
| C | -0.39099 | -1.12613 | -0.19400 |
| C | -0.61141 | 0.38416  | -0.27828 |
| C | -0.35034 | 1.10063  | 1.04485  |
| H | -1.64645 | 0.58592  | -0.56469 |
| O | 0.27958  | 0.91913  | -1.22211 |
| O | -1.10350 | 0.44571  | 2.11446  |
| H | 0.70531  | 1.01622  | 1.32255  |
| C | -0.77917 | 2.55155  | 0.89976  |
| C | -0.92291 | -0.80291 | 2.21694  |
| C | -0.03855 | -1.52750 | 1.31906  |
| O | -0.10740 | -2.87814 | 1.56752  |
| H | 0.97810  | -1.10519 | 1.43784  |
| H | -1.47716 | -1.29606 | 3.01551  |
| C | 1.16456  | -3.56855 | 1.58487  |
| H | 0.49704  | -1.37652 | -0.77589 |

|   |          |          |          |
|---|----------|----------|----------|
| O | -1.39766 | -1.93997 | -0.67597 |
| C | -2.64018 | -1.95788 | -0.00219 |
| O | -0.71847 | 2.89002  | -0.47566 |
| H | -0.15338 | 3.21594  | 1.50258  |
| H | -1.82539 | 2.66061  | 1.19479  |
| C | 0.38701  | 2.34646  | -1.14763 |
| C | 1.71099  | 2.74339  | -0.52881 |
| H | 0.30423  | 2.71404  | -2.17243 |
| C | 2.73944  | 1.81950  | -0.35622 |
| C | 3.94740  | 2.21957  | 0.20579  |
| C | 4.13588  | 3.54081  | 0.59166  |
| C | 3.11520  | 4.46822  | 0.40609  |
| C | 1.90870  | 4.07297  | -0.15541 |
| H | 2.59838  | 0.79402  | -0.67991 |
| H | 4.74878  | 1.49894  | 0.33224  |
| H | 5.07946  | 3.85198  | 1.02639  |
| H | 3.26198  | 5.50302  | 0.69564  |
| H | 1.11322  | 4.79651  | -0.30595 |
| C | 2.00263  | -3.25274 | 0.38500  |
| H | 0.88718  | -4.62148 | 1.62824  |
| H | 1.69282  | -3.30669 | 2.50910  |
| C | 1.66576  | -3.77291 | -0.86661 |
| C | 2.38848  | -3.40755 | -1.99311 |
| C | 3.45585  | -2.51946 | -1.88133 |
| C | 3.80803  | -2.00912 | -0.63832 |
| C | 3.08327  | -2.37654 | 0.49138  |
| H | 0.82658  | -4.45578 | -0.95562 |
| H | 2.12324  | -3.81700 | -2.96162 |
| H | 4.02039  | -2.23748 | -2.76336 |
| H | 4.65460  | -1.33716 | -0.54575 |
| H | 3.37498  | -1.99587 | 1.46745  |
| C | -3.53399 | -0.77777 | -0.27138 |
| H | -2.46919 | -2.06594 | 1.08780  |
| H | -3.11445 | -2.88956 | -0.32100 |
| C | -4.16484 | -0.10916 | 0.77386  |
| C | -4.99181 | 0.98041  | 0.51802  |
| C | -5.18628 | 1.40959  | -0.78833 |
| C | -4.56660 | 0.73776  | -1.83894 |

|   |          |          |          |
|---|----------|----------|----------|
| C | -3.74924 | -0.35390 | -1.58394 |
| H | -4.02432 | -0.44554 | 1.79819  |
| H | -5.48429 | 1.49096  | 1.33861  |
| H | -5.82614 | 2.26132  | -0.99092 |
| H | -4.72601 | 1.06451  | -2.86069 |
| H | -3.26130 | -0.87502 | -2.40173 |

Man-6B/conf\_1.out

Charge=+1, Multiplicity=+1

|   |          |          |          |
|---|----------|----------|----------|
| C | -0.41539 | 3.08982  | 0.43365  |
| O | -0.93658 | 2.59529  | 1.65423  |
| C | -2.21613 | 2.15484  | 1.23612  |
| C | -2.05325 | 0.88214  | 0.32142  |
| O | -2.61107 | 1.05507  | -0.94665 |
| C | 0.08054  | 1.90354  | -0.39135 |
| O | -0.25391 | -0.39026 | -0.78997 |
| O | 1.52290  | 1.74800  | -0.18532 |
| H | 0.39809  | 3.78275  | 0.64941  |
| C | -1.64846 | 3.77164  | -0.20519 |
| O | -2.74348 | 3.22221  | 0.51496  |
| H | -2.82729 | 1.97265  | 2.11885  |
| H | -1.74636 | 3.55185  | -1.27187 |
| H | -1.63691 | 4.85063  | -0.04482 |
| C | -4.01698 | 0.81269  | -1.01019 |
| C | -4.35851 | -0.60409 | -0.64089 |
| H | -4.28416 | 1.02387  | -2.04781 |
| H | -4.55254 | 1.52544  | -0.37295 |
| C | -3.76533 | -1.66362 | -1.33057 |
| C | -4.05065 | -2.97612 | -0.98237 |
| C | -4.93570 | -3.24576 | 0.05893  |
| C | -5.53276 | -2.19795 | 0.74725  |
| C | -5.24038 | -0.88212 | 0.39977  |
| H | -3.07684 | -1.44803 | -2.14226 |
| H | -3.59467 | -3.79444 | -1.53028 |
| H | -5.16369 | -4.27192 | 0.32650  |
| H | -6.22609 | -2.40275 | 1.55589  |
| H | -5.70811 | -0.06303 | 0.93937  |
| C | -0.21485 | -1.70438 | -0.21261 |

|   |          |          |          |
|---|----------|----------|----------|
| C | 1.11661  | -1.97431 | 0.42449  |
| H | -1.03842 | -1.82110 | 0.49958  |
| H | -0.39756 | -2.38661 | -1.04381 |
| C | 1.34870  | -1.68926 | 1.77136  |
| C | 2.61099  | -1.86858 | 2.32486  |
| C | 3.65126  | -2.35503 | 1.54017  |
| C | 3.42402  | -2.66928 | 0.20456  |
| C | 2.16534  | -2.47438 | -0.34873 |
| H | 0.53147  | -1.35030 | 2.40190  |
| H | 2.77700  | -1.65040 | 3.37444  |
| H | 4.63155  | -2.51368 | 1.97687  |
| H | 4.22538  | -3.07852 | -0.40135 |
| H | 1.98517  | -2.72868 | -1.38985 |
| C | 2.17299  | 1.02941  | -1.01106 |
| C | -0.55959 | 0.62812  | 0.11911  |
| H | -0.08619 | 2.02991  | -1.46385 |
| H | -0.11366 | 0.42541  | 1.09904  |
| C | 3.52332  | 0.68892  | -0.78122 |
| C | 4.16578  | 0.98451  | 0.43739  |
| C | 5.49510  | 0.65458  | 0.59401  |
| C | 6.18586  | 0.03389  | -0.44953 |
| C | 5.55406  | -0.27267 | -1.65419 |
| C | 4.22150  | 0.04542  | -1.82140 |
| H | 3.70958  | -0.18968 | -2.74925 |
| H | 7.23320  | -0.21798 | -0.31843 |
| H | 6.10544  | -0.75789 | -2.45086 |
| H | 3.60919  | 1.46113  | 1.23576  |
| H | 6.00429  | 0.87358  | 1.52523  |
| H | 1.66594  | 0.71017  | -1.92190 |
| H | -2.49519 | 0.01345  | 0.82567  |

Man-6B/conf\_2.out

Charge=+1, Multiplicity=+1

|   |          |         |          |
|---|----------|---------|----------|
| C | 1.01893  | 2.99984 | 0.72015  |
| O | 0.31071  | 2.55902 | 1.86539  |
| C | -0.98889 | 2.40142 | 1.32470  |
| C | -1.00290 | 1.16550 | 0.33644  |
| O | -1.31982 | 1.54026 | -0.97471 |



|   |          |          |          |
|---|----------|----------|----------|
| C | 1.29111  | 1.78637  | -0.17236 |
| O | 0.65991  | -0.45701 | -0.56487 |
| O | 2.66991  | 1.33169  | -0.03133 |
| H | 1.94909  | 3.47303  | 1.03552  |
| C | 0.01388  | 3.98230  | 0.08082  |
| O | -1.23393 | 3.59224  | 0.64119  |
| H | -1.69558 | 2.29557  | 2.14624  |
| H | -0.01805 | 3.90693  | -1.00931 |
| H | 0.22019  | 5.01167  | 0.37871  |
| C | -2.70916 | 1.75397  | -1.22032 |
| C | -3.50029 | 0.47874  | -1.30226 |
| H | -2.73894 | 2.27852  | -2.17847 |
| H | -3.12841 | 2.42719  | -0.46610 |
| C | -3.16465 | -0.49389 | -2.24534 |
| C | -3.93251 | -1.64229 | -2.37566 |
| C | -5.04818 | -1.83172 | -1.56332 |
| C | -5.38319 | -0.87364 | -0.61540 |
| C | -4.60779 | 0.27434  | -0.48423 |
| H | -2.30044 | -0.33876 | -2.88433 |
| H | -3.67479 | -2.38555 | -3.12331 |
| H | -5.65816 | -2.72182 | -1.67718 |
| H | -6.25164 | -1.01524 | 0.01918  |
| H | -4.87879 | 1.02820  | 0.24979  |
| C | 0.75679  | -1.73148 | 0.10292  |
| C | -0.43334 | -2.04679 | 0.95578  |
| H | 0.87063  | -2.45134 | -0.70929 |
| H | 1.66958  | -1.74355 | 0.71393  |
| C | -0.35866 | -1.91962 | 2.34225  |
| C | -1.47901 | -2.14622 | 3.13359  |
| C | -2.68248 | -2.50585 | 2.53903  |
| C | -2.76152 | -2.64731 | 1.15684  |
| C | -1.64239 | -2.41997 | 0.36896  |
| H | 0.58470  | -1.64900 | 2.80975  |
| H | -1.41038 | -2.04805 | 4.21156  |
| H | -3.55826 | -2.68528 | 3.15341  |
| H | -3.69682 | -2.93013 | 0.68894  |
| H | -1.71398 | -2.51752 | -0.70905 |
| C | 3.07769  | 0.51318  | -0.92155 |

|   |          |          |          |
|---|----------|----------|----------|
| C | 0.42710  | 0.62514  | 0.29267  |
| H | 1.12106  | 1.99382  | -1.23146 |
| H | 0.72526  | 0.37618  | 1.31497  |
| C | 4.24770  | -0.25605 | -0.73107 |
| C | 4.96163  | -0.23164 | 0.48461  |
| C | 6.09079  | -1.01042 | 0.61776  |
| C | 6.51125  | -1.81512 | -0.44579 |
| C | 5.80851  | -1.84883 | -1.64901 |
| C | 4.67575  | -1.07217 | -1.79624 |
| H | 4.11358  | -1.08575 | -2.72480 |
| H | 7.40074  | -2.42580 | -0.33100 |
| H | 6.14899  | -2.47969 | -2.46145 |
| H | 4.61739  | 0.39791  | 1.29722  |
| H | 6.65277  | -1.00217 | 1.54434  |
| H | 2.51818  | 0.44708  | -1.85383 |
| H | -1.67914 | 0.38706  | 0.70681  |

Man-4B/conf\_1.out

Charge=+1, Multiplicity=+1

|   |            |             |             |
|---|------------|-------------|-------------|
| C | 1.21867500 | 1.44158600  | 0.93853000  |
| O | 0.18239400 | 1.11917200  | 1.87026600  |
| C | 0.76059000 | 0.13866200  | 2.71862800  |
| C | 0.81784100 | -1.19774900 | 1.95632700  |
| C | 2.11788200 | -0.97057000 | 1.11912600  |
| O | 1.95512300 | -1.38064000 | -0.20874900 |
| C | 3.17316800 | -1.74501400 | -0.86692800 |
| C | 4.09728400 | -0.57798000 | -1.06052000 |
| C | 3.79340200 | 0.40451900  | -2.00431200 |
| C | 4.59409700 | 1.53168400  | -2.13370100 |
| C | 5.71516600 | 1.68464800  | -1.32245600 |
| C | 6.03955200 | 0.70037800  | -0.39655000 |
| C | 5.23368900 | -0.42621100 | -0.26893400 |
| H | 5.49181000 | -1.19531300 | 0.45388700  |
| H | 6.92274300 | 0.80704800  | 0.22387900  |
| H | 6.34447500 | 2.56189400  | -1.42571800 |
| H | 4.35762200 | 2.28436500  | -2.87860200 |
| H | 2.93251100 | 0.27252400  | -2.65452900 |
| H | 2.85623100 | -2.16105300 | -1.82543000 |

|   |             |             |             |
|---|-------------|-------------|-------------|
| H | 3.66957800  | -2.53860000 | -0.29462200 |
| C | 2.36937500  | 0.52607200  | 1.41239500  |
| O | 2.10556300  | 0.51934800  | 2.81745100  |
| H | 3.36869000  | 0.89928100  | 1.20667800  |
| H | 2.94668600  | -1.51558600 | 1.58586400  |
| O | -0.34230500 | -1.33998700 | 1.18441300  |
| C | -0.64464300 | -2.67329200 | 0.76980900  |
| C | -1.84224400 | -2.57513700 | -0.12459300 |
| C | -3.11416100 | -2.91028300 | 0.33263800  |
| C | -4.22460300 | -2.75143100 | -0.49207300 |
| C | -4.07130400 | -2.24080300 | -1.77567300 |
| C | -2.80313300 | -1.90416000 | -2.24116300 |
| C | -1.69536600 | -2.07739200 | -1.42139500 |
| H | -0.69983000 | -1.84222600 | -1.78882700 |
| H | -2.67873200 | -1.52525400 | -3.25014400 |
| H | -4.93556700 | -2.11994200 | -2.41983100 |
| H | -5.20883000 | -3.03310400 | -0.13274100 |
| H | -3.23592900 | -3.30675100 | 1.33637800  |
| H | 0.21224700  | -3.09498500 | 0.23561500  |
| H | -0.85822800 | -3.29165500 | 1.65040600  |
| H | 0.92556000  | -2.03910700 | 2.64937900  |
| H | 0.26204700  | 0.14775200  | 3.68425800  |
| C | 0.70384300  | 1.22780900  | -0.47306800 |
| O | -0.60665200 | 1.85886800  | -0.57827800 |
| C | -1.59073700 | 1.18063400  | -0.13039300 |
| C | -2.90014400 | 1.70937900  | -0.11532300 |
| C | -3.92659100 | 0.83692900  | 0.29212200  |
| C | -5.23340800 | 1.28713500  | 0.31359200  |
| C | -5.51270200 | 2.59853300  | -0.06224800 |
| C | -4.49625200 | 3.47075400  | -0.46717000 |
| C | -3.18989300 | 3.03418900  | -0.49814700 |
| H | -2.38662900 | 3.69336300  | -0.80677400 |
| H | -4.73927900 | 4.48732900  | -0.75347100 |
| H | -6.53807500 | 2.95304700  | -0.04076100 |
| H | -6.03429000 | 0.62508400  | 0.62092000  |
| H | -3.68298800 | -0.18352200 | 0.57123200  |
| H | -1.39309900 | 0.16726400  | 0.22519900  |
| H | 1.32719000  | 1.73084000  | -1.20929600 |

|   |            |            |             |
|---|------------|------------|-------------|
| H | 0.59348500 | 0.17430900 | -0.71726600 |
| H | 1.49131400 | 2.49158500 | 1.08235200  |

Man-4B/conf\_2.out

Charge=+1, Multiplicity=+1

|   |          |          |          |
|---|----------|----------|----------|
| C | 2.21439  | -0.61184 | -0.73145 |
| C | 3.26096  | -1.52508 | -0.06944 |
| C | 2.73935  | -2.12550 | 1.24384  |
| O | 1.66198  | -2.93520 | 0.78352  |
| H | 3.53214  | -2.76343 | 1.65924  |
| C | 2.28163  | -1.26944 | 2.39928  |
| C | 1.81926  | -2.94141 | -0.64531 |
| C | 1.19770  | -1.66979 | -1.21854 |
| O | -0.12069 | -1.48937 | -0.79079 |
| H | 1.25357  | -1.71356 | -2.31394 |
| O | 2.71687  | 0.09570  | -1.83119 |
| H | 1.74806  | 0.07941  | -0.02383 |
| O | 3.17931  | -2.71861 | -0.86178 |
| H | 4.28358  | -1.15432 | -0.04366 |
| H | 1.48652  | -3.89407 | -1.04867 |
| O | 1.14803  | -0.42291 | 2.09366  |
| H | 3.06361  | -0.58025 | 2.71705  |
| H | 2.00255  | -1.90749 | 3.24139  |
| C | -0.02450 | -0.93705 | 2.04712  |
| C | -1.15225 | -0.12626 | 1.84537  |
| H | -0.12215 | -2.00862 | 2.21839  |
| C | -1.03572 | 1.25482  | 1.57236  |
| C | -2.18000 | 2.00492  | 1.43777  |
| C | -3.43499 | 1.40018  | 1.58297  |
| C | -3.55860 | 0.04052  | 1.85399  |
| C | -2.42048 | -0.73162 | 1.96559  |
| H | -0.05725 | 1.71168  | 1.46745  |
| H | -2.10957 | 3.06369  | 1.21835  |
| H | -4.33044 | 2.00391  | 1.47959  |
| H | -4.53805 | -0.41095 | 1.94731  |
| H | -2.49218 | -1.79730 | 2.15541  |
| C | -0.79839 | -0.48288 | -1.52408 |
| C | -2.28282 | -0.61828 | -1.36019 |

|   |          |          |          |
|---|----------|----------|----------|
| H | -0.53526 | -0.57838 | -2.58782 |
| H | -0.46759 | 0.51389  | -1.20111 |
| C | -2.87014 | -1.84141 | -1.04328 |
| C | -4.25382 | -1.95286 | -0.95335 |
| C | -5.06231 | -0.84623 | -1.18492 |
| C | -4.48006 | 0.37568  | -1.50678 |
| C | -3.09721 | 0.48836  | -1.58834 |
| H | -2.23695 | -2.70532 | -0.87468 |
| H | -4.70214 | -2.91178 | -0.71467 |
| H | -6.14171 | -0.93712 | -1.12765 |
| H | -5.10509 | 1.24131  | -1.70036 |
| H | -2.64656 | 1.44561  | -1.83655 |
| C | 3.34987  | 1.31537  | -1.47370 |
| C | 2.39337  | 2.31125  | -0.86834 |
| H | 3.76943  | 1.70013  | -2.40565 |
| H | 4.18739  | 1.13462  | -0.78537 |
| C | 2.61703  | 2.84911  | 0.39660  |
| C | 1.74197  | 3.78936  | 0.93507  |
| C | 0.62709  | 4.19235  | 0.21021  |
| C | 0.38719  | 3.64897  | -1.04991 |
| C | 1.26520  | 2.71611  | -1.58498 |
| H | 3.49770  | 2.54886  | 0.95840  |
| H | 1.93983  | 4.21643  | 1.91264  |
| H | -0.04242 | 4.94341  | 0.61704  |
| H | -0.47294 | 3.97390  | -1.62657 |
| H | 1.08962  | 2.30489  | -2.57458 |

Man-4B/conf\_3.out

Charge=+1, Multiplicity=+1

|   |         |          |          |
|---|---------|----------|----------|
| C | 2.42660 | -0.19855 | -0.62390 |
| C | 3.53982 | -1.06324 | -0.03541 |
| C | 3.06577 | -1.82691 | 1.20781  |
| O | 2.07942 | -2.69656 | 0.65498  |
| H | 3.91296 | -2.41958 | 1.57970  |
| C | 2.51865 | -1.12105 | 2.42496  |
| C | 2.25483 | -2.55441 | -0.76341 |
| C | 1.50522 | -1.28809 | -1.22040 |
| O | 0.19746 | -1.14163 | -0.74613 |

|   |          |          |          |
|---|----------|----------|----------|
| H | 1.53338  | -1.24652 | -2.31797 |
| O | 2.99474  | 0.66862  | -1.56473 |
| H | 1.87828  | 0.37220  | 0.13004  |
| O | 3.58598  | -2.18064 | -0.93503 |
| H | 4.51261  | -0.58282 | 0.03662  |
| H | 2.03218  | -3.49724 | -1.25764 |
| O | 1.30727  | -0.36871 | 2.17686  |
| H | 3.22851  | -0.38764 | 2.80652  |
| H | 2.30203  | -1.85136 | 3.20855  |
| C | 0.19404  | -0.99515 | 2.09160  |
| C | -1.01616 | -0.30463 | 1.92872  |
| H | 0.21014  | -2.07923 | 2.20401  |
| C | -1.06001 | 1.09298  | 1.73450  |
| C | -2.28440 | 1.71284  | 1.64444  |
| C | -3.45966 | 0.95930  | 1.73874  |
| C | -3.42517 | -0.42183 | 1.91446  |
| C | -2.20555 | -1.05986 | 1.99866  |
| H | -0.14186 | 1.66426  | 1.64858  |
| H | -2.33564 | 2.78373  | 1.49069  |
| H | -4.41922 | 1.46054  | 1.66663  |
| H | -4.34577 | -0.98924 | 1.96586  |
| H | -2.15385 | -2.13588 | 2.13009  |
| C | -0.72129 | -2.06078 | -1.31614 |
| C | -2.11393 | -1.50313 | -1.26402 |
| H | -0.67202 | -3.02624 | -0.79426 |
| H | -0.44188 | -2.24341 | -2.36476 |
| C | -2.33798 | -0.14221 | -1.45864 |
| C | -3.63437 | 0.35392  | -1.49967 |
| C | -4.71956 | -0.50361 | -1.34751 |
| C | -4.50091 | -1.86134 | -1.14315 |
| C | -3.20321 | -2.35716 | -1.09732 |
| H | -1.49060 | 0.52547  | -1.56568 |
| H | -3.80014 | 1.41445  | -1.66089 |
| H | -5.73187 | -0.11645 | -1.39418 |
| H | -5.34157 | -2.53677 | -1.02508 |
| H | -3.03727 | -3.42016 | -0.94426 |
| C | 2.06392  | 1.54536  | -2.16959 |
| C | 1.40367  | 2.50348  | -1.20897 |

|   |          |         |          |
|---|----------|---------|----------|
| H | 1.29237  | 0.98106 | -2.71237 |
| H | 2.64341  | 2.09791 | -2.91390 |
| C | 0.10816  | 2.95291 | -1.45428 |
| C | -0.48912 | 3.88741 | -0.61578 |
| C | 0.19617  | 4.36448 | 0.49589  |
| C | 1.48658  | 3.91111 | 0.75500  |
| C | 2.08929  | 2.99355 | -0.09775 |
| H | -0.43056 | 2.58733 | -2.32446 |
| H | -1.48810 | 4.24938 | -0.83729 |
| H | -0.26315 | 5.09978 | 1.14835  |
| H | 2.03332  | 4.29281 | 1.61106  |
| H | 3.10705  | 2.66259 | 0.08526  |

Man-4B/conf\_4.out

Charge=+1, Multiplicity=+1

|   |          |          |          |
|---|----------|----------|----------|
| C | 1.68783  | -0.63086 | -1.07242 |
| C | 3.20738  | -0.72510 | -0.98132 |
| C | 3.74553  | 0.03903  | 0.23901  |
| O | 3.23304  | -0.73388 | 1.32110  |
| H | 4.84221  | -0.02705 | 0.22564  |
| C | 3.44588  | 1.50266  | 0.46236  |
| C | 2.67016  | -1.88790 | 0.68177  |
| C | 1.27915  | -1.50341 | 0.13921  |
| O | 0.49004  | -0.77715 | 1.04346  |
| H | 0.75980  | -2.40006 | -0.21524 |
| O | 1.28610  | -1.13846 | -2.31243 |
| H | 1.30815  | 0.38547  | -0.94384 |
| O | 3.41227  | -2.05536 | -0.48551 |
| H | 3.74220  | -0.57337 | -1.91578 |
| H | 2.75337  | -2.74775 | 1.34216  |
| O | 2.03423  | 1.80566  | 0.61187  |
| H | 3.76598  | 2.10794  | -0.38511 |
| H | 3.95397  | 1.84852  | 1.36574  |
| C | 1.44403  | 1.54417  | 1.71256  |
| C | 0.09224  | 1.90789  | 1.90745  |
| H | 2.03073  | 1.10343  | 2.51841  |
| C | -0.43560 | 1.76788  | 3.20504  |
| C | -1.74672 | 2.12727  | 3.45200  |

|   |          |          |          |
|---|----------|----------|----------|
| C | -2.53064 | 2.61327  | 2.40670  |
| C | -2.01588 | 2.73818  | 1.11387  |
| C | -0.70754 | 2.38841  | 0.85272  |
| H | 0.19316  | 1.39096  | 4.00597  |
| H | -2.16185 | 2.03396  | 4.44855  |
| H | -3.56019 | 2.89626  | 2.60035  |
| H | -2.64221 | 3.10456  | 0.30972  |
| H | -0.30596 | 2.46753  | -0.15209 |
| C | -0.33133 | -1.58779 | 1.89026  |
| C | -1.50977 | -2.14407 | 1.14758  |
| H | -0.66256 | -0.91908 | 2.68851  |
| H | 0.26422  | -2.38908 | 2.34354  |
| C | -2.57312 | -1.30468 | 0.81378  |
| C | -3.65226 | -1.79151 | 0.08986  |
| C | -3.67497 | -3.12287 | -0.31707 |
| C | -2.62201 | -3.96648 | 0.01345  |
| C | -1.54593 | -3.47825 | 0.74761  |
| H | -2.54968 | -0.26407 | 1.12439  |
| H | -4.48378 | -1.13763 | -0.15286 |
| H | -4.51895 | -3.50377 | -0.88181 |
| H | -2.64062 | -5.00652 | -0.29316 |
| H | -0.73284 | -4.14567 | 1.02032  |
| C | -0.10883 | -1.03835 | -2.53964 |
| C | -0.61656 | 0.38115  | -2.60362 |
| H | -0.67179 | -1.59548 | -1.77772 |
| H | -0.27235 | -1.54005 | -3.49703 |
| C | -1.93182 | 0.66203  | -2.24064 |
| C | -2.43622 | 1.95291  | -2.35226 |
| C | -1.61902 | 2.98667  | -2.79650 |
| C | -0.30003 | 2.71564  | -3.14937 |
| C | 0.19347  | 1.41863  | -3.06503 |
| H | -2.56701 | -0.14078 | -1.87958 |
| H | -3.47319 | 2.15003  | -2.09810 |
| H | -2.01031 | 3.99463  | -2.88618 |
| H | 0.33786  | 3.51373  | -3.51484 |
| H | 1.21168  | 1.19969  | -3.37200 |

Man-4B/conf\_5.out



Charge=+1, Multiplicity=+1

|   |          |          |          |
|---|----------|----------|----------|
| C | -1.68143 | -0.60244 | 0.94250  |
| C | -3.19333 | -0.75461 | 0.73069  |
| C | -3.63499 | -0.17814 | -0.62551 |
| O | -3.01000 | -1.06945 | -1.54377 |
| H | -4.72684 | -0.27711 | -0.70093 |
| C | -3.34536 | 1.25156  | -1.01755 |
| C | -2.47361 | -2.10548 | -0.70789 |
| C | -1.15098 | -1.59662 | -0.10504 |
| O | -0.30662 | -0.95881 | -1.02654 |
| H | -0.63223 | -2.40569 | 0.41926  |
| O | -1.27549 | -1.00740 | 2.21956  |
| H | -1.31095 | 0.40343  | 0.73334  |
| O | -3.31523 | -2.14524 | 0.40316  |
| H | -3.82926 | -0.50377 | 1.57699  |
| H | -2.47184 | -3.04804 | -1.24941 |
| O | -1.93257 | 1.57993  | -1.07792 |
| H | -3.75667 | 1.95454  | -0.29376 |
| H | -3.77283 | 1.45676  | -2.00193 |
| C | -1.23445 | 1.19193  | -2.07376 |
| C | 0.11659  | 1.58856  | -2.20097 |
| H | -1.72994 | 0.61782  | -2.85629 |
| C | 0.79449  | 2.25377  | -1.16180 |
| C | 2.11152  | 2.61729  | -1.34933 |
| C | 2.75458  | 2.32605  | -2.55518 |
| C | 2.09024  | 1.66128  | -3.58431 |
| C | 0.77198  | 1.28530  | -3.40888 |
| H | 0.29341  | 2.46230  | -0.22252 |
| H | 2.64620  | 3.12475  | -0.55546 |
| H | 3.79029  | 2.61931  | -2.69179 |
| H | 2.60348  | 1.44101  | -4.51283 |
| H | 0.23635  | 0.76738  | -4.19864 |
| C | 0.65611  | -1.82197 | -1.63755 |
| C | 1.73692  | -2.22154 | -0.67638 |
| H | 1.07128  | -1.23873 | -2.46373 |
| H | 0.16320  | -2.70486 | -2.06205 |
| C | 2.58697  | -1.24795 | -0.15025 |
| C | 3.57641  | -1.59771 | 0.75652  |

|   |          |          |          |
|---|----------|----------|----------|
| C | 3.72485  | -2.92533 | 1.15008  |
| C | 2.88305  | -3.89958 | 0.63062  |
| C | 1.89200  | -3.54681 | -0.28010 |
| H | 2.46338  | -0.21169 | -0.45081 |
| H | 4.24245  | -0.83941 | 1.15551  |
| H | 4.49989  | -3.19843 | 1.85789  |
| H | 2.99592  | -4.93476 | 0.93336  |
| H | 1.23747  | -4.31191 | -0.68867 |
| C | -1.25997 | 0.05370  | 3.16000  |
| C | -0.23775 | 1.11045  | 2.82503  |
| H | -1.02526 | -0.41910 | 4.11646  |
| H | -2.25568 | 0.51047  | 3.25589  |
| C | -0.57066 | 2.46276  | 2.84241  |
| C | 0.39155  | 3.43426  | 2.57898  |
| C | 1.69673  | 3.05475  | 2.28932  |
| C | 2.03068  | 1.70323  | 2.24809  |
| C | 1.07025  | 0.73644  | 2.51161  |
| H | -1.58685 | 2.76267  | 3.08455  |
| H | 0.12430  | 4.48513  | 2.61453  |
| H | 2.45448  | 3.81139  | 2.11165  |
| H | 3.04984  | 1.40189  | 2.02809  |
| H | 1.33154  | -0.31640 | 2.47726  |

Man-4B/conf\_6.out

Charge=+1, Multiplicity=+1

|   |          |          |          |
|---|----------|----------|----------|
| C | 0.66619  | 0.31291  | 2.19732  |
| C | 0.78450  | -0.92586 | 3.08012  |
| C | -0.39650 | -1.89035 | 2.87609  |
| O | -0.17041 | -2.37091 | 1.55536  |
| H | -0.28707 | -2.71525 | 3.59327  |
| C | -1.83131 | -1.43203 | 3.01845  |
| C | 1.09924  | -1.80542 | 1.19759  |
| C | 0.87969  | -0.33097 | 0.80016  |
| O | -0.21989 | -0.10585 | -0.04394 |
| H | 1.79917  | 0.06253  | 0.36163  |
| O | 1.66473  | 1.21471  | 2.58055  |
| H | -0.31742 | 0.79458  | 2.24841  |
| O | 1.78897  | -1.69147 | 2.40462  |

|   |          |          |          |
|---|----------|----------|----------|
| H | 1.06929  | -0.73521 | 4.11207  |
| H | 1.60600  | -2.45448 | 0.48938  |
| O | -2.25947 | -0.47559 | 2.01044  |
| H | -1.99874 | -0.92248 | 3.96681  |
| H | -2.50244 | -2.29115 | 2.95011  |
| C | -2.45440 | -0.87945 | 0.81415  |
| C | -3.02403 | -0.01952 | -0.15707 |
| H | -2.26380 | -1.92794 | 0.58965  |
| C | -3.20174 | 1.35528  | 0.07982  |
| C | -3.75151 | 2.14409  | -0.90836 |
| C | -4.13183 | 1.57302  | -2.12641 |
| C | -3.96340 | 0.21158  | -2.36616 |
| C | -3.40260 | -0.58693 | -1.38601 |
| H | -2.89883 | 1.77987  | 1.02957  |
| H | -3.89254 | 3.20588  | -0.74254 |
| H | -4.56709 | 2.20100  | -2.89671 |
| H | -4.26649 | -0.21772 | -3.31377 |
| H | -3.26158 | -1.64957 | -1.55666 |
| C | 0.11672  | -0.02096 | -1.43571 |
| C | 0.82090  | -1.24390 | -1.94240 |
| H | 0.72924  | 0.87295  | -1.58823 |
| H | -0.83808 | 0.13252  | -1.94458 |
| C | 2.18545  | -1.20182 | -2.22030 |
| C | 2.86165  | -2.35092 | -2.61673 |
| C | 2.17523  | -3.55284 | -2.73904 |
| C | 0.80928  | -3.60270 | -2.47442 |
| C | 0.13905  | -2.45320 | -2.08055 |
| H | 2.71980  | -0.26081 | -2.12273 |
| H | 3.92425  | -2.30789 | -2.82978 |
| H | 2.70093  | -4.45011 | -3.04683 |
| H | 0.27049  | -4.53824 | -2.57956 |
| H | -0.92623 | -2.49593 | -1.87240 |
| C | 1.45268  | 2.54973  | 2.15081  |
| C | 1.65949  | 2.77582  | 0.67504  |
| H | 2.16945  | 3.14214  | 2.72459  |
| H | 0.44237  | 2.87600  | 2.43763  |
| C | 2.88423  | 2.46207  | 0.08166  |
| C | 3.09304  | 2.69912  | -1.27022 |

|   |          |         |          |
|---|----------|---------|----------|
| C | 2.08238  | 3.26312 | -2.04607 |
| C | 0.86216  | 3.58018 | -1.46298 |
| C | 0.65280  | 3.33040 | -0.10929 |
| H | 3.67649  | 2.03479 | 0.68956  |
| H | 4.05284  | 2.46327 | -1.71822 |
| H | 2.25154  | 3.46160 | -3.09897 |
| H | 0.07423  | 4.02685 | -2.06049 |
| H | -0.30133 | 3.58289 | 0.34560  |

Man-4B/conf\_7.out

Charge=+1, Multiplicity=+1

|   |          |          |          |
|---|----------|----------|----------|
| C | -1.65130 | -1.28785 | -0.79293 |
| C | -2.28417 | -2.44961 | -0.01568 |
| C | -1.24013 | -3.24975 | 0.77773  |
| O | -0.81980 | -2.30386 | 1.75663  |
| H | -1.76356 | -4.08071 | 1.27082  |
| C | -0.03910 | -3.88687 | 0.11750  |
| C | -1.72483 | -1.20539 | 1.58504  |
| C | -1.26928 | -0.35496 | 0.39913  |
| O | 0.09376  | -0.03352 | 0.48430  |
| H | -1.87079 | 0.55732  | 0.37526  |
| O | -2.44844 | -0.74893 | -1.81078 |
| H | -0.74349 | -1.59714 | -1.31324 |
| O | -2.90122 | -1.78433 | 1.10070  |
| H | -3.01011 | -3.05141 | -0.55922 |
| H | -1.87750 | -0.70215 | 2.53624  |
| O | 0.91631  | -2.95327 | -0.44915 |
| H | -0.33581 | -4.51679 | -0.72063 |
| H | 0.49916  | -4.49616 | 0.84706  |
| C | 1.66473  | -2.27154 | 0.33747  |
| C | 2.73036  | -1.50418 | -0.16505 |
| H | 1.49013  | -2.35476 | 1.40893  |
| C | 2.98951  | -1.39394 | -1.54811 |
| C | 4.07912  | -0.66795 | -1.96961 |
| C | 4.91772  | -0.05801 | -1.02792 |
| C | 4.67509  | -0.16768 | 0.33756  |
| C | 3.57384  | -0.87677 | 0.77381  |
| H | 2.33627  | -1.88587 | -2.25969 |

|   |          |          |          |
|---|----------|----------|----------|
| H | 4.29428  | -0.57015 | -3.02729 |
| H | 5.77588  | 0.50993  | -1.37152 |
| H | 5.32927  | 0.31917  | 1.04955  |
| H | 3.35466  | -0.96002 | 1.83282  |
| C | 0.46325  | 1.00703  | -0.41019 |
| C | 1.68708  | 1.71985  | 0.08384  |
| H | -0.37045 | 1.71888  | -0.48988 |
| H | 0.63415  | 0.60197  | -1.41750 |
| C | 1.95314  | 1.83105  | 1.44796  |
| C | 3.05452  | 2.55412  | 1.89191  |
| C | 3.89691  | 3.17773  | 0.97813  |
| C | 3.63270  | 3.07334  | -0.38337 |
| C | 2.53562  | 2.34357  | -0.82694 |
| H | 1.28828  | 1.35197  | 2.15831  |
| H | 3.24805  | 2.64187  | 2.95602  |
| H | 4.74885  | 3.75249  | 1.32533  |
| H | 4.27961  | 3.56586  | -1.10194 |
| H | 2.33510  | 2.26396  | -1.89186 |
| C | -3.78157 | -0.33329 | -1.50651 |
| C | -3.85045 | 1.01219  | -0.83663 |
| H | -4.30211 | -1.08177 | -0.90067 |
| H | -4.27115 | -0.29613 | -2.48264 |
| C | -4.49629 | 1.16999  | 0.38661  |
| C | -4.52098 | 2.41116  | 1.01582  |
| C | -3.89393 | 3.50192  | 0.42663  |
| C | -3.25567 | 3.35362  | -0.80250 |
| C | -3.23922 | 2.11687  | -1.43259 |
| H | -4.96953 | 0.31257  | 0.85578  |
| H | -5.02891 | 2.52485  | 1.96768  |
| H | -3.91072 | 4.46938  | 0.91680  |
| H | -2.78137 | 4.20836  | -1.27349 |
| H | -2.74298 | 1.99789  | -2.39129 |

Man-4B/conf\_8.out

Charge=+1, Multiplicity=+1

|   |          |          |          |
|---|----------|----------|----------|
| C | 0.14889  | -1.83272 | 0.91827  |
| C | 0.15825  | -3.15691 | 0.14602  |
| C | -1.08082 | -3.32409 | -0.74997 |

|   |          |          |          |
|---|----------|----------|----------|
| O | -0.87440 | -2.32158 | -1.74228 |
| H | -1.01871 | -4.31697 | -1.21651 |
| C | -2.49000 | -3.24363 | -0.20773 |
| C | 0.43321  | -1.81274 | -1.44846 |
| C | 0.33587  | -0.84085 | -0.26991 |
| O | -0.74026 | 0.05912  | -0.42552 |
| H | 1.27513  | -0.29138 | -0.17675 |
| O | 1.06929  | -1.75011 | 1.96973  |
| H | -0.81473 | -1.64722 | 1.39747  |
| O | 1.11455  | -2.89928 | -0.89507 |
| H | 0.43276  | -4.04295 | 0.71537  |
| H | 0.90514  | -1.45644 | -2.36025 |
| O | -2.89323 | -1.94009 | 0.29383  |
| H | -2.62714 | -3.91372 | 0.64033  |
| H | -3.19973 | -3.51410 | -0.99259 |
| C | -3.03776 | -0.96944 | -0.52814 |
| C | -3.64029 | 0.24104  | -0.11088 |
| H | -2.76966 | -1.13344 | -1.56980 |
| C | -4.05737 | 0.44816  | 1.21757  |
| C | -4.62681 | 1.65575  | 1.56398  |
| C | -4.78122 | 2.65552  | 0.59925  |
| C | -4.37130 | 2.45660  | -0.71775 |
| C | -3.80062 | 1.25035  | -1.07777 |
| H | -3.92951 | -0.33898 | 1.95172  |
| H | -4.95587 | 1.83092  | 2.58162  |
| H | -5.22901 | 3.60268  | 0.88136  |
| H | -4.49742 | 3.24264  | -1.45276 |
| H | -3.46274 | 1.07939  | -2.09479 |
| C | -0.62308 | 1.18497  | 0.43631  |
| C | 0.42240  | 2.17664  | -0.00132 |
| H | -0.42279 | 0.85186  | 1.46314  |
| H | -1.60628 | 1.66383  | 0.43061  |
| C | 0.92108  | 3.08584  | 0.92942  |
| C | 1.83351  | 4.05815  | 0.54285  |
| C | 2.27428  | 4.11501  | -0.77508 |
| C | 1.79069  | 3.20116  | -1.70282 |
| C | 0.85999  | 2.24178  | -1.32039 |
| H | 0.59464  | 3.03318  | 1.96473  |

|   |         |          |          |
|---|---------|----------|----------|
| H | 2.21005 | 4.76607  | 1.27371  |
| H | 2.99458 | 4.86791  | -1.07622 |
| H | 2.13483 | 3.23753  | -2.73093 |
| H | 0.47359 | 1.53741  | -2.04967 |
| C | 2.43667 | -2.10372 | 1.73641  |
| C | 3.21866 | -1.06600 | 0.97803  |
| H | 2.51140 | -3.07200 | 1.23135  |
| H | 2.84221 | -2.22335 | 2.74363  |
| C | 3.30681 | 0.23772  | 1.46851  |
| C | 3.99851 | 1.20970  | 0.76034  |
| C | 4.61756 | 0.88776  | -0.44337 |
| C | 4.55061 | -0.41200 | -0.92944 |
| C | 3.85160 | -1.38433 | -0.22123 |
| H | 2.81867 | 0.49019  | 2.40528  |
| H | 4.05445 | 2.22159  | 1.14445  |
| H | 5.15655 | 1.64943  | -0.99645 |
| H | 5.04212 | -0.67096 | -1.86142 |
| H | 3.78388 | -2.39599 | -0.60845 |
