# Supplementary material for: Mechanistic insight into benzylidene-directed glycosylation reactions using cryogenic infrared spectroscopy
Source: PubMed Central journal article supplement (PMC11549046; doi:10.1038/s44160-024-00619-0), 2024-07-26
Supplement: 44160_2024_619_MOESM3_ESM.pdf [file 44160_2024_619_MOESM3_ESM.pdf]

## Glc-4B\_Dioxane

Charge=+1, Multiplicity=+1

|   |             |             |             |
|---|-------------|-------------|-------------|
| C | 1.97345200  | 0.86231200  | 1.91971000  |
| O | 0.69150100  | 0.81726700  | 2.54907000  |
| C | 2.15907800  | -0.59591800 | 1.48389500  |
| C | 1.13244500  | -1.11116600 | 0.44770300  |
| C | -0.17723400 | -1.00512900 | 1.24725300  |
| C | 0.38125900  | -0.58940900 | 2.61285800  |
| H | 2.74460000  | 1.06800100  | 2.67332300  |
| C | 2.02857800  | 2.03405700  | 0.95864100  |
| O | 1.63358600  | -1.21567700 | 2.66556800  |
| H | 3.19202900  | -0.89024200 | 1.32033100  |
| H | -0.21370200 | -0.80248200 | 3.49713500  |
| O | -0.80788900 | -2.25733900 | 1.28420700  |
| H | -0.83840500 | -0.24264800 | 0.82393400  |
| H | 1.33809100  | -2.18042100 | 0.31425600  |
| O | 1.03945200  | -0.47050600 | -0.79137300 |
| O | 0.83987000  | 2.09645300  | 0.14624300  |
| H | 2.86317700  | 1.94592500  | 0.26540900  |
| H | 2.10111600  | 2.97112100  | 1.51601000  |
| C | -0.23896300 | 2.48561300  | 0.70275000  |
| C | -1.47602600 | 2.34192400  | 0.04473100  |
| H | -0.18091000 | 2.95844300  | 1.68295500  |
| C | -2.62107500 | 2.88520600  | 0.66046700  |
| C | -1.57307300 | 1.65454000  | -1.18427700 |
| C | -2.80391900 | 1.53655500  | -1.78798800 |
| C | -3.93488000 | 2.08487400  | -1.17632500 |
| C | -3.84833000 | 2.75606900  | 0.04304400  |
| H | -2.52917600 | 3.40317700  | 1.60949800  |
| H | -4.90068000 | 1.98097600  | -1.65838600 |
| H | -4.73856300 | 3.16904700  | 0.50186400  |
| H | -0.68352800 | 1.20672300  | -1.61202700 |
| H | -2.90289500 | 1.00183800  | -2.72372900 |
| C | -2.19614200 | -2.19002500 | 1.54495100  |
| C | -3.01827300 | -1.82557100 | 0.33292700  |
| H | -2.41029600 | -1.49796800 | 2.37113400  |
| H | -2.47546400 | -3.19125600 | 1.88582300  |
| C | -4.27855200 | -1.25240800 | 0.49298700  |

|   |             |             |             |
|---|-------------|-------------|-------------|
| C | -5.09899700 | -1.03029200 | -0.60718200 |
| C | -4.65925100 | -1.36450000 | -1.88392700 |
| C | -3.39077300 | -1.90906200 | -2.05285300 |
| C | -2.57478500 | -2.13904300 | -0.95099500 |
| H | -4.63162500 | -0.99601500 | 1.48818400  |
| H | -6.08569400 | -0.60118400 | -0.46552400 |
| H | -5.30256400 | -1.20184700 | -2.74252100 |
| H | -3.03940500 | -2.16981300 | -3.04609300 |
| H | -1.59245000 | -2.58075300 | -1.07861300 |
| C | 1.90338900  | -0.99246500 | -1.79907100 |
| C | 3.34120000  | -0.60746500 | -1.59322300 |
| H | 1.52579800  | -0.57596100 | -2.73538900 |
| H | 1.79777600  | -2.08407800 | -1.84074700 |
| C | 4.26790000  | -1.52189400 | -1.09676800 |
| C | 5.58161400  | -1.13548100 | -0.85023000 |
| C | 5.98080900  | 0.17138300  | -1.10448900 |
| C | 5.06730200  | 1.08770400  | -1.61921200 |
| C | 3.75648600  | 0.69783600  | -1.86336300 |
| H | 3.96126300  | -2.54595500 | -0.90249500 |
| H | 6.29439500  | -1.85692700 | -0.46531600 |
| H | 7.00600600  | 0.47264000  | -0.91816200 |
| H | 5.38346300  | 2.10131500  | -1.84273900 |
| H | 3.04604900  | 1.40728200  | -2.27992400 |

Glc-4B\_Toluene

Charge=+1, Multiplicity=+1

|   |             |             |             |
|---|-------------|-------------|-------------|
| C | -0.29018000 | -3.12956500 | 0.86062300  |
| O | -1.66650600 | -3.08991200 | 1.23731300  |
| C | -0.37063800 | -2.97018200 | -0.67038800 |
| C | -0.81836800 | -1.57122100 | -1.10406700 |
| C | -2.22360500 | -1.50618300 | -0.47209500 |
| C | -2.36378500 | -2.96474000 | -0.00113300 |
| H | 0.12370800  | -4.11535000 | 1.09587900  |
| C | 0.41123300  | -2.06323900 | 1.67482900  |
| O | -1.57515500 | -3.69615900 | -0.91001000 |
| H | 0.45987000  | -3.39788400 | -1.22651100 |
| H | -3.36584800 | -3.37706400 | 0.08541600  |
| O | -3.17275000 | -1.11513600 | -1.42610400 |

|   |             |             |             |
|---|-------------|-------------|-------------|
| H | -2.22553200 | -0.82718600 | 0.38827000  |
| H | -0.93912500 | -1.58718900 | -2.19429500 |
| O | 0.06763200  | -0.54713000 | -0.72531100 |
| O | 1.77721000  | -1.93844300 | 1.19493500  |
| H | 0.48344300  | -2.36555900 | 2.71993000  |
| H | -0.08672200 | -1.09914000 | 1.58543300  |
| C | 2.24368900  | -0.77692400 | 0.97541100  |
| C | 3.55138800  | -0.58436700 | 0.48643700  |
| H | 1.61537500  | 0.08743800  | 1.19041900  |
| C | 3.99004500  | 0.74740200  | 0.35855700  |
| C | 4.39597600  | -1.65966100 | 0.14153500  |
| C | 5.66262200  | -1.39134300 | -0.32742100 |
| C | 6.09281700  | -0.06520200 | -0.45342500 |
| C | 5.26411700  | 1.00081600  | -0.11208700 |
| H | 3.32573800  | 1.56214900  | 0.62818300  |
| H | 7.09226000  | 0.13442800  | -0.82521500 |
| H | 5.61339900  | 2.02107400  | -0.21692800 |
| H | 4.04291400  | -2.67887200 | 0.24674700  |
| H | 6.32753900  | -2.20251300 | -0.59925000 |
| C | -4.35227000 | -0.54880800 | -0.85192700 |
| C | -4.06528800 | 0.76066600  | -0.16817200 |
| H | -4.81343600 | -1.25374100 | -0.14839800 |
| H | -5.03605800 | -0.41328300 | -1.69162700 |
| C | -4.09402500 | 0.86942900  | 1.22066900  |
| C | -3.75855000 | 2.06772300  | 1.84572800  |
| C | -3.38589200 | 3.16738800  | 1.08278500  |
| C | -3.36034600 | 3.07062700  | -0.30627000 |
| C | -3.70114600 | 1.87598300  | -0.92593500 |
| H | -4.38512300 | 0.00937600  | 1.81795300  |
| H | -3.79184200 | 2.14074000  | 2.92778300  |
| H | -3.12323100 | 4.10244100  | 1.56622700  |
| H | -3.07913000 | 3.93035000  | -0.90517200 |
| H | -3.68470100 | 1.80185900  | -2.00964700 |
| C | -0.23253600 | 0.67722600  | -1.40376800 |
| C | 0.53562900  | 1.79761700  | -0.77836700 |
| H | -1.30714700 | 0.87515800  | -1.32713900 |
| H | 0.02149500  | 0.57163100  | -2.46517900 |
| C | 1.53946600  | 2.45807800  | -1.48179900 |

|   |             |            |             |
|---|-------------|------------|-------------|
| C | 2.22839700  | 3.51944600 | -0.90118000 |
| C | 1.93079800  | 3.91356500 | 0.39816800  |
| C | 0.93148400  | 3.25390000 | 1.11145600  |
| C | 0.22961400  | 2.21039900 | 0.52130500  |
| H | 1.77824200  | 2.14468700 | -2.49360600 |
| H | 2.99931600  | 4.03548700 | -1.46370500 |
| H | 2.46630400  | 4.74026000 | 0.85248200  |
| H | 0.68384100  | 3.57226500 | 2.11854400  |
| H | -0.58286200 | 1.72968400 | 1.06002200  |

Glc-4B\_Et2O

Charge=+1, Multiplicity=+1

|   |             |             |             |
|---|-------------|-------------|-------------|
| C | 3.21491500  | 1.19816300  | 1.19180600  |
| O | 2.94148000  | -0.17110200 | 1.49570100  |
| C | 3.52502000  | 1.12999800  | -0.31005300 |
| C | 2.32176600  | 0.73064400  | -1.16563300 |
| C | 2.07293200  | -0.71681600 | -0.67669400 |
| C | 3.26166900  | -0.87112600 | 0.28159000  |
| H | 4.14075500  | 1.50314200  | 1.69402800  |
| C | 2.12821500  | 2.09801200  | 1.76800200  |
| O | 4.26838700  | -0.09269200 | -0.31007300 |
| H | 4.12566300  | 1.95296700  | -0.68867800 |
| H | 3.61315800  | -1.87365900 | 0.51143700  |
| O | 2.13604800  | -1.59709800 | -1.76708500 |
| H | 1.11636700  | -0.80421400 | -0.14801900 |
| H | 2.64532000  | 0.67629100  | -2.21367400 |
| O | 1.25886100  | 1.61951000  | -1.01003100 |
| O | 0.80721100  | 1.52124500  | 1.66567700  |
| H | 2.06971900  | 3.04669800  | 1.23966500  |
| H | 2.31889700  | 2.27798700  | 2.82757100  |
| C | 0.51183800  | 0.55613900  | 2.43963300  |
| C | -0.74674000 | -0.07592100 | 2.35858500  |
| H | 1.23497200  | 0.24750700  | 3.19302100  |
| C | -1.02236800 | -1.10620600 | 3.27917300  |
| C | -1.71702200 | 0.33304900  | 1.42115000  |
| C | -2.94729200 | -0.28523700 | 1.41712100  |
| C | -3.21890300 | -1.29983800 | 2.33896300  |
| C | -2.26244800 | -1.71361600 | 3.26515400  |

|   |             |             |             |
|---|-------------|-------------|-------------|
| H | -0.26396200 | -1.40956400 | 3.99405300  |
| H | -4.19268300 | -1.77832900 | 2.33130000  |
| H | -2.49158000 | -2.50431000 | 3.96933300  |
| H | -1.49053700 | 1.12839600  | 0.72082300  |
| H | -3.70035800 | 0.01683300  | 0.69907800  |
| C | 1.59237300  | -2.88254700 | -1.49417600 |
| C | 0.09524400  | -2.85880400 | -1.33259000 |
| H | 2.05882000  | -3.32386300 | -0.60444400 |
| H | 1.87446600  | -3.49571900 | -2.35308600 |
| C | -0.51269900 | -3.37155200 | -0.18937100 |
| C | -1.89905100 | -3.38067800 | -0.06952800 |
| C | -2.68865900 | -2.85852100 | -1.08588600 |
| C | -2.08836000 | -2.33182800 | -2.22665800 |
| C | -0.70544500 | -2.33700800 | -2.35066300 |
| H | 0.10300400  | -3.77817300 | 0.60837300  |
| H | -2.36035500 | -3.79477300 | 0.82041900  |
| H | -3.76982900 | -2.86454100 | -0.99402900 |
| H | -2.70164500 | -1.93210900 | -3.02791400 |
| H | -0.23623700 | -1.94145300 | -3.24659500 |
| C | 0.19798800  | 1.35513000  | -1.91198400 |
| C | -1.01185600 | 2.15058500  | -1.52449300 |
| H | -0.05384400 | 0.28781300  | -1.89947200 |
| H | 0.52189300  | 1.60300100  | -2.93417700 |
| C | -0.89919100 | 3.36335500  | -0.84779400 |
| C | -2.03959900 | 4.06802700  | -0.47728900 |
| C | -3.30211100 | 3.57317600  | -0.78790800 |
| C | -3.41952600 | 2.36829100  | -1.47367100 |
| C | -2.27999800 | 1.65917500  | -1.83467700 |
| H | 0.08457000  | 3.74475800  | -0.59892800 |
| H | -1.94211800 | 5.00811500  | 0.05582800  |
| H | -4.19028100 | 4.12373300  | -0.49672200 |
| H | -4.40057200 | 1.97476900  | -1.71913500 |
| H | -2.37365700 | 0.70553100  | -2.34622600 |

Glc-4B\_CHCl<sub>3</sub>

Charge=+1, Multiplicity=+1

|   |             |             |            |
|---|-------------|-------------|------------|
| C | -2.56803300 | -2.44411700 | 1.28247800 |
| O | -3.18985000 | -1.17824400 | 1.50219300 |

|   |             |             |             |
|---|-------------|-------------|-------------|
| C | -2.59773200 | -2.55242100 | -0.24866900 |
| C | -1.72263200 | -1.52862600 | -0.97316800 |
| C | -2.38236300 | -0.20282500 | -0.53605500 |
| C | -3.60871700 | -0.76435000 | 0.20373700  |
| H | -3.21460600 | -3.24134600 | 1.67086500  |
| C | -1.27702300 | -2.55769500 | 2.06581600  |
| O | -3.88360600 | -1.96859100 | -0.47560300 |
| H | -2.55343500 | -3.56745000 | -0.63607200 |
| H | -4.49263800 | -0.13507400 | 0.27265900  |
| O | -2.71511600 | 0.54276000  | -1.67849700 |
| H | -1.73876000 | 0.36929600  | 0.14218800  |
| H | -1.91798300 | -1.64407900 | -2.04679800 |
| O | -0.34955500 | -1.67216500 | -0.72648000 |
| O | -0.54205700 | -1.31245900 | 2.06415400  |
| H | -0.64498800 | -3.36405800 | 1.68639600  |
| H | -1.50267100 | -2.73159200 | 3.11798100  |
| C | 0.67267500  | -1.28960700 | 1.69553000  |
| C | 1.43257000  | -0.10305600 | 1.77583800  |
| H | 1.14147200  | -2.21572800 | 1.36533300  |
| C | 2.80622000  | -0.19400600 | 1.48120300  |
| C | 0.86126600  | 1.12063600  | 2.18204100  |
| C | 1.66882600  | 2.22928900  | 2.29988900  |
| C | 3.03503100  | 2.13058200  | 2.01612600  |
| C | 3.60377100  | 0.92707500  | 1.60861800  |
| H | 3.22835200  | -1.13940200 | 1.15576200  |
| H | 3.66202800  | 3.01064000  | 2.11367300  |
| H | 4.66208600  | 0.86973600  | 1.38526000  |
| H | -0.19896700 | 1.17701500  | 2.39921200  |
| H | 1.24880100  | 3.17725000  | 2.61117200  |
| C | -3.00320500 | 1.90785200  | -1.40619700 |
| C | -1.78094200 | 2.69123400  | -1.00496700 |
| H | -3.77702200 | 1.99845200  | -0.63350700 |
| H | -3.41941300 | 2.29963400  | -2.33736800 |
| C | -1.77188500 | 3.46063400  | 0.15562500  |
| C | -0.65104800 | 4.21143800  | 0.49803700  |
| C | 0.47973700  | 4.18001200  | -0.30840700 |
| C | 0.48379400  | 3.40349900  | -1.46424600 |
| C | -0.64278300 | 2.67049200  | -1.81353000 |

|   |             |             |             |
|---|-------------|-------------|-------------|
| H | -2.65238700 | 3.48077400  | 0.79180200  |
| H | -0.66269400 | 4.81756800  | 1.39817000  |
| H | 1.35667600  | 4.75994300  | -0.04023000 |
| H | 1.36193600  | 3.38277000  | -2.10167600 |
| H | -0.64850600 | 2.07928400  | -2.72439400 |
| C | 0.42932400  | -0.91109800 | -1.64289300 |
| C | 1.87691200  | -1.27540700 | -1.51982100 |
| H | 0.29152100  | 0.15964000  | -1.45336000 |
| H | 0.07090700  | -1.11400700 | -2.66224000 |
| C | 2.84983900  | -0.30687300 | -1.75870000 |
| C | 4.19938800  | -0.62567200 | -1.66843300 |
| C | 4.58982800  | -1.91498200 | -1.32023800 |
| C | 3.62273100  | -2.88660300 | -1.08109800 |
| C | 2.27193700  | -2.57113100 | -1.19014800 |
| H | 2.54776200  | 0.70780100  | -2.00189900 |
| H | 4.94750700  | 0.13745300  | -1.85531100 |
| H | 5.64272100  | -2.16257500 | -1.23885100 |
| H | 3.92098500  | -3.89602600 | -0.81801500 |
| H | 1.51786700  | -3.33196800 | -1.01710700 |

Glc-4B\_DCM

Charge=+1, Multiplicity=+1

|   |             |             |             |
|---|-------------|-------------|-------------|
| C | -2.47815100 | -2.56059200 | 1.24496600  |
| O | -3.17228100 | -1.32966600 | 1.45616600  |
| C | -2.45992200 | -2.65692100 | -0.28754900 |
| C | -1.61818400 | -1.58532200 | -0.98278100 |
| C | -2.35194100 | -0.29709800 | -0.55043400 |
| C | -3.56992700 | -0.92368800 | 0.15022000  |
| H | -3.09286000 | -3.39328900 | 1.60941300  |
| C | -1.20774000 | -2.61138900 | 2.06627800  |
| O | -3.76699000 | -2.13397900 | -0.54711200 |
| H | -2.35449500 | -3.66533300 | -0.67984200 |
| H | -4.48414700 | -0.33702600 | 0.19641500  |
| O | -2.69361100 | 0.44485400  | -1.69354600 |
| H | -1.75485400 | 0.29847700  | 0.14914000  |
| H | -1.78264200 | -1.70064900 | -2.06163100 |
| O | -0.24684400 | -1.67009600 | -0.70556900 |
| O | -0.52914200 | -1.33498500 | 2.07068000  |

|   |             |             |             |
|---|-------------|-------------|-------------|
| H | -0.53047900 | -3.39188600 | 1.71372600  |
| H | -1.45665700 | -2.78611800 | 3.11281700  |
| C | 0.68933800  | -1.26052500 | 1.72198300  |
| C | 1.38548600  | -0.03410900 | 1.78649300  |
| H | 1.20997000  | -2.16947700 | 1.42232300  |
| C | 2.76426900  | -0.05666600 | 1.50433000  |
| C | 0.74455700  | 1.16542600  | 2.15914100  |
| C | 1.48893000  | 2.31941300  | 2.25566400  |
| C | 2.86045100  | 2.28969900  | 1.98166500  |
| C | 3.49786200  | 1.10996000  | 1.60765300  |
| H | 3.23946300  | -0.98560500 | 1.20634400  |
| H | 3.43704300  | 3.20532200  | 2.06024600  |
| H | 4.55934500  | 1.10578100  | 1.39191000  |
| H | -0.31839200 | 1.16798100  | 2.37052500  |
| H | 1.01489200  | 3.24938200  | 2.54201200  |
| C | -3.05110600 | 1.79167100  | -1.41358000 |
| C | -1.87194000 | 2.63741400  | -1.00880700 |
| H | -3.82901800 | 1.83891300  | -0.64127500 |
| H | -3.48662000 | 2.16767200  | -2.34269300 |
| C | -1.92729200 | 3.44774800  | 0.12255000  |
| C | -0.85260600 | 4.26519200  | 0.46043400  |
| C | 0.29702400  | 4.26077700  | -0.31996700 |
| C | 0.36646500  | 3.44184700  | -1.44400700 |
| C | -0.71485000 | 2.64204300  | -1.79009600 |
| H | -2.82157000 | 3.44610100  | 0.73943000  |
| H | -0.91277400 | 4.89932000  | 1.33911100  |
| H | 1.13914300  | 4.89100600  | -0.05363200 |
| H | 1.26160700  | 3.43652800  | -2.05772400 |
| H | -0.66938200 | 2.01637800  | -2.67630600 |
| C | 0.52719500  | -0.86154900 | -1.58275800 |
| C | 1.97743400  | -1.22138500 | -1.47102100 |
| H | 0.38296800  | 0.19824800  | -1.34216100 |
| H | 0.17406400  | -1.01706000 | -2.61202800 |
| C | 2.94453800  | -0.25148100 | -1.72971900 |
| C | 4.29563400  | -0.56135400 | -1.63702000 |
| C | 4.69407600  | -1.84310100 | -1.26873400 |
| C | 3.73300500  | -2.81580500 | -1.01270000 |
| C | 2.37990500  | -2.50923600 | -1.12257200 |



|   |            |             |             |
|---|------------|-------------|-------------|
| H | 2.63693700 | 0.75795400  | -1.98743400 |
| H | 5.03904400 | 0.20333600  | -1.83593900 |
| H | 5.74852000 | -2.08267600 | -1.18313200 |
| H | 4.03667600 | -3.81869600 | -0.73132300 |
| H | 1.63009700 | -3.26943200 | -0.93102600 |

Glc-4B\_ACN

Charge=+1, Multiplicity=+1

|   |             |             |             |
|---|-------------|-------------|-------------|
| C | -2.47388500 | -2.56838600 | 1.23679300  |
| O | -3.16967100 | -1.33930400 | 1.46203600  |
| C | -2.46388400 | -2.65139400 | -0.29618000 |
| C | -1.62531400 | -1.57432100 | -0.98703400 |
| C | -2.35704900 | -0.28956500 | -0.54039600 |
| C | -3.57121000 | -0.92082400 | 0.16213700  |
| H | -3.08552900 | -3.40453100 | 1.59765200  |
| C | -1.19876000 | -2.62519600 | 2.04990400  |
| O | -3.77295600 | -2.12529600 | -0.54557200 |
| H | -2.36024300 | -3.65634300 | -0.69714300 |
| H | -4.48406000 | -0.33267200 | 0.21702600  |
| O | -2.70907600 | 0.46070500  | -1.67618500 |
| H | -1.75626700 | 0.30168000  | 0.15931100  |
| H | -1.79499500 | -1.68174200 | -2.06598500 |
| O | -0.25356400 | -1.66196500 | -0.71683700 |
| O | -0.52272000 | -1.34714300 | 2.06098000  |
| H | -0.52289100 | -3.40123700 | 1.68553500  |
| H | -1.44035900 | -2.81026500 | 3.09628400  |
| C | 0.69763300  | -1.27121800 | 1.72037700  |
| C | 1.39282600  | -0.04425500 | 1.79142000  |
| H | 1.21895200  | -2.17885000 | 1.41899400  |
| C | 2.77044700  | -0.06294000 | 1.50441900  |
| C | 0.75086600  | 1.15239800  | 2.17083200  |
| C | 1.49277900  | 2.30811000  | 2.26759200  |
| C | 2.86294400  | 2.28291500  | 1.98622900  |
| C | 3.50152100  | 1.10555200  | 1.60665100  |
| H | 3.24667700  | -0.99049500 | 1.20392300  |
| H | 3.43715300  | 3.20011500  | 2.06352800  |
| H | 4.56201900  | 1.10462900  | 1.38604300  |
| H | -0.31096400 | 1.15159600  | 2.38746800  |

|   |             |             |             |
|---|-------------|-------------|-------------|
| H | 1.01791600  | 3.23607500  | 2.55921700  |
| C | -3.05973500 | 1.80711700  | -1.38434200 |
| C | -1.87254500 | 2.64919700  | -0.99535400 |
| H | -3.82439200 | 1.85184300  | -0.59897600 |
| H | -3.50985900 | 2.18808700  | -2.30456200 |
| C | -1.91077200 | 3.45915800  | 0.13711100  |
| C | -0.82779200 | 4.27049600  | 0.46331000  |
| C | 0.31279800  | 4.26106900  | -0.33054200 |
| C | 0.36458200  | 3.44334700  | -1.45657600 |
| C | -0.72495600 | 2.64928500  | -1.79060100 |
| H | -2.79637200 | 3.45874500  | 0.76628300  |
| H | -0.87280600 | 4.90124800  | 1.34527500  |
| H | 1.16254100  | 4.88389900  | -0.07115900 |
| H | 1.25323700  | 3.43209400  | -2.07946500 |
| H | -0.69163400 | 2.02275300  | -2.67669200 |
| C | 0.52031400  | -0.86516100 | -1.60428400 |
| C | 1.97056900  | -1.22294200 | -1.48481800 |
| H | 0.37566700  | 0.19800300  | -1.37989500 |
| H | 0.16890500  | -1.03648900 | -2.63178100 |
| C | 2.93821000  | -0.25298700 | -1.74139700 |
| C | 4.28924900  | -0.56151000 | -1.64078100 |
| C | 4.68673300  | -1.84196900 | -1.26678600 |
| C | 3.72496800  | -2.81462200 | -1.01220600 |
| C | 2.37220000  | -2.50958100 | -1.13002000 |
| H | 2.63114600  | 0.75565000  | -2.00249400 |
| H | 5.03291500  | 0.20405400  | -1.83545500 |
| H | 5.74089300  | -2.07981300 | -1.17248700 |
| H | 4.02746800  | -3.81552400 | -0.72255700 |
| H | 1.62234700  | -3.26912100 | -0.93602200 |

Glc-4B\_DMSO

Charge=+1, Multiplicity=+1

|   |             |             |             |
|---|-------------|-------------|-------------|
| C | -2.47028600 | -2.57285100 | 1.23513900  |
| O | -3.16823000 | -1.34508700 | 1.46163700  |
| C | -2.46016800 | -2.65426800 | -0.29790900 |
| C | -1.62305400 | -1.57535700 | -0.98769900 |
| C | -2.35649300 | -0.29205600 | -0.53957400 |
| C | -3.56988500 | -0.92563800 | 0.16220900  |

|   |             |             |             |
|---|-------------|-------------|-------------|
| H | -3.08051100 | -3.41034000 | 1.59521300  |
| C | -1.19499400 | -2.62826800 | 2.04806700  |
| O | -3.77000500 | -2.12964700 | -0.54691700 |
| H | -2.35506100 | -3.65865400 | -0.69984900 |
| H | -4.48346000 | -0.33863600 | 0.21747400  |
| O | -2.70985200 | 0.45907400  | -1.67448000 |
| H | -1.75651200 | 0.29923200  | 0.16074700  |
| H | -1.79263400 | -1.68193400 | -2.06675400 |
| O | -0.25126100 | -1.66161200 | -0.71760700 |
| O | -0.52131500 | -1.34890900 | 2.05993300  |
| H | -0.51781000 | -3.40273800 | 1.68288500  |
| H | -1.43606600 | -2.81464200 | 3.09432400  |
| C | 0.69923700  | -1.27102700 | 1.72054500  |
| C | 1.39228400  | -0.04282600 | 1.79156900  |
| H | 1.22223300  | -2.17792100 | 1.41993200  |
| C | 2.76998400  | -0.05912600 | 1.50487400  |
| C | 0.74802800  | 1.15283500  | 2.17013200  |
| C | 1.48772900  | 2.31003500  | 2.26624100  |
| C | 2.85795100  | 2.28727800  | 1.98497000  |
| C | 3.49881100  | 1.11084800  | 1.60632800  |
| H | 3.24803100  | -0.98599700 | 1.20517800  |
| H | 3.43036700  | 3.20565200  | 2.06158300  |
| H | 4.55933900  | 1.11179900  | 1.38586500  |
| H | -0.31381200 | 1.15020400  | 2.38668000  |
| H | 1.01105600  | 3.23727700  | 2.55718800  |
| C | -3.06204400 | 1.80471000  | -1.38094500 |
| C | -1.87548100 | 2.64849400  | -0.99362300 |
| H | -3.82521300 | 1.84764600  | -0.59405100 |
| H | -3.51457300 | 2.18572600  | -2.29998900 |
| C | -1.91422300 | 3.45999100  | 0.13774000  |
| C | -0.83214800 | 4.27320300  | 0.46228200  |
| C | 0.30807200  | 4.26420900  | -0.33214500 |
| C | 0.36038700  | 3.44494800  | -1.45703400 |
| C | -0.72828400 | 2.64897900  | -1.78941400 |
| H | -2.79938100 | 3.45904700  | 0.76751900  |
| H | -0.87740800 | 4.90485900  | 1.34358400  |
| H | 1.15723800  | 4.88828700  | -0.07387700 |
| H | 1.24885200  | 3.43374800  | -2.08018000 |

|   |             |             |             |
|---|-------------|-------------|-------------|
| H | -0.69445400 | 2.02114400  | -2.67455200 |
| C | 0.52224800  | -0.86549700 | -1.60588900 |
| C | 1.97271800  | -1.22202600 | -1.48511800 |
| H | 0.37680400  | 0.19790800  | -1.38321600 |
| H | 0.17144600  | -1.03863600 | -2.63330500 |
| C | 2.37507600  | -2.50797300 | -1.12860900 |
| C | 3.72798900  | -2.81174800 | -1.00919600 |
| C | 4.68918600  | -1.83855600 | -1.26389900 |
| C | 4.29098800  | -0.55881200 | -1.63961400 |
| C | 2.93977700  | -0.25153100 | -1.74184600 |
| H | 1.62569400  | -3.26786200 | -0.93416800 |
| H | 4.03100100  | -3.81201400 | -0.71788800 |
| H | 5.74345100  | -2.07533800 | -1.16806900 |
| H | 5.03418500  | 0.20724900  | -1.83413300 |
| H | 2.63206700  | 0.75658500  | -2.00415600 |

Glc-4B\_Water

Charge=+1, Multiplicity=+1

|   |             |             |             |
|---|-------------|-------------|-------------|
| C | -2.46875100 | -2.57506900 | 1.23392400  |
| O | -3.16740200 | -1.34799600 | 1.46306300  |
| C | -2.46042700 | -2.65417900 | -0.29922200 |
| C | -1.62400100 | -1.57423100 | -0.98828200 |
| C | -2.35696900 | -0.29165100 | -0.53722000 |
| C | -3.56972800 | -0.92625800 | 0.16473300  |
| H | -3.07791100 | -3.41341500 | 1.59368400  |
| C | -1.19224300 | -2.63063700 | 2.04490500  |
| O | -3.77061500 | -2.12916900 | -0.54625900 |
| H | -2.35561100 | -3.65793800 | -0.70273100 |
| H | -4.48307900 | -0.33904300 | 0.22156300  |
| O | -2.71205900 | 0.46139000  | -1.67050300 |
| H | -1.75634300 | 0.29849800  | 0.16346500  |
| H | -1.79489500 | -1.67925200 | -2.06728700 |
| O | -0.25204900 | -1.66114300 | -0.71983600 |
| O | -0.51996100 | -1.35051100 | 2.05752200  |
| H | -0.51487100 | -3.40385300 | 1.67742500  |
| H | -1.43150200 | -2.81888600 | 3.09123200  |
| C | 0.70080500  | -1.27134400 | 1.71936900  |
| C | 1.39253300  | -0.04239400 | 1.79125500  |

|   |             |             |             |
|---|-------------|-------------|-------------|
| H | 1.22486100  | -2.17760600 | 1.41884900  |
| C | 2.77014300  | -0.05691100 | 1.50427900  |
| C | 0.74684200  | 1.15233800  | 2.17022800  |
| C | 1.48506000  | 2.31049600  | 2.26633800  |
| C | 2.85520700  | 2.28960600  | 1.98451200  |
| C | 3.49747300  | 1.11404000  | 1.60556100  |
| H | 3.24927500  | -0.98322000 | 1.20457100  |
| H | 3.42638600  | 3.20876600  | 2.06094100  |
| H | 4.55793100  | 1.11641000  | 1.38474900  |
| H | -0.31491600 | 1.14832600  | 2.38714600  |
| H | 1.00728100  | 3.23707600  | 2.55759700  |
| C | -3.06313100 | 1.80671200  | -1.37431200 |
| C | -1.87510000 | 2.65028000  | -0.99090100 |
| H | -3.82317700 | 1.84889100  | -0.58437900 |
| H | -3.51932400 | 2.18869500  | -2.29117600 |
| C | -1.91119500 | 3.46412200  | 0.13887100  |
| C | -0.82788900 | 4.27713600  | 0.45979900  |
| C | 0.31095200  | 4.26564800  | -0.33662300 |
| C | 0.36055100  | 3.44413600  | -1.46000800 |
| C | -0.72941000 | 2.64840600  | -1.78885100 |
| H | -2.79502600 | 3.46479900  | 0.77050200  |
| H | -0.87089100 | 4.91028700  | 1.34013900  |
| H | 1.16124800  | 4.88918600  | -0.08077900 |
| H | 1.24797000  | 3.43072400  | -2.08458300 |
| H | -0.69760200 | 2.01871700  | -2.67273200 |
| C | 0.52161800  | -0.86962800 | -1.61211700 |
| C | 1.97215900  | -1.22461700 | -1.48752500 |
| H | 0.37524900  | 0.19497300  | -1.39605100 |
| H | 0.17193900  | -1.04944300 | -2.63879400 |
| C | 2.93919900  | -0.25398400 | -1.74370600 |
| C | 4.29041000  | -0.56024400 | -1.63773600 |
| C | 4.68851100  | -1.83904400 | -1.25875200 |
| C | 3.72730400  | -2.81240600 | -1.00449200 |
| C | 2.37450900  | -2.50972400 | -1.12773600 |
| H | 2.63147700  | 0.75349300  | -2.00837300 |
| H | 5.03356600  | 0.20604600  | -1.83153200 |
| H | 5.74269000  | -2.07489700 | -1.15963800 |
| H | 4.03020500  | -3.81182500 | -0.71017700 |

|   |            |             |             |
|---|------------|-------------|-------------|
| H | 1.62517100 | -3.26966800 | -0.93328900 |
|---|------------|-------------|-------------|

Glc-6B\_Dioxane

Charge=+1, Multiplicity=+1

|   |             |             |             |
|---|-------------|-------------|-------------|
| C | 1.57008800  | -3.10597800 | -0.32101600 |
| O | 0.91592400  | -3.08021100 | 0.93490400  |
| C | 1.83758100  | -2.36670600 | 1.73808800  |
| C | 1.72878700  | -0.87469300 | 1.43771500  |
| O | 0.48065200  | -0.45719100 | 1.94643500  |
| C | 1.37194800  | -1.74658400 | -0.97759500 |
| O | 3.15471100  | -0.25550300 | -0.38428800 |
| O | -0.02744500 | -1.65485600 | -1.38164100 |
| H | 1.13850400  | -3.90149000 | -0.92831400 |
| C | 3.03254100  | -3.34306800 | 0.06121800  |
| O | 3.10750300  | -2.84523300 | 1.39384800  |
| H | 1.61932000  | -2.57342600 | 2.78583700  |
| H | 3.73551400  | -2.80537000 | -0.57796500 |
| H | 3.26775700  | -4.40921200 | 0.06351200  |
| C | 0.39159900  | 0.94662600  | 2.23821200  |
| C | -0.97763900 | 1.43364800  | 1.87373300  |
| H | 1.14553400  | 1.49533300  | 1.66431600  |
| H | 0.59781900  | 1.08846500  | 3.30406300  |
| C | -1.20682300 | 2.00003400  | 0.61921400  |
| C | -2.48201300 | 2.41460800  | 0.25413200  |
| C | -3.54079100 | 2.26914600  | 1.14409600  |
| C | -3.32005000 | 1.71195800  | 2.40025700  |
| C | -2.04358900 | 1.29532200  | 2.76267000  |
| H | -0.37804400 | 2.14386200  | -0.06879900 |
| H | -2.64704000 | 2.86104200  | -0.72081600 |
| H | -4.53501700 | 2.60143900  | 0.86509900  |
| H | -4.14153100 | 1.61006000  | 3.10165500  |
| H | -1.86974400 | 0.86749000  | 3.74543400  |
| C | 3.30654300  | 0.61356100  | -1.50727000 |
| C | 2.58821300  | 1.92240900  | -1.32803200 |
| H | 4.38489400  | 0.76188500  | -1.59012800 |
| H | 2.96628700  | 0.12513900  | -2.43084200 |
| C | 1.62344000  | 2.33618600  | -2.24346500 |
| C | 0.96133100  | 3.54942600  | -2.07518000 |

|   |             |             |             |
|---|-------------|-------------|-------------|
| C | 1.25027700  | 4.34966000  | -0.97710700 |
| C | 2.20679800  | 3.93842100  | -0.05163800 |
| C | 2.87526500  | 2.73447800  | -0.22854800 |
| H | 1.39539600  | 1.70833300  | -3.10027600 |
| H | 0.21899400  | 3.86606400  | -2.80018200 |
| H | 0.73276800  | 5.29285000  | -0.83976600 |
| H | 2.43642500  | 4.56401000  | 0.80433200  |
| H | 3.62734600  | 2.41717300  | 0.48797800  |
| C | -0.93694600 | -1.37714100 | -0.52789700 |
| C | 1.82387400  | -0.57798000 | -0.07529800 |
| H | 2.55710500  | -0.35487000 | 1.92923700  |
| H | 1.90025000  | -1.69537000 | -1.92906700 |
| H | 1.17063500  | 0.28198900  | -0.28022000 |
| C | -2.29819500 | -1.40039400 | -0.89687200 |
| C | -2.72961800 | -1.75956700 | -2.19083900 |
| C | -4.07722200 | -1.75262200 | -2.47306700 |
| C | -4.99604600 | -1.39344000 | -1.47922800 |
| C | -4.57677100 | -1.03638100 | -0.20083300 |
| C | -3.22725500 | -1.03728600 | 0.09647700  |
| H | -2.87502600 | -0.75181500 | 1.08239700  |
| H | -6.05556200 | -1.39331700 | -1.71289500 |
| H | -5.30020100 | -0.75323700 | 0.55424600  |
| H | -2.00130900 | -2.03673300 | -2.94429000 |
| H | -4.43082700 | -2.02513200 | -3.46037700 |
| H | -0.64296500 | -1.10304400 | 0.49021500  |

Glc-6B\_Toluene

Charge=+1, Multiplicity=+1

|   |             |             |             |
|---|-------------|-------------|-------------|
| C | 1.57203000  | -3.10534000 | -0.31886100 |
| O | 0.91806400  | -3.07911100 | 0.93741200  |
| C | 1.83918900  | -2.36422000 | 1.73977600  |
| C | 1.72930300  | -0.87264000 | 1.43810300  |
| O | 0.48084900  | -0.45576300 | 1.94662700  |
| C | 1.37335700  | -1.74672200 | -0.97660900 |
| O | 3.15494200  | -0.25335400 | -0.38371000 |
| O | -0.02585800 | -1.65613300 | -1.38138700 |
| H | 1.14068100  | -3.90142200 | -0.92550300 |
| C | 3.03446000  | -3.34167200 | 0.06335400  |

|   |             |             |             |
|---|-------------|-------------|-------------|
| O | 3.10957400  | -2.84222900 | 1.39566200  |
| H | 1.62145800  | -2.57019200 | 2.78777500  |
| H | 3.73721500  | -2.80476800 | -0.57668500 |
| H | 3.26963700  | -4.40779200 | 0.06691100  |
| C | 0.39127700  | 0.94815000  | 2.23776400  |
| C | -0.97861300 | 1.43437400  | 1.87461200  |
| H | 1.14428100  | 1.49694200  | 1.66272100  |
| H | 0.59877600  | 1.09052800  | 3.30329100  |
| C | -1.20939400 | 2.00145300  | 0.62070400  |
| C | -2.48524000 | 2.41528300  | 0.25703100  |
| C | -3.54314100 | 2.26832800  | 1.14778500  |
| C | -3.32091500 | 1.71022700  | 2.40326200  |
| C | -2.04376900 | 1.29451100  | 2.76430800  |
| H | -0.38144000 | 2.14596000  | -0.06817500 |
| H | -2.65153800 | 2.86195900  | -0.71756200 |
| H | -4.53799700 | 2.59939300  | 0.86960700  |
| H | -4.14178300 | 1.60670600  | 3.10510200  |
| H | -1.86885600 | 0.86591400  | 3.74652200  |
| C | 3.30681400  | 0.61473500  | -1.50746500 |
| C | 2.58739200  | 1.92320900  | -1.32960000 |
| H | 4.38510100  | 0.76387000  | -1.58985500 |
| H | 2.96753100  | 0.12526900  | -2.43073800 |
| C | 1.62197000  | 2.33491800  | -2.24528200 |
| C | 0.95826700  | 3.54741700  | -2.07802200 |
| C | 1.24640300  | 4.34909000  | -0.98076000 |
| C | 2.20375400  | 3.94005400  | -0.05513300 |
| C | 2.87369600  | 2.73675200  | -0.23100000 |
| H | 1.39423700  | 1.70557900  | -3.10103700 |
| H | 0.21509900  | 3.86217200  | -2.80297100 |
| H | 0.72747200  | 5.29160300  | -0.84412900 |
| H | 2.43266800  | 4.56668600  | 0.80025000  |
| H | 3.62624300  | 2.42114300  | 0.48575300  |
| C | -0.93588900 | -1.37754400 | -0.52858300 |
| C | 1.82412400  | -0.57703200 | -0.07513200 |
| H | 2.55710100  | -0.35173400 | 1.92936900  |
| H | 1.90184500  | -1.69621600 | -1.92800600 |
| H | 1.17000700  | 0.28203300  | -0.28077100 |
| C | -2.29694700 | -1.40218000 | -0.89811700 |



|   |             |             |             |
|---|-------------|-------------|-------------|
| C | -2.72760900 | -1.76313200 | -2.19182700 |
| C | -4.07512200 | -1.75721300 | -2.47454500 |
| C | -4.99452900 | -1.39735300 | -1.48149600 |
| C | -4.57596800 | -1.03863300 | -0.20331300 |
| C | -3.22655600 | -1.03846100 | 0.09445300  |
| H | -2.87481900 | -0.75179000 | 1.08014600  |
| H | -6.05392100 | -1.39807400 | -1.71562100 |
| H | -5.29977400 | -0.75503900 | 0.55119600  |
| H | -1.99887800 | -2.04071600 | -2.94467700 |
| H | -4.42818900 | -2.03106000 | -3.46166400 |
| H | -0.64278400 | -1.10238700 | 0.48947300  |

Glc-6B\_Et<sub>2</sub>O

Charge=+1, Multiplicity=+1

|   |             |             |             |
|---|-------------|-------------|-------------|
| C | 1.61153000  | -3.07887600 | -0.37092500 |
| O | 0.98949600  | -3.08917800 | 0.90281400  |
| C | 1.91558500  | -2.37122200 | 1.69484800  |
| C | 1.76867300  | -0.87708800 | 1.42535500  |
| O | 0.52228700  | -0.49731600 | 1.96648300  |
| C | 1.38100800  | -1.71133900 | -0.99808400 |
| O | 3.14648000  | -0.19272900 | -0.40763200 |
| O | -0.02393600 | -1.63027400 | -1.38213600 |
| H | 1.17784800  | -3.86918100 | -0.98288400 |
| C | 3.08572700  | -3.29939800 | -0.02948400 |
| O | 3.18758300  | -2.81668600 | 1.30875400  |
| H | 1.72987800  | -2.60105200 | 2.74407000  |
| H | 3.76443300  | -2.74383100 | -0.67928300 |
| H | 3.33556200  | -4.36195100 | -0.04722300 |
| C | 0.40497300  | 0.90043300  | 2.27877000  |
| C | -0.96234700 | 1.37761300  | 1.89321800  |
| H | 1.16466700  | 1.46846600  | 1.73260800  |
| H | 0.58450900  | 1.02609400  | 3.35110500  |
| C | -2.03914700 | 1.23575600  | 2.76833100  |
| C | -3.31337100 | 1.64321000  | 2.38773700  |
| C | -3.52117500 | 2.19544600  | 1.12724100  |
| C | -2.45133600 | 2.34598700  | 0.25128300  |
| C | -1.17875400 | 1.93984200  | 0.63427000  |
| H | -1.87592800 | 0.81063600  | 3.75416800  |

|   |             |             |             |
|---|-------------|-------------|-------------|
| H | -4.14405400 | 1.53462500  | 3.07713500  |
| H | -4.51463800 | 2.51605000  | 0.83219300  |
| H | -2.60550000 | 2.78854000  | -0.72725000 |
| H | -0.34296900 | 2.08672300  | -0.04431400 |
| C | 3.26154000  | 0.69250400  | -1.52169000 |
| C | 2.51798400  | 1.98425000  | -1.31665500 |
| H | 4.33490300  | 0.86638100  | -1.61918400 |
| H | 2.91868200  | 0.20867400  | -2.44599100 |
| C | 1.56391200  | 2.40895900  | -2.23845900 |
| C | 0.88004400  | 3.60707100  | -2.04936000 |
| C | 1.13686000  | 4.38185000  | -0.92512600 |
| C | 2.08242000  | 3.95932500  | 0.00653900  |
| C | 2.77200900  | 2.77024500  | -0.19030800 |
| H | 1.35843000  | 1.79973300  | -3.11406100 |
| H | 0.14319800  | 3.92984900  | -2.77723300 |
| H | 0.60027800  | 5.31167900  | -0.77061100 |
| H | 2.28491500  | 4.56237200  | 0.88524300  |
| H | 3.51290500  | 2.44301300  | 0.53321500  |
| C | -0.92982500 | -1.39142900 | -0.51379600 |
| C | 1.82789200  | -0.55091500 | -0.08284600 |
| H | 2.59453900  | -0.34841400 | 1.91165100  |
| H | 1.89495700  | -1.63778000 | -1.95550800 |
| H | 1.15310700  | 0.29792100  | -0.25902200 |
| C | -2.29264700 | -1.41621100 | -0.87750300 |
| C | -2.72285900 | -1.72197100 | -2.18535100 |
| C | -4.07129400 | -1.72015900 | -2.46404700 |
| C | -4.99208100 | -1.41918900 | -1.45300700 |
| C | -4.57388400 | -1.11573000 | -0.16036500 |
| C | -3.22348500 | -1.11127300 | 0.13326100  |
| H | -2.87185800 | -0.86585800 | 1.12975200  |
| H | -6.05208000 | -1.42223600 | -1.68395700 |
| H | -5.29954800 | -0.87869100 | 0.60827100  |
| H | -1.99302600 | -1.95424400 | -2.95211600 |
| H | -4.42317500 | -1.95254200 | -3.46212500 |
| H | -0.63304700 | -1.15165100 | 0.51201600  |

Glc-6B\_CHCl<sub>3</sub>

Charge=+1, Multiplicity=+1

|   |             |             |             |
|---|-------------|-------------|-------------|
| C | 1.61078400  | -3.08007100 | -0.37244900 |
| O | 0.99146300  | -3.09033400 | 0.90285500  |
| C | 1.91862000  | -2.37160400 | 1.69262200  |
| C | 1.77030400  | -0.87767200 | 1.42303200  |
| O | 0.52436600  | -0.49881700 | 1.96578200  |
| C | 1.37946200  | -1.71272800 | -0.99968300 |
| O | 3.14532100  | -0.19316300 | -0.41198100 |
| O | -0.02572200 | -1.63123400 | -1.38259000 |
| H | 1.17584500  | -3.87038800 | -0.98340700 |
| C | 3.08546500  | -3.30075300 | -0.03379500 |
| O | 3.19032400  | -2.81639000 | 1.30383000  |
| H | 1.73541500  | -2.60120600 | 2.74234600  |
| H | 3.76309100  | -2.74629800 | -0.68560500 |
| H | 3.33471900  | -4.36344400 | -0.05087900 |
| C | 0.40635200  | 0.89896600  | 2.27773900  |
| C | -0.96134500 | 1.37527200  | 1.89243500  |
| H | 1.16558600  | 1.46722300  | 1.73122100  |
| H | 0.58613400  | 1.02498500  | 3.34997700  |
| C | -2.03782200 | 1.23311200  | 2.76789300  |
| C | -3.31249600 | 1.63921500  | 2.38735100  |
| C | -3.52110900 | 2.19040100  | 1.12652300  |
| C | -2.45159800 | 2.34126700  | 0.25020500  |
| C | -1.17855200 | 1.93655400  | 0.63320000  |
| H | -1.87409000 | 0.80846900  | 3.75385000  |
| H | -4.14298800 | 1.52991600  | 3.07685700  |
| H | -4.51504400 | 2.50932800  | 0.83124300  |
| H | -2.60642600 | 2.78241700  | -0.72884800 |
| H | -0.34310100 | 2.08336500  | -0.04581100 |
| C | 3.25798900  | 0.69361400  | -1.52499600 |
| C | 2.51653500  | 1.98598900  | -1.31562100 |
| H | 4.33122200  | 0.86656700  | -1.62556300 |
| H | 2.91175800  | 0.21166300  | -2.44888900 |
| C | 1.56324500  | 2.41539500  | -2.23614500 |
| C | 0.88162100  | 3.61419300  | -2.04319300 |
| C | 1.13972600  | 4.38486300  | -0.91638900 |
| C | 2.08439900  | 3.95755500  | 0.01400200  |
| C | 2.77188400  | 2.76787800  | -0.18671400 |
| H | 1.35624100  | 1.80907800  | -3.11342600 |

|   |             |             |             |
|---|-------------|-------------|-------------|
| H | 0.14503200  | 3.94039200  | -2.76980300 |
| H | 0.60462700  | 5.31503400  | -0.75876100 |
| H | 2.28770200  | 4.55714000  | 0.89489400  |
| H | 3.51180500  | 2.43673700  | 0.53602400  |
| C | -0.93105900 | -1.39331000 | -0.51356100 |
| C | 1.82726100  | -0.55191500 | -0.08532700 |
| H | 2.59631700  | -0.34822100 | 1.90822400  |
| H | 1.89266500  | -1.63977900 | -1.95751800 |
| H | 1.15186400  | 0.29652800  | -0.26076300 |
| C | -2.29404400 | -1.41514200 | -0.87685700 |
| C | -2.72487000 | -1.71285300 | -2.18632300 |
| C | -4.07341800 | -1.70856000 | -2.46452300 |
| C | -4.99370200 | -1.41338500 | -1.45133200 |
| C | -4.57485900 | -1.11785800 | -0.15704500 |
| C | -3.22432100 | -1.11545400 | 0.13598400  |
| H | -2.87217200 | -0.87584500 | 1.13368700  |
| H | -6.05378200 | -1.41453300 | -1.68187800 |
| H | -5.30014000 | -0.88517300 | 0.61326600  |
| H | -1.99542900 | -1.94086100 | -2.95470700 |
| H | -4.42568800 | -1.93463200 | -3.46390800 |
| H | -0.63388300 | -1.15676800 | 0.51281900  |

Glc-6B\_DCM

Charge=+1, Multiplicity=+1

|   |            |             |             |
|---|------------|-------------|-------------|
| C | 1.81406600 | -2.96612100 | -0.38848000 |
| O | 1.19315300 | -3.02920100 | 0.88524600  |
| C | 2.07451600 | -2.26865800 | 1.68687200  |
| C | 1.83948500 | -0.78302900 | 1.43683800  |
| O | 0.57094500 | -0.48880100 | 1.98031900  |
| C | 1.51214200 | -1.60597300 | -1.00025400 |
| O | 3.16435000 | 0.03246500  | -0.38262300 |
| O | 0.11004400 | -1.59805600 | -1.40113800 |
| H | 1.42587800 | -3.77072200 | -1.01175100 |
| C | 3.29753800 | -3.10868900 | -0.04753900 |
| O | 3.37195400 | -2.63411500 | 1.29659000  |
| H | 1.90295800 | -2.52166400 | 2.73326400  |
| H | 3.94504800 | -2.51052400 | -0.69116500 |
| H | 3.60593100 | -4.15536000 | -0.07612000 |

|   |             |             |             |
|---|-------------|-------------|-------------|
| C | 0.37047700  | 0.89322400  | 2.31700000  |
| C | -1.03210500 | 1.28313500  | 1.96199800  |
| H | 1.08151400  | 1.51753100  | 1.76636400  |
| H | 0.56169200  | 1.01585700  | 3.38779300  |
| C | -1.30701300 | 1.84789800  | 0.71598100  |
| C | -2.60998400 | 2.17509400  | 0.36023200  |
| C | -3.65253500 | 1.93982000  | 1.25049900  |
| C | -3.38733500 | 1.38020900  | 2.49705400  |
| C | -2.08232900 | 1.05341900  | 2.85059700  |
| H | -0.49509800 | 2.05606700  | 0.02485300  |
| H | -2.80950200 | 2.61887400  | -0.60957100 |
| H | -4.67034200 | 2.19549300  | 0.97567100  |
| H | -4.19746200 | 1.20118300  | 3.19603900  |
| H | -1.87495700 | 0.62210200  | 3.82530800  |
| C | 3.21330200  | 0.91133900  | -1.50802100 |
| C | 2.34880800  | 2.13023400  | -1.33301800 |
| H | 4.26675500  | 1.18456300  | -1.59175000 |
| H | 2.93289700  | 0.38437800  | -2.42861200 |
| C | 1.33427200  | 2.42083100  | -2.24300400 |
| C | 0.53866700  | 3.55202700  | -2.07871400 |
| C | 0.74425300  | 4.39297000  | -0.99182000 |
| C | 1.74866000  | 4.10287700  | -0.07099700 |
| C | 2.54849500  | 2.98086300  | -0.24311500 |
| H | 1.16759000  | 1.75957400  | -3.08881000 |
| H | -0.24567300 | 3.76999500  | -2.79581600 |
| H | 0.12083800  | 5.27034500  | -0.85694700 |
| H | 1.91009600  | 4.75622700  | 0.77984200  |
| H | 3.33455200  | 2.75720000  | 0.47203500  |
| C | -0.81613000 | -1.41929300 | -0.54076100 |
| C | 1.87735600  | -0.43157700 | -0.06604800 |
| H | 2.62978500  | -0.21161000 | 1.93369200  |
| H | 2.03343200  | -1.49362800 | -1.94959600 |
| H | 1.14191500  | 0.36760800  | -0.22975000 |
| C | -2.17230700 | -1.50767300 | -0.91891400 |
| C | -3.12740300 | -1.27641900 | 0.08890800  |
| C | -4.47280000 | -1.35041400 | -0.21808800 |
| C | -4.86212600 | -1.64755100 | -1.52134900 |
| C | -3.91722300 | -1.87350700 | -2.52956000 |

|   |             |             |             |
|---|-------------|-------------|-------------|
| C | -2.57312400 | -1.80735500 | -2.23737900 |
| H | -1.82500000 | -1.98211200 | -3.00164500 |
| H | -5.91828300 | -1.70413600 | -1.76256400 |
| H | -4.24636900 | -2.10185800 | -3.53626800 |
| H | -2.79892800 | -1.03379600 | 1.09408800  |
| H | -5.21729000 | -1.17159300 | 0.54813100  |
| H | -0.54328300 | -1.18441100 | 0.49262100  |

Glc-6B\_ACN

Charge=+1, Multiplicity=+1

|   |             |             |             |
|---|-------------|-------------|-------------|
| C | 1.68208500  | -3.04759200 | -0.38098700 |
| O | 1.08235300  | -3.07520300 | 0.90538200  |
| C | 2.00042700  | -2.33300000 | 1.68124600  |
| C | 1.80951800  | -0.84375700 | 1.41553100  |
| O | 0.55884800  | -0.50143800 | 1.97186000  |
| C | 1.41699700  | -1.68549000 | -1.00483800 |
| O | 3.14338700  | -0.11189000 | -0.43257400 |
| O | 0.01063300  | -1.63144300 | -1.38524600 |
| H | 1.25607300  | -3.84542700 | -0.98763400 |
| C | 3.16466400  | -3.23813200 | -0.06274300 |
| O | 3.27956100  | -2.74497500 | 1.27309400  |
| H | 1.83995600  | -2.56686600 | 2.73390100  |
| H | 3.82184900  | -2.67406300 | -0.72661900 |
| H | 3.43388300  | -4.29576600 | -0.07939300 |
| C | 0.40621300  | 0.89224000  | 2.28680000  |
| C | -0.97799000 | 1.33142100  | 1.91646800  |
| H | 1.14416400  | 1.48131400  | 1.73338300  |
| H | 0.59414800  | 1.02241800  | 3.35712900  |
| C | -2.04136900 | 1.15698100  | 2.80215100  |
| C | -3.33092900 | 1.52726700  | 2.43517800  |
| C | -3.56767900 | 2.07533200  | 1.17776300  |
| C | -2.51169200 | 2.25735000  | 0.29080400  |
| C | -1.22394900 | 1.88758300  | 0.66032100  |
| H | -1.85631300 | 0.73262400  | 3.78445400  |
| H | -4.15173700 | 1.38835900  | 3.13085900  |
| H | -4.57399700 | 2.36182500  | 0.89122200  |
| H | -2.68886900 | 2.69069500  | -0.68795200 |
| H | -0.40120400 | 2.05287600  | -0.02965300 |

|   |             |             |             |
|---|-------------|-------------|-------------|
| C | 3.20872100  | 0.77237800  | -1.55186200 |
| C | 2.44095800  | 2.04747100  | -1.32820600 |
| H | 4.27453100  | 0.97175800  | -1.67887600 |
| H | 2.85182200  | 0.27789700  | -2.46385000 |
| C | 2.70163500  | 2.83685000  | -0.20558100 |
| C | 1.98951400  | 4.00957600  | 0.00996100  |
| C | 1.01446700  | 4.41252400  | -0.90005400 |
| C | 0.75015800  | 3.63362300  | -2.02014500 |
| C | 1.45646900  | 2.45147200  | -2.22766500 |
| H | 3.46285700  | 2.52343200  | 0.50270000  |
| H | 2.19588400  | 4.61307000  | 0.88758500  |
| H | 0.45844500  | 5.32837400  | -0.73031000 |
| H | -0.01420600 | 3.93753000  | -2.72746600 |
| H | 1.23943600  | 1.83541700  | -3.09556000 |
| C | -0.89954300 | -1.42070000 | -0.51615700 |
| C | 1.84061700  | -0.51413900 | -0.09205200 |
| H | 2.62420000  | -0.29224900 | 1.89540000  |
| H | 1.92674900  | -1.60234700 | -1.96335500 |
| H | 1.13858000  | 0.31381800  | -0.25815700 |
| C | -2.26130300 | -1.45123700 | -0.88464100 |
| C | -3.20036000 | -1.19736300 | 0.13243800  |
| C | -4.54940800 | -1.20935100 | -0.16757400 |
| C | -4.95775400 | -1.46665600 | -1.47358200 |
| C | -4.02842800 | -1.71514600 | -2.49078000 |
| C | -2.68109000 | -1.71127000 | -2.20540800 |
| H | -1.94471900 | -1.90228600 | -2.97707400 |
| H | -6.01651200 | -1.47297200 | -1.70987400 |
| H | -4.37164000 | -1.91071700 | -3.49968300 |
| H | -2.85679200 | -0.98594000 | 1.13942100  |
| H | -5.28179900 | -1.01193200 | 0.60575200  |
| H | -0.60873500 | -1.20065200 | 0.51521500  |

Glc-6B\_DMSO

Charge=+1, Multiplicity=+1

|   |            |             |             |
|---|------------|-------------|-------------|
| C | 1.69456100 | -3.04143100 | -0.37935200 |
| O | 1.09457600 | -3.07068800 | 0.90696000  |
| C | 2.00966200 | -2.32481600 | 1.68271800  |
| C | 1.81341200 | -0.83643400 | 1.41635200  |

|   |             |             |             |
|---|-------------|-------------|-------------|
| O | 0.56112700  | -0.49857600 | 1.97188000  |
| C | 1.42519800  | -1.68050900 | -1.00392100 |
| O | 3.14503500  | -0.09948100 | -0.43134800 |
| O | 0.01905300  | -1.63151400 | -1.38562400 |
| H | 1.27151100  | -3.84093200 | -0.98583300 |
| C | 3.17761100  | -3.22690500 | -0.06051700 |
| O | 3.29048300  | -2.73228600 | 1.27507200  |
| H | 1.84976500  | -2.55881000 | 2.73544300  |
| H | 3.83316400  | -2.66124100 | -0.72461000 |
| H | 3.45026900  | -4.28366100 | -0.07628100 |
| C | 0.40365800  | 0.89462800  | 2.28628100  |
| C | -0.98348100 | 1.32745500  | 1.91958400  |
| H | 1.13742200  | 1.48641400  | 1.73016600  |
| H | 0.59429300  | 1.02654800  | 3.35593700  |
| C | -2.04382100 | 1.14769600  | 2.80787200  |
| C | -3.33603100 | 1.51200500  | 2.44424100  |
| C | -3.57846100 | 2.05949600  | 1.18763300  |
| C | -2.52558600 | 2.24657100  | 0.29801500  |
| C | -1.23520300 | 1.88258000  | 0.66413800  |
| H | -1.85430700 | 0.72380700  | 3.78953100  |
| H | -4.15448100 | 1.36883100  | 3.14183900  |
| H | -4.58685300 | 2.34124100  | 0.90365700  |
| H | -2.70729800 | 2.67897000  | -0.68033200 |
| H | -0.41511100 | 2.05114900  | -0.02818900 |
| C | 3.20713000  | 0.78390700  | -1.55163300 |
| C | 2.43237700  | 2.05513500  | -1.33028400 |
| H | 4.27203800  | 0.98880500  | -1.67740700 |
| H | 2.85408600  | 0.28642400  | -2.46340600 |
| C | 2.69078700  | 2.84932700  | -0.21050700 |
| C | 1.97206300  | 4.01834900  | 0.00331200  |
| C | 0.99248200  | 4.41270700  | -0.90562900 |
| C | 0.73025200  | 3.62888300  | -2.02279800 |
| C | 1.44327600  | 2.45044700  | -2.22857300 |
| H | 3.45546200  | 2.54257600  | 0.49698700  |
| H | 2.17676600  | 4.62559300  | 0.87875100  |
| H | 0.43125400  | 5.32564800  | -0.73724800 |
| H | -0.03780400 | 3.92590400  | -2.72905400 |
| H | 1.22769100  | 1.83037100  | -3.09396000 |



|   |             |             |             |
|---|-------------|-------------|-------------|
| C | -0.89267000 | -1.42322000 | -0.51765500 |
| C | 1.84380100  | -0.50720700 | -0.09129300 |
| H | 2.62572300  | -0.28170300 | 1.89652300  |
| H | 1.93549800  | -1.59606700 | -1.96201300 |
| H | 1.13853600  | 0.31788900  | -0.25789600 |
| C | -2.25392600 | -1.45759000 | -0.88762100 |
| C | -3.19488500 | -1.20669100 | 0.12843900  |
| C | -4.54353100 | -1.22241700 | -0.17318200 |
| C | -4.94960700 | -1.48035400 | -1.47979300 |
| C | -4.01838200 | -1.72583700 | -2.49597500 |
| C | -2.67138800 | -1.71829400 | -2.20898400 |
| H | -1.93354400 | -1.90682800 | -2.97985400 |
| H | -6.00807000 | -1.48948200 | -1.71734000 |
| H | -4.35980000 | -1.92187900 | -3.50539900 |
| H | -2.85315600 | -0.99457800 | 1.13592800  |
| H | -5.27739600 | -1.02727600 | 0.59932700  |
| H | -0.60362700 | -1.20225100 | 0.51399000  |

Glc-6B\_Water

Charge=+1, Multiplicity=+1

|   |             |             |             |
|---|-------------|-------------|-------------|
| C | 1.71845700  | -3.02889700 | -0.37868200 |
| O | 1.11791000  | -3.06285000 | 0.90736900  |
| C | 2.02716800  | -2.31088800 | 1.68390200  |
| C | 1.82069500  | -0.82384700 | 1.41801000  |
| O | 0.56556000  | -0.49514800 | 1.97271200  |
| C | 1.44067200  | -1.66959900 | -1.00300200 |
| O | 3.14781400  | -0.07497300 | -0.42798700 |
| O | 0.03487300  | -1.62993800 | -1.38696100 |
| H | 1.30118100  | -3.83090400 | -0.98580200 |
| C | 3.20244800  | -3.20455500 | -0.05891900 |
| O | 3.31120600  | -2.70924600 | 1.27688400  |
| H | 1.86834800  | -2.54634400 | 2.73647600  |
| H | 3.85463500  | -2.63451300 | -0.72256800 |
| H | 3.48217600  | -4.25944900 | -0.07461400 |
| C | 0.39869400  | 0.89663100  | 2.28824400  |
| C | -0.99301300 | 1.31864300  | 1.92638600  |
| H | 1.12594300  | 1.49422100  | 1.72973400  |
| H | 0.59213500  | 1.02977600  | 3.35726800  |

|   |             |             |             |
|---|-------------|-------------|-------------|
| C | -2.04916200 | 1.12898600  | 2.81761600  |
| C | -3.34541200 | 1.48316500  | 2.45837100  |
| C | -3.59605800 | 2.03053500  | 1.20330400  |
| C | -2.54746600 | 2.22716600  | 0.31067500  |
| C | -1.25307200 | 1.87304400  | 0.67234500  |
| H | -1.85321500 | 0.70525500  | 3.79807300  |
| H | -4.16059500 | 1.33210700  | 3.15812000  |
| H | -4.60759700 | 2.30424900  | 0.92268500  |
| H | -2.73569600 | 2.65885000  | -0.66675100 |
| H | -0.43667300 | 2.04817000  | -0.02267700 |
| C | 3.20405400  | 0.80725200  | -1.54972600 |
| C | 2.41506200  | 2.07046700  | -1.33303300 |
| H | 4.26711100  | 1.02335500  | -1.67223000 |
| H | 2.85953500  | 0.30427700  | -2.46164700 |
| C | 2.66758500  | 2.87364100  | -0.21829700 |
| C | 1.93564700  | 4.03511900  | -0.00821000 |
| C | 0.94835500  | 4.41282300  | -0.91590700 |
| C | 0.69164600  | 3.61983300  | -2.02789700 |
| C | 1.41810200  | 2.44896000  | -2.22993100 |
| H | 3.43820400  | 2.57987500  | 0.48826400  |
| H | 2.13598900  | 4.64941800  | 0.86331100  |
| H | 0.37675800  | 5.31986500  | -0.75047400 |
| H | -0.08258700 | 3.90359400  | -2.73285700 |
| H | 1.20670800  | 1.82156500  | -3.09105300 |
| C | -0.87948100 | -1.42728300 | -0.52056900 |
| C | 1.84964700  | -0.49359400 | -0.08938800 |
| H | 2.62856700  | -0.26351200 | 1.89916500  |
| H | 1.95189400  | -1.58140600 | -1.96024700 |
| H | 1.13806900  | 0.32606700  | -0.25594300 |
| C | -2.23995700 | -1.46939800 | -0.89268500 |
| C | -3.18400800 | -1.22436800 | 0.12193700  |
| C | -4.53202700 | -1.24750700 | -0.18199100 |
| C | -4.93444300 | -1.50695800 | -1.48945500 |
| C | -4.00014500 | -1.74662500 | -2.50417200 |
| C | -2.65367500 | -1.73164200 | -2.21489400 |
| H | -1.91345900 | -1.91538300 | -2.98463500 |
| H | -5.99243500 | -1.52179700 | -1.72880300 |
| H | -4.33869700 | -1.94389000 | -3.51431900 |

|   |             |             |            |
|---|-------------|-------------|------------|
| H | -2.84525700 | -1.01088300 | 1.13016200 |
| H | -5.26827600 | -1.05682100 | 0.58935400 |
| H | -0.59354000 | -1.20513000 | 0.51167700 |

Gal-4B\_Dioxane

Charge=+1, Multiplicity=+1

|   |             |             |             |
|---|-------------|-------------|-------------|
| O | -1.29392800 | -0.08978900 | -0.81986400 |
| C | -1.11662100 | -1.35591000 | -0.26303000 |
| C | -0.23484600 | 0.54092800  | -0.08005600 |
| O | -1.23200400 | -1.12968100 | 1.15084400  |
| C | 0.99480600  | -0.28598500 | -0.47858700 |
| C | 0.33949300  | -1.68762800 | -0.61081000 |
| H | 1.74914400  | -0.29772100 | 0.31358700  |
| O | 1.55563300  | 0.10957300  | -1.70007800 |
| O | 0.82021600  | -2.68675100 | 0.23479800  |
| H | 0.39210100  | -1.99066100 | -1.66524300 |
| H | -1.87905300 | -2.06441300 | -0.57686500 |
| C | -0.59702200 | 0.12948500  | 1.35607200  |
| C | -1.55595800 | 1.04988300  | 2.08936700  |
| H | 0.29351000  | 0.01073400  | 1.98230200  |
| H | -0.20054400 | 1.60591800  | -0.28792900 |
| C | 2.01354700  | -3.31841900 | -0.21027500 |
| C | 3.25355900  | -2.48942300 | 0.00033600  |
| H | 1.91892800  | -3.59218700 | -1.26906400 |
| H | 2.07471500  | -4.24068700 | 0.37305100  |
| C | 4.12046200  | -2.21943900 | -1.05365700 |
| C | 5.27300300  | -1.46541400 | -0.84753300 |
| C | 5.55820400  | -0.96200300 | 0.41534500  |
| C | 4.69276700  | -1.22411700 | 1.47540300  |
| C | 3.55257000  | -1.98893400 | 1.26947400  |
| H | 3.89051600  | -2.59523600 | -2.04627200 |
| H | 5.94216600  | -1.26454500 | -1.67755800 |
| H | 6.45289200  | -0.37009900 | 0.57638800  |
| H | 4.91692900  | -0.84175400 | 2.46600800  |
| H | 2.88221300  | -2.20238900 | 2.09711000  |
| C | 2.63868300  | 1.03134600  | -1.55357200 |
| C | 2.23894500  | 2.28475200  | -0.82556200 |
| H | 2.95956700  | 1.25115200  | -2.57316100 |

|   |             |             |             |
|---|-------------|-------------|-------------|
| H | 3.46222800  | 0.53420000  | -1.02783100 |
| C | 1.47908700  | 3.26525600  | -1.46529900 |
| C | 1.00150000  | 4.36136200  | -0.75809800 |
| C | 1.28139200  | 4.49153500  | 0.60034500  |
| C | 2.05625900  | 3.53155200  | 1.24160300  |
| C | 2.53573300  | 2.43672100  | 0.52817900  |
| H | 1.24889600  | 3.15728800  | -2.52115300 |
| H | 0.41361400  | 5.11895500  | -1.26575100 |
| H | 0.91091800  | 5.34967500  | 1.15135200  |
| H | 3.14573800  | 1.68728000  | 1.02600900  |
| H | 2.29744400  | 3.64108900  | 2.29398000  |
| O | -2.79098200 | 1.08283900  | 1.34566600  |
| H | -1.18780300 | 2.07404500  | 2.11757500  |
| H | -1.76157300 | 0.68880700  | 3.09988800  |
| C | -3.53060500 | 0.04414100  | 1.41855300  |
| C | -4.54396400 | -0.19696800 | 0.46791300  |
| H | -3.39357900 | -0.63128000 | 2.26228400  |
| C | -5.41853200 | -1.27668600 | 0.70104900  |
| C | -6.41720200 | -1.55303500 | -0.21155600 |
| C | -6.53807000 | -0.76392400 | -1.35465400 |
| C | -5.66640200 | 0.30183000  | -1.59780600 |
| C | -4.66676500 | 0.59117800  | -0.69468000 |
| H | -5.30442600 | -1.87988300 | 1.59595800  |
| H | -7.09957100 | -2.37749500 | -0.04317600 |
| H | -7.32034900 | -0.98445300 | -2.07322800 |
| H | -5.77400400 | 0.89318300  | -2.49928300 |
| H | -3.96624900 | 1.39843400  | -0.87069200 |

Gal -4B\_Toluene

Charge=+1, Multiplicity=+1

|   |             |            |             |
|---|-------------|------------|-------------|
| O | 0.46802600  | 1.82450800 | -1.56965200 |
| C | 0.18235500  | 0.68287100 | -0.80969200 |
| C | 0.78635100  | 2.66587400 | -0.45281400 |
| O | -0.82796300 | 1.11944400 | 0.10572400  |
| C | 1.92974300  | 1.92187900 | 0.22599500  |
| C | 1.48993000  | 0.45296900 | -0.01868900 |
| H | 1.97029700  | 2.11383700 | 1.30597500  |
| O | 3.12681200  | 2.30081500 | -0.39213300 |

|   |             |             |             |
|---|-------------|-------------|-------------|
| O | 1.35871000  | -0.21531600 | 1.19920900  |
| H | 2.21294900  | -0.04309300 | -0.67534700 |
| H | -0.19895600 | -0.13184000 | -1.41822700 |
| C | -0.48959100 | 2.47633100  | 0.38595700  |
| C | -1.63290100 | 3.35433300  | -0.11954700 |
| H | -0.33625100 | 2.60097400  | 1.45934800  |
| H | 1.01090600  | 3.67993300  | -0.77612500 |
| C | 1.36823000  | -1.63411100 | 1.09257000  |
| C | 0.12411200  | -2.18390400 | 0.45060000  |
| H | 1.45993300  | -1.99086800 | 2.12087300  |
| H | 2.26041700  | -1.95466700 | 0.54081800  |
| C | 0.18237100  | -2.84810700 | -0.77231000 |
| C | -0.97921100 | -3.31920400 | -1.37855900 |
| C | -2.20955200 | -3.12647700 | -0.76148100 |
| C | -2.27506200 | -2.46850800 | 0.46472900  |
| C | -1.11548400 | -2.00116500 | 1.06533700  |
| H | 1.14500600  | -2.99551600 | -1.25417800 |
| H | -0.92168400 | -3.83879600 | -2.32928300 |
| H | -3.11610800 | -3.49707100 | -1.22919600 |
| H | -3.23270900 | -2.32671900 | 0.95485400  |
| H | -1.16536000 | -1.48058800 | 2.01654500  |
| C | 4.30306600  | 1.91858500  | 0.31080300  |
| C | 4.64136000  | 0.45559600  | 0.19173400  |
| H | 4.20799500  | 2.19627300  | 1.36910400  |
| H | 5.09750100  | 2.52634600  | -0.12882900 |
| C | 4.71902300  | -0.35406000 | 1.32080000  |
| C | 5.03191500  | -1.70541800 | 1.20312100  |
| C | 5.25881400  | -2.25917700 | -0.05060000 |
| C | 5.18144900  | -1.45575700 | -1.18638300 |
| C | 4.88067100  | -0.10608400 | -1.06426200 |
| H | 4.52748900  | 0.07318900  | 2.30065300  |
| H | 5.09230200  | -2.32567600 | 2.09132400  |
| H | 5.50080300  | -3.31254500 | -0.14508500 |
| H | 4.82227100  | 0.52155000  | -1.94869800 |
| H | 5.36649500  | -1.88224800 | -2.16682200 |
| O | -2.85960800 | 2.66283400  | 0.19212000  |
| H | -1.57345500 | 3.48826400  | -1.20202000 |
| H | -1.68653700 | 4.31498900  | 0.38656400  |

|   |             |             |             |
|---|-------------|-------------|-------------|
| C | -3.12334600 | 1.64826800  | -0.54122100 |
| C | -4.10502700 | 0.70399000  | -0.16789600 |
| H | -2.64378800 | 1.57788300  | -1.51637600 |
| C | -4.69655700 | 0.71523900  | 1.11035800  |
| C | -5.65518500 | -0.22695300 | 1.41509700  |
| C | -6.03060700 | -1.17367000 | 0.45637800  |
| C | -5.44398300 | -1.19477100 | -0.80666800 |
| C | -4.47235700 | -0.26361400 | -1.12104400 |
| H | -4.38938600 | 1.45773600  | 1.83741300  |
| H | -6.11931400 | -0.23599100 | 2.39411200  |
| H | -6.78882000 | -1.90881700 | 0.70443600  |
| H | -5.74107900 | -1.94092400 | -1.53380500 |
| H | -3.99189100 | -0.27364100 | -2.09403500 |

Gal -4B\_Et2O

Charge=+1, Multiplicity=+1

|   |             |             |             |
|---|-------------|-------------|-------------|
| O | 0.40493500  | 0.40939600  | -0.75038600 |
| C | -0.45849600 | -0.51556800 | -0.15900600 |
| C | 1.54282100  | 0.09183000  | 0.06562700  |
| O | -0.40976200 | -0.19884900 | 1.24220500  |
| C | 1.73776600  | -1.41144800 | -0.20127200 |
| C | 0.27266400  | -1.85323400 | -0.39144700 |
| H | 2.16977900  | -1.92718000 | 0.66467900  |
| O | 2.46975900  | -1.69387500 | -1.36350700 |
| O | -0.05095600 | -2.89405900 | 0.48220600  |
| H | 0.13243300  | -2.14748000 | -1.43969000 |
| H | -1.47855000 | -0.41514100 | -0.51813100 |
| C | 0.93519300  | 0.22020500  | 1.46993100  |
| C | 0.89520800  | 1.61966000  | 2.07467800  |
| H | 1.42180400  | -0.44373200 | 2.19097100  |
| H | 2.37953500  | 0.74352800  | -0.16440300 |
| C | -1.19173500 | -3.65240600 | 0.08970500  |
| C | -2.46115700 | -2.84477600 | 0.07636100  |
| H | -1.25203100 | -4.46234000 | 0.81945500  |
| H | -1.01497400 | -4.09207200 | -0.90029700 |
| C | -3.11401700 | -2.56353300 | -1.12195900 |
| C | -4.24280700 | -1.74940000 | -1.14053900 |
| C | -4.72859600 | -1.21154200 | 0.04532900  |

|   |             |             |             |
|---|-------------|-------------|-------------|
| C | -4.09033300 | -1.49923100 | 1.24955300  |
| C | -2.96494100 | -2.31196500 | 1.26420600  |
| H | -2.72981700 | -2.97687800 | -2.05022400 |
| H | -4.74015000 | -1.53512000 | -2.08060800 |
| H | -5.60888400 | -0.57737300 | 0.03360600  |
| H | -4.47531100 | -1.09208500 | 2.17908300  |
| H | -2.46046100 | -2.52708400 | 2.20099700  |
| C | 3.87014100  | -1.85037700 | -1.14190700 |
| C | 4.53094600  | -0.59343600 | -0.64647300 |
| H | 4.27472900  | -2.14726000 | -2.11107000 |
| H | 4.03577400  | -2.67034200 | -0.43102000 |
| C | 4.71347500  | 0.48807700  | -1.51015100 |
| C | 5.23246200  | 1.68683200  | -1.03884200 |
| C | 5.58051800  | 1.81669400  | 0.30395600  |
| C | 5.41762000  | 0.73988800  | 1.16793400  |
| C | 4.89443700  | -0.45919800 | 0.69202400  |
| H | 4.43346800  | 0.38955500  | -2.55482800 |
| H | 5.37075500  | 2.52137300  | -1.71827300 |
| H | 5.98936900  | 2.75220600  | 0.67098100  |
| H | 4.76655800  | -1.29987500 | 1.36830100  |
| H | 5.70128700  | 0.83109400  | 2.21126900  |
| O | 0.00512700  | 2.40951400  | 1.26566800  |
| H | 1.86344700  | 2.11489900  | 2.04723300  |
| H | 0.51298100  | 1.59131200  | 3.09827700  |
| C | -1.23798400 | 2.11972600  | 1.36564400  |
| C | -2.15135600 | 2.47212200  | 0.34827900  |
| H | -1.59154600 | 1.65554000  | 2.28479400  |
| C | -3.51980200 | 2.24422900  | 0.58735700  |
| C | -4.44143200 | 2.54621700  | -0.39593900 |
| C | -4.00148800 | 3.06301100  | -1.61305700 |
| C | -2.64286000 | 3.28012800  | -1.86111500 |
| C | -1.71183400 | 2.98647600  | -0.88816500 |
| H | -3.83919600 | 1.83053400  | 1.53794400  |
| H | -5.49791200 | 2.37884100  | -0.22490400 |
| H | -4.72621700 | 3.29537900  | -2.38611700 |
| H | -2.32406500 | 3.67263300  | -2.81939600 |
| H | -0.65210700 | 3.12616700  | -1.06238500 |

Gal-4B\_CHCl<sub>3</sub>

Charge=+1, Multiplicity=+1

|   |             |             |             |
|---|-------------|-------------|-------------|
| O | -0.41075500 | -0.42558900 | -0.75917200 |
| C | 0.45905200  | 0.51152800  | -0.19652200 |
| C | -1.54133200 | -0.08645400 | 0.05855300  |
| O | 0.42123500  | 0.22826700  | 1.21168700  |
| C | -1.73608100 | 1.40958300  | -0.24545900 |
| C | -0.27157200 | 1.84456600  | -0.45588500 |
| H | -2.16226800 | 1.94844200  | 0.60916500  |
| O | -2.47520900 | 1.66120900  | -1.41059500 |
| O | 0.05664800  | 2.90652900  | 0.39016900  |
| H | -0.13563500 | 2.11400200  | -1.51146100 |
| H | 1.47568100  | 0.40047500  | -0.56178900 |
| C | -0.92247200 | -0.18263500 | 1.46035700  |
| C | -0.87999800 | -1.56831900 | 2.09576100  |
| H | -1.40202000 | 0.49870000  | 2.16983000  |
| H | -2.38088300 | -0.74237300 | -0.14778900 |
| C | 1.21235100  | 3.63691800  | -0.01003900 |
| C | 2.47735200  | 2.82424500  | 0.05084400  |
| H | 1.26031000  | 4.48152000  | 0.68038500  |
| H | 1.06498700  | 4.02871700  | -1.02474500 |
| C | 2.93702800  | 2.33728000  | 1.27544500  |
| C | 4.06438000  | 1.52925400  | 1.33346200  |
| C | 4.74928100  | 1.20142300  | 0.16574300  |
| C | 4.30567500  | 1.69107400  | -1.05708300 |
| C | 3.17392400  | 2.49961700  | -1.11133600 |
| H | 2.39724900  | 2.58612900  | 2.18371000  |
| H | 4.41466600  | 1.15698700  | 2.29096100  |
| H | 5.63247500  | 0.57281800  | 0.21149800  |
| H | 4.83820300  | 1.44319600  | -1.96924500 |
| H | 2.82161200  | 2.87514900  | -2.06794300 |
| C | -3.87385200 | 1.82741800  | -1.18446600 |
| C | -4.53414700 | 0.58807800  | -0.64587200 |
| H | -4.28446800 | 2.09504100  | -2.15960000 |
| H | -4.03288900 | 2.66924300  | -0.49819800 |
| C | -4.72431600 | -0.51962200 | -1.47399700 |
| C | -5.24221500 | -1.70204200 | -0.96189300 |
| C | -5.58149800 | -1.78904100 | 0.38663200  |



|   |             |             |             |
|---|-------------|-------------|-------------|
| C | -5.41120500 | -0.68589300 | 1.21523100  |
| C | -4.88957200 | 0.49682800  | 0.69839800  |
| H | -4.45057600 | -0.45459400 | -2.52298100 |
| H | -5.38614100 | -2.55726400 | -1.61386400 |
| H | -5.98856400 | -2.71210600 | 0.78578200  |
| H | -4.75524000 | 1.35792600  | 1.34718500  |
| H | -5.68744700 | -0.74374000 | 2.26293700  |
| O | -0.00205200 | -2.37920600 | 1.29412700  |
| H | -1.85023400 | -2.06026900 | 2.08968600  |
| H | -0.48638400 | -1.51896600 | 3.11413500  |
| C | 1.24300800  | -2.09036200 | 1.37048200  |
| C | 2.14052500  | -2.46606200 | 0.34725800  |
| H | 1.61015800  | -1.60625200 | 2.27367400  |
| C | 3.51189300  | -2.22521900 | 0.55540700  |
| C | 4.41647300  | -2.54452100 | -0.43848800 |
| C | 3.95705400  | -3.09392000 | -1.63389700 |
| C | 2.59545700  | -3.32550800 | -1.85069500 |
| C | 1.68114900  | -3.01267200 | -0.86799400 |
| H | 3.84672700  | -1.78501500 | 1.48874200  |
| H | 5.47477600  | -2.36483900 | -0.29305300 |
| H | 4.66870600  | -3.34029400 | -2.41474500 |
| H | 2.26097900  | -3.74331500 | -2.79277400 |
| H | 0.61920300  | -3.16225300 | -1.01892600 |

Gal-4B\_DCM

Charge=+1, Multiplicity=+1

|   |             |             |             |
|---|-------------|-------------|-------------|
| O | -1.27192800 | -0.23713800 | -0.77225100 |
| C | -1.02580100 | -1.50918400 | -0.24712900 |
| C | -0.25617600 | 0.43183700  | -0.00532800 |
| O | -1.16130400 | -1.33356800 | 1.16504900  |
| C | 1.01774800  | -0.30775600 | -0.43181600 |
| C | 0.44995500  | -1.74351600 | -0.59540800 |
| H | 1.78233500  | -0.28646000 | 0.34972900  |
| O | 1.53790800  | 0.14663000  | -1.65454500 |
| O | 0.99462600  | -2.72717700 | 0.23385100  |
| H | 0.52664200  | -2.02603200 | -1.65347500 |
| H | -1.74384900 | -2.24873500 | -0.59159900 |
| C | -0.59759500 | -0.04694700 | 1.41662400  |

|   |             |             |             |
|---|-------------|-------------|-------------|
| C | -1.60295500 | 0.78723000  | 2.18351900  |
| H | 0.29793800  | -0.13551100 | 2.04064900  |
| H | -0.28275400 | 1.50384000  | -0.17560400 |
| C | 2.20967100  | -3.29356100 | -0.23777900 |
| C | 3.41077800  | -2.40263400 | -0.05214200 |
| H | 2.10758600  | -3.57011300 | -1.29489100 |
| H | 2.33316800  | -4.21257600 | 0.34117900  |
| C | 4.24681000  | -2.10065500 | -1.12287000 |
| C | 5.36571600  | -1.29100800 | -0.94232400 |
| C | 5.64826400  | -0.76486200 | 0.31227500  |
| C | 4.81288500  | -1.05790300 | 1.38851600  |
| C | 3.70633300  | -1.87709800 | 1.20775200  |
| H | 4.01787200  | -2.49502300 | -2.10858700 |
| H | 6.00866200  | -1.06273000 | -1.78597100 |
| H | 6.51434200  | -0.12691900 | 0.45342200  |
| H | 5.03052200  | -0.65160500 | 2.37098100  |
| H | 3.05726500  | -2.10833300 | 2.04730800  |
| C | 2.58446700  | 1.10721900  | -1.50515800 |
| C | 2.14025800  | 2.34812100  | -0.78187300 |
| H | 2.90062700  | 1.33880700  | -2.52391900 |
| H | 3.42528000  | 0.64176200  | -0.97761800 |
| C | 1.34027100  | 3.29423000  | -1.42504300 |
| C | 0.84431100  | 4.38928400  | -0.72894000 |
| C | 1.14585100  | 4.55239400  | 0.62141700  |
| C | 1.95482600  | 3.62372200  | 1.26669600  |
| C | 2.45055600  | 2.52845200  | 0.56515900  |
| H | 1.09589500  | 3.16162800  | -2.47499900 |
| H | 0.22287000  | 5.11852300  | -1.23819900 |
| H | 0.75781200  | 5.40729800  | 1.16526500  |
| H | 3.08287200  | 1.80193500  | 1.06878300  |
| H | 2.20207200  | 3.75258800  | 2.31534400  |
| O | -2.81456900 | 0.87646700  | 1.40214500  |
| H | -1.25931600 | 1.81053200  | 2.31948400  |
| H | -1.83687900 | 0.33234700  | 3.14831500  |
| C | -3.58709400 | -0.13687400 | 1.39586500  |
| C | -4.61694900 | -0.25948200 | 0.43998200  |
| H | -3.45056600 | -0.89771100 | 2.16315900  |
| C | -5.49121800 | -1.35741200 | 0.55770300  |

|   |             |             |             |
|---|-------------|-------------|-------------|
| C | -6.50380400 | -1.52212700 | -0.36756000 |
| C | -6.64028600 | -0.60228300 | -1.40571000 |
| C | -5.77108000 | 0.48619300  | -1.53173700 |
| C | -4.75713100 | 0.66372800  | -0.61624800 |
| H | -5.36454500 | -2.06318200 | 1.37193200  |
| H | -7.18483200 | -2.36082500 | -0.28915700 |
| H | -7.43361300 | -0.73511300 | -2.13353500 |
| H | -5.89300100 | 1.18338400  | -2.35200000 |
| H | -4.06393200 | 1.49188100  | -0.70064600 |

Gal-4B\_ACN

Charge=+1, Multiplicity=+1

|   |             |             |             |
|---|-------------|-------------|-------------|
| O | -1.25377600 | -0.33124500 | -0.74496200 |
| C | -0.96124500 | -1.59927400 | -0.23094000 |
| C | -0.26209800 | 0.36700500  | 0.02813300  |
| O | -1.10206300 | -1.44270400 | 1.18059300  |
| C | 1.03649500  | -0.32021700 | -0.40937400 |
| C | 0.52191200  | -1.77424600 | -0.58549400 |
| H | 1.80259600  | -0.27678200 | 0.36953400  |
| O | 1.53632200  | 0.16320700  | -1.63074900 |
| O | 1.10849200  | -2.74470900 | 0.23180300  |
| H | 0.60577900  | -2.04469600 | -1.64609600 |
| H | -1.65171000 | -2.36084800 | -0.58357800 |
| C | -0.58204500 | -0.13940100 | 1.44609100  |
| C | -1.60900300 | 0.65373300  | 2.22442800  |
| H | 0.31830300  | -0.20426500 | 2.06600400  |
| H | -0.32977300 | 1.43903800  | -0.12994100 |
| C | 2.33876600  | -3.26319000 | -0.25475400 |
| C | 3.50840200  | -2.32890400 | -0.07904400 |
| H | 2.23565200  | -3.53951600 | -1.31175100 |
| H | 2.50314000  | -4.17915000 | 0.31895100  |
| C | 4.32736700  | -2.00291000 | -1.15616600 |
| C | 5.41774600  | -1.15296700 | -0.98618800 |
| C | 5.68835700  | -0.61047600 | 0.26428800  |
| C | 4.86960400  | -0.92706800 | 1.34668900  |
| C | 3.79216700  | -1.78660300 | 1.17645800  |
| H | 4.10685300  | -2.41013100 | -2.13864100 |
| H | 6.04678000  | -0.90552100 | -1.83494500 |

|   |             |             |             |
|---|-------------|-------------|-------------|
| H | 6.53092600  | 0.06000300  | 0.39697800  |
| H | 5.07581600  | -0.50586300 | 2.32526900  |
| H | 3.15507000  | -2.03370000 | 2.02058400  |
| C | 2.54597200  | 1.16174900  | -1.47671300 |
| C | 2.05078500  | 2.38670400  | -0.75944800 |
| H | 2.86010700  | 1.40317500  | -2.49392800 |
| H | 3.39993600  | 0.72856000  | -0.94284400 |
| C | 1.21203700  | 3.29463200  | -1.40852300 |
| C | 0.66821600  | 4.37054100  | -0.71835100 |
| C | 0.96034600  | 4.55262500  | 0.63178100  |
| C | 1.80742800  | 3.66264000  | 1.28262300  |
| C | 2.35099700  | 2.58637300  | 0.58707900  |
| H | 0.97432800  | 3.14606000  | -2.45792900 |
| H | 0.01496300  | 5.06870600  | -1.23135800 |
| H | 0.53239700  | 5.39061500  | 1.17198200  |
| H | 3.00981500  | 1.88820500  | 1.09661600  |
| H | 2.04383900  | 3.80417900  | 2.33207600  |
| O | -2.80938300 | 0.76632900  | 1.42659800  |
| H | -1.27721400 | 1.67389000  | 2.40557600  |
| H | -1.85584000 | 0.16073200  | 3.16649000  |
| C | -3.59018100 | -0.23803300 | 1.38060100  |
| C | -4.62302100 | -0.30949100 | 0.42220500  |
| H | -3.45484900 | -1.03466700 | 2.11127200  |
| C | -5.49706800 | -1.41154800 | 0.48418800  |
| C | -6.51326800 | -1.52630400 | -0.44508500 |
| C | -6.65377200 | -0.55201300 | -1.43143800 |
| C | -5.78493500 | 0.54205000  | -1.50154900 |
| C | -4.76750700 | 0.66980700  | -0.58159400 |
| H | -5.36693900 | -2.15958300 | 1.25885200  |
| H | -7.19392200 | -2.36813400 | -0.40904000 |
| H | -7.45021900 | -0.64507100 | -2.16197500 |
| H | -5.91078500 | 1.28325500  | -2.28160200 |
| H | -4.07652600 | 1.50319000  | -0.62223900 |

Gal-4B\_DMSO

Charge=+1, Multiplicity=+1

|   |             |             |             |
|---|-------------|-------------|-------------|
| O | -1.25141600 | -0.34044100 | -0.74328300 |
| C | -0.95422400 | -1.60789800 | -0.23019100 |

|   |             |             |             |
|---|-------------|-------------|-------------|
| C | -0.26235000 | 0.36083200  | 0.03050200  |
| O | -1.09567400 | -1.45310200 | 1.18122100  |
| C | 1.03874600  | -0.32116800 | -0.40771700 |
| C | 0.52959300  | -1.77692300 | -0.58505000 |
| H | 1.80479000  | -0.27547400 | 0.37108600  |
| O | 1.53670900  | 0.16501500  | -1.62886400 |
| O | 1.11996900  | -2.74583000 | 0.23140900  |
| H | 0.61448400  | -2.04627700 | -1.64584900 |
| H | -1.64176200 | -2.37170300 | -0.58370400 |
| C | -0.58033400 | -0.14809200 | 1.44803800  |
| C | -1.60961900 | 0.64071700  | 2.22737100  |
| H | 0.32029100  | -0.21026400 | 2.06779600  |
| H | -0.33415700 | 1.43274600  | -0.12652800 |
| C | 2.35177500  | -3.25982400 | -0.25597800 |
| C | 3.51819400  | -2.32130200 | -0.08130500 |
| H | 2.24888300  | -3.53668700 | -1.31284900 |
| H | 2.51994700  | -4.17507700 | 0.31775400  |
| C | 4.33525900  | -1.99277600 | -1.15912500 |
| C | 5.42286200  | -1.13906300 | -0.99017900 |
| C | 5.69250700  | -0.59529900 | 0.25997300  |
| C | 4.87554900  | -0.91430300 | 1.34303400  |
| C | 3.80095600  | -1.77760400 | 1.17383200  |
| H | 4.11541500  | -2.40104200 | -2.14132600 |
| H | 6.05039300  | -0.88964500 | -1.83948000 |
| H | 6.53282800  | 0.07816300  | 0.39187200  |
| H | 5.08078100  | -0.49186400 | 2.32128500  |
| H | 3.16518600  | -2.02637100 | 2.01846600  |
| C | 2.54248000  | 1.16739500  | -1.47428900 |
| C | 2.04225400  | 2.39037200  | -0.75717000 |
| H | 2.85614600  | 1.41013200  | -2.49134600 |
| H | 3.39785200  | 0.73740700  | -0.94008300 |
| C | 1.20056000  | 3.29525300  | -1.40670800 |
| C | 0.65183800  | 4.36875100  | -0.71663800 |
| C | 0.94194300  | 4.55141700  | 0.63386000  |
| C | 1.79195100  | 3.66454200  | 1.28514400  |
| C | 2.34049500  | 2.59074800  | 0.58969300  |
| H | 0.96434600  | 3.14611500  | -2.45638100 |
| H | -0.00385300 | 5.06441700  | -1.22993800 |

|   |             |             |             |
|---|-------------|-------------|-------------|
| H | 0.50987700  | 5.38727900  | 1.17408600  |
| H | 3.00128300  | 1.89486300  | 1.09977000  |
| H | 2.02649600  | 3.80633400  | 2.33497900  |
| O | -2.80897300 | 0.75553700  | 1.42807200  |
| H | -1.27924900 | 1.66051000  | 2.41312200  |
| H | -1.85758100 | 0.14378700  | 3.16703200  |
| C | -3.59035100 | -0.24802600 | 1.37810500  |
| C | -4.62410100 | -0.31437200 | 0.42026400  |
| H | -3.45464500 | -1.04831700 | 2.10471900  |
| C | -5.49744600 | -1.41723500 | 0.47687200  |
| C | -6.51458200 | -1.52730300 | -0.45197300 |
| C | -6.65678100 | -0.54740600 | -1.43248300 |
| C | -5.78874600 | 0.54766800  | -1.49713100 |
| C | -4.77038500 | 0.67074300  | -0.57756300 |
| H | -5.36596500 | -2.16954300 | 1.24713700  |
| H | -7.19466200 | -2.36976200 | -0.42002700 |
| H | -7.45399000 | -0.63668800 | -2.16266100 |
| H | -5.91608100 | 1.29341300  | -2.27260400 |
| H | -4.08024900 | 1.50504500  | -0.61388200 |

Gal-4B\_Water

Charge=+1, Multiplicity=+1

|   |             |             |             |
|---|-------------|-------------|-------------|
| O | -1.24887800 | -0.35271600 | -0.74201300 |
| C | -0.94555000 | -1.61948800 | -0.23045100 |
| C | -0.26298700 | 0.35230600  | 0.03251800  |
| O | -1.08756100 | -1.46724400 | 1.18088400  |
| C | 1.04109800  | -0.32275300 | -0.40731300 |
| C | 0.53907900  | -1.78079400 | -0.58588300 |
| H | 1.80748700  | -0.27393700 | 0.37087800  |
| O | 1.53581900  | 0.16710600  | -1.62848400 |
| O | 1.13456800  | -2.74743600 | 0.22970700  |
| H | 0.62519500  | -2.04902600 | -1.64685600 |
| H | -1.62935700 | -2.38611000 | -0.58507900 |
| C | -0.57795200 | -0.16019200 | 1.44953600  |
| C | -1.60978700 | 0.62298900  | 2.23075400  |
| H | 0.32330300  | -0.21926400 | 2.06865200  |
| H | -0.34017500 | 1.42408500  | -0.12286900 |
| C | 2.36867500  | -3.25504800 | -0.25845000 |

|   |             |             |             |
|---|-------------|-------------|-------------|
| C | 3.53065500  | -2.31095100 | -0.08386800 |
| H | 2.26672200  | -3.53190700 | -1.31540700 |
| H | 2.54165100  | -4.16977200 | 0.31471400  |
| C | 4.34669100  | -1.97963000 | -1.16164600 |
| C | 5.43031900  | -1.12079800 | -0.99299900 |
| C | 5.69695900  | -0.57473900 | 0.25682200  |
| C | 4.88097600  | -0.89651200 | 1.33981000  |
| C | 3.81040500  | -1.76487200 | 1.17092500  |
| H | 4.12910200  | -2.38974400 | -2.14358900 |
| H | 6.05699000  | -0.86916200 | -1.84228500 |
| H | 6.53402600  | 0.10281900  | 0.38846700  |
| H | 5.08357600  | -0.47201500 | 2.31771100  |
| H | 3.17523500  | -2.01541800 | 2.01547300  |
| C | 2.53735500  | 1.17373800  | -1.47364700 |
| C | 2.03207100  | 2.39387800  | -0.75528900 |
| H | 2.84942300  | 1.41865600  | -2.49067900 |
| H | 3.39482700  | 0.74701800  | -0.94018400 |
| C | 1.18655100  | 3.29586100  | -1.40391400 |
| C | 0.63295900  | 4.36608200  | -0.71262200 |
| C | 0.92192400  | 4.54826100  | 0.63819200  |
| C | 1.77566700  | 3.66430300  | 1.28855900  |
| C | 2.32918700  | 2.59388100  | 0.59187900  |
| H | 0.95111900  | 3.14695000  | -2.45380200 |
| H | -0.02588900 | 5.05934800  | -1.22512800 |
| H | 0.48571000  | 5.38126300  | 1.17950000  |
| H | 2.99248300  | 1.90003200  | 1.10144000  |
| H | 2.00889800  | 3.80543300  | 2.33876800  |
| O | -2.80815900 | 0.74126400  | 1.43010300  |
| H | -1.28098400 | 1.64216900  | 2.42258700  |
| H | -1.85894300 | 0.12079700  | 3.16725700  |
| C | -3.59036300 | -0.26115800 | 1.37463900  |
| C | -4.62594600 | -0.31993100 | 0.41816600  |
| H | -3.45362400 | -1.06691200 | 2.09500000  |
| C | -5.49841600 | -1.42376600 | 0.46731000  |
| C | -6.51754500 | -1.52665700 | -0.46023100 |
| C | -6.66263700 | -0.53851700 | -1.43195500 |
| C | -5.79556400 | 0.55777400  | -1.48904400 |
| C | -4.77524300 | 0.67371500  | -0.57069900 |

|   |             |             |             |
|---|-------------|-------------|-------------|
| H | -5.36466900 | -2.18242300 | 1.23089600  |
| H | -7.19694000 | -2.36985800 | -0.43391400 |
| H | -7.46145300 | -0.62206000 | -2.16105200 |
| H | -5.92534700 | 1.31020000  | -2.25762600 |
| H | -4.08618100 | 1.50916100  | -0.60108100 |

Gal-6B\_Dioxane

Charge=+1, Multiplicity=+1

|   |             |             |             |
|---|-------------|-------------|-------------|
| C | -0.75659500 | -2.34836600 | -0.36876400 |
| O | -2.11358600 | -2.10510300 | -0.70944800 |
| C | -2.50741000 | -1.16159600 | 0.26339600  |
| C | -0.04203500 | -1.13085100 | -0.96825600 |
| H | -0.42732100 | -3.26990600 | -0.85081600 |
| C | -0.86376700 | -2.46066500 | 1.15486400  |
| C | -0.41158400 | 0.16919600  | -0.26582500 |
| H | -0.36664900 | -1.07474900 | -2.00623000 |
| O | 1.40291300  | -1.20198300 | -1.08522700 |
| C | -1.94586400 | 0.22268500  | -0.09522500 |
| O | 0.27713800  | 0.20917300  | 0.95883100  |
| H | -0.11850300 | 1.00674100  | -0.90662200 |
| O | -2.47682400 | 0.67259400  | -1.31635200 |
| H | -2.16643400 | 0.91754100  | 0.72500900  |
| O | -1.95533200 | -1.61091300 | 1.47920400  |
| H | -3.59528000 | -1.15418300 | 0.31652500  |
| H | 0.01276300  | -2.13442400 | 1.71436600  |
| H | -1.10816700 | -3.49103600 | 1.42833900  |
| C | 2.15161200  | -1.39895900 | -0.07280800 |
| C | 3.55368700  | -1.27157500 | -0.18029500 |
| H | 1.70314200  | -1.71142000 | 0.86433800  |
| C | 4.16487500  | -0.77480300 | -1.34822400 |
| C | 5.53891600  | -0.67915700 | -1.39900600 |
| C | 6.30468700  | -1.07283500 | -0.29906700 |
| C | 5.70681400  | -1.55871700 | 0.86311300  |
| C | 4.33139900  | -1.65463600 | 0.92981700  |
| H | 3.55104600  | -0.46714700 | -2.18609100 |
| H | 6.02577400  | -0.29505100 | -2.28747300 |
| H | 7.38557500  | -0.99467700 | -0.34935000 |
| H | 6.31767900  | -1.85645000 | 1.70686800  |



|   |             |             |             |
|---|-------------|-------------|-------------|
| H | 3.84743200  | -2.02415600 | 1.82828700  |
| C | 0.63524700  | 1.52827000  | 1.40196600  |
| C | 1.95598100  | 1.95472300  | 0.83303000  |
| H | 0.68237300  | 1.46300900  | 2.48978500  |
| H | -0.16215200 | 2.23108200  | 1.13746200  |
| C | 3.13388000  | 1.63990800  | 1.51173700  |
| C | 4.37145300  | 1.96377600  | 0.97167500  |
| C | 4.44412100  | 2.60282100  | -0.26137000 |
| C | 3.27666400  | 2.93493700  | -0.94043800 |
| C | 2.03905700  | 2.62046100  | -0.39096300 |
| H | 3.07724800  | 1.14423000  | 2.47683000  |
| H | 5.27934000  | 1.72108600  | 1.51349000  |
| H | 5.40962300  | 2.85797700  | -0.68491300 |
| H | 3.32904900  | 3.45479700  | -1.89112800 |
| H | 1.13225700  | 2.91817000  | -0.90968700 |
| C | -3.53763800 | 1.62210400  | -1.20205500 |
| C | -4.77028100 | 1.05204600  | -0.56025400 |
| H | -3.18695700 | 2.49814000  | -0.64016800 |
| H | -3.73910700 | 1.93272500  | -2.22897800 |
| C | -5.53222800 | 0.09780700  | -1.23766300 |
| C | -6.63404900 | -0.48443800 | -0.62693500 |
| C | -6.98860800 | -0.11742300 | 0.66920700  |
| C | -6.24189500 | 0.83784800  | 1.34706700  |
| C | -5.13699400 | 1.41925700  | 0.73220100  |
| H | -4.55553300 | 2.16762400  | 1.26354600  |
| H | -7.84980600 | -0.57294800 | 1.14622400  |
| H | -6.51717700 | 1.13073600  | 2.35458000  |
| H | -5.25074800 | -0.19425800 | -2.24498300 |
| H | -7.22060800 | -1.22451500 | -1.16083400 |

Gal-6B\_Toluene

Charge=+1, Multiplicity=+1

|   |             |             |             |
|---|-------------|-------------|-------------|
| C | -2.04174500 | -2.25030600 | -1.34521700 |
| O | -3.35430000 | -1.72453300 | -1.47097400 |
| C | -3.76248300 | -1.62596800 | -0.12442000 |
| C | -1.20556300 | -1.04039100 | -0.94520300 |
| H | -1.72086000 | -2.65131500 | -2.30679800 |
| C | -2.23159200 | -3.31169000 | -0.26562200 |

|   |             |             |             |
|---|-------------|-------------|-------------|
| C | -1.57089300 | -0.49529800 | 0.42917500  |
| H | -1.37675900 | -0.26597700 | -1.69589600 |
| O | 0.21179800  | -1.38038800 | -0.98199200 |
| C | -3.11229500 | -0.39342600 | 0.51794000  |
| O | -1.05520000 | -1.34422700 | 1.42253200  |
| H | -1.14196200 | 0.50906900  | 0.52579700  |
| O | -3.63431000 | 0.71079600  | -0.17784600 |
| H | -3.38312700 | -0.35752000 | 1.58215600  |
| O | -3.32800600 | -2.80615300 | 0.49875300  |
| H | -4.85004100 | -1.55108900 | -0.09640200 |
| H | -1.36133100 | -3.43958100 | 0.37783200  |
| H | -2.51846200 | -4.26583700 | -0.71420400 |
| C | 1.04227700  | -0.42094300 | -1.09348200 |
| C | 2.42806100  | -0.64633900 | -1.17348000 |
| H | 0.64923900  | 0.59744100  | -1.16658200 |
| C | 2.98464600  | -1.93694500 | -1.05207400 |
| C | 4.34666200  | -2.09464400 | -1.17680100 |
| C | 5.15693100  | -0.98056100 | -1.42284700 |
| C | 4.61659500  | 0.29805400  | -1.53545500 |
| C | 3.25252400  | 0.47258200  | -1.40271000 |
| H | 2.33703300  | -2.78527300 | -0.86432200 |
| H | 4.79251500  | -3.07811800 | -1.08746400 |
| H | 6.22869800  | -1.11596900 | -1.52391600 |
| H | 5.26148900  | 1.14870300  | -1.71998700 |
| H | 2.80762100  | 1.45910800  | -1.48121200 |
| C | -0.48904200 | -0.67159000 | 2.54518300  |
| C | 0.91359600  | -0.19792900 | 2.28058400  |
| H | -0.49740900 | -1.40765100 | 3.35085400  |
| H | -1.12858000 | 0.16586500  | 2.84951200  |
| C | 1.17862500  | 1.14065000  | 1.98841600  |
| C | 2.48111400  | 1.57479500  | 1.76284600  |
| C | 3.53371300  | 0.67069700  | 1.83122000  |
| C | 3.27931000  | -0.66994100 | 2.11327700  |
| C | 1.97788800  | -1.10041800 | 2.33362200  |
| H | 0.36284000  | 1.85593400  | 1.95846200  |
| H | 2.67113600  | 2.62128000  | 1.54756500  |
| H | 4.55244400  | 1.00805700  | 1.67345100  |
| H | 4.10060500  | -1.37580300 | 2.17536600  |

|   |             |             |             |
|---|-------------|-------------|-------------|
| H | 1.78293100  | -2.14315300 | 2.56674400  |
| C | -3.36545300 | 1.98579900  | 0.37449800  |
| C | -2.11270100 | 2.62035500  | -0.18038100 |
| H | -4.23144200 | 2.60580200  | 0.12279000  |
| H | -3.31122000 | 1.93069700  | 1.46943400  |
| C | -1.74486100 | 2.40913000  | -1.51043000 |
| C | -0.59004300 | 2.99087900  | -2.02255600 |
| C | 0.20254300  | 3.80356100  | -1.21546700 |
| C | -0.17320700 | 4.03875500  | 0.10195500  |
| C | -1.32267400 | 3.44698000  | 0.61588600  |
| H | -1.60704200 | 3.62760500  | 1.64937700  |
| H | 1.09644300  | 4.26786700  | -1.61846300 |
| H | 0.43239700  | 4.67890900  | 0.73519900  |
| H | -2.37748400 | 1.79304300  | -2.14197700 |
| H | -0.32112500 | 2.82886600  | -3.06185200 |

Gal-6B\_Et<sub>2</sub>O

Charge=+1, Multiplicity=+1

|   |             |             |             |
|---|-------------|-------------|-------------|
| C | 0.80119800  | 3.26413800  | -0.53396800 |
| O | 2.16474100  | 3.33667700  | -0.91922700 |
| C | 2.81398200  | 2.75663100  | 0.19062600  |
| C | 0.40802000  | 1.81207000  | -0.78384200 |
| H | 0.21467000  | 3.93942700  | -1.15651600 |
| C | 0.86155000  | 3.67551400  | 0.93436700  |
| C | 1.17390500  | 0.82663100  | 0.10041700  |
| H | 0.59925000  | 1.59162000  | -1.83656500 |
| O | -1.02085200 | 1.67933700  | -0.54189300 |
| C | 2.66391100  | 1.23324600  | 0.12683600  |
| O | 0.61836500  | 0.83889800  | 1.39119300  |
| H | 1.10930900  | -0.17269200 | -0.34561400 |
| O | 3.31819600  | 0.80270200  | -1.04375600 |
| H | 3.10938100  | 0.79508400  | 1.02732900  |
| O | 2.17893400  | 3.28444700  | 1.32822300  |
| H | 3.86524800  | 3.04676400  | 0.16897900  |
| H | 0.12325000  | 3.16828200  | 1.55556300  |
| H | 0.76560800  | 4.75906300  | 1.03523800  |
| C | -1.66957700 | 0.75810900  | -1.13341100 |
| C | -3.05317600 | 0.59558100  | -0.94117300 |

|   |             |             |             |
|---|-------------|-------------|-------------|
| H | -1.13257200 | 0.10969400  | -1.82768900 |
| C | -3.77400000 | 1.39134600  | -0.02570800 |
| C | -5.13259100 | 1.20723500  | 0.09860500  |
| C | -5.77789800 | 0.23835300  | -0.67771200 |
| C | -5.07231400 | -0.55757900 | -1.57674400 |
| C | -3.70738800 | -0.38845500 | -1.70760000 |
| H | -3.25233700 | 2.13389100  | 0.56629000  |
| H | -5.70277700 | 1.80922500  | 0.79580100  |
| H | -6.84945400 | 0.10374100  | -0.57476400 |
| H | -5.58873900 | -1.30635900 | -2.16485200 |
| H | -3.13719900 | -0.99956200 | -2.39884400 |
| C | 0.46956800  | -0.45145700 | 1.98555800  |
| C | -0.78897700 | -1.14177900 | 1.53792300  |
| H | 0.43984100  | -0.26779300 | 3.06096900  |
| H | 1.34797700  | -1.06981600 | 1.76912500  |
| C | -2.01129500 | -0.81861600 | 2.12987300  |
| C | -3.17822000 | -1.46283700 | 1.74010800  |
| C | -3.13769400 | -2.44013500 | 0.74831500  |
| C | -1.92810100 | -2.76326800 | 0.14531700  |
| C | -0.76019600 | -2.11578700 | 0.53758000  |
| H | -2.04244000 | -0.06730200 | 2.91349700  |
| H | -4.11999800 | -1.21180300 | 2.21623900  |
| H | -4.04739900 | -2.95185600 | 0.45337300  |
| H | -1.88846100 | -3.53094400 | -0.62063400 |
| H | 0.18709700  | -2.39987100 | 0.08955100  |
| C | 4.21670900  | -0.28708600 | -0.86548200 |
| C | 3.52769400  | -1.60357700 | -0.62404200 |
| H | 4.79336900  | -0.32755500 | -1.79217000 |
| H | 4.90996900  | -0.06709100 | -0.04438200 |
| C | 3.63727000  | -2.25786200 | 0.60103600  |
| C | 3.01353200  | -3.48576500 | 0.80861600  |
| C | 2.27500100  | -4.07053800 | -0.21221800 |
| C | 2.15515500  | -3.42130900 | -1.43955400 |
| C | 2.77557500  | -2.19566500 | -1.64184400 |
| H | 2.69329900  | -1.69610500 | -2.60293400 |
| H | 1.79449000  | -5.03034500 | -0.05523600 |
| H | 1.58605400  | -3.87934300 | -2.24208300 |
| H | 4.22774900  | -1.81175200 | 1.39637400  |

|   |            |             |            |
|---|------------|-------------|------------|
| H | 3.10988200 | -3.98593000 | 1.76636200 |
|---|------------|-------------|------------|

Gal-6B\_CHCl<sub>3</sub>

Charge=+1, Multiplicity=+1

|   |             |             |             |
|---|-------------|-------------|-------------|
| C | -0.80052900 | -3.26147700 | -0.53406400 |
| O | -2.16423100 | -3.33557000 | -0.91928600 |
| C | -2.81407100 | -2.75625100 | 0.19059200  |
| C | -0.40859000 | -1.80897300 | -0.78324400 |
| H | -0.21324900 | -3.93589800 | -1.15676700 |
| C | -0.86042000 | -3.67334700 | 0.93406800  |
| C | -1.17611800 | -0.82443900 | 0.10066300  |
| H | -0.59929400 | -1.58838100 | -1.83599400 |
| O | 1.01953200  | -1.67520500 | -0.53991700 |
| C | -2.66565100 | -1.23273300 | 0.12687800  |
| O | -0.62192500 | -0.83575700 | 1.39216600  |
| H | -1.11207900 | 0.17476200  | -0.34554300 |
| O | -3.32108500 | -0.80326600 | -1.04359000 |
| H | -3.11171700 | -0.79502700 | 1.02727400  |
| O | -2.17847300 | -3.28392700 | 1.32810300  |
| H | -3.86506800 | -3.04738700 | 0.16905500  |
| H | -0.12268300 | -3.16537800 | 1.55529900  |
| H | -0.76314200 | -4.75677200 | 1.03471300  |
| C | 1.66965000  | -0.75774100 | -1.13590800 |
| C | 3.05312000  | -0.59553700 | -0.94269400 |
| H | 1.13388200  | -0.11273300 | -1.83427200 |
| C | 3.77218700  | -1.38794000 | -0.02296600 |
| C | 5.13078100  | -1.20424000 | 0.10233400  |
| C | 5.77767800  | -0.23897400 | -0.67706000 |
| C | 5.07378600  | 0.55364000  | -1.58042600 |
| C | 3.70898300  | 0.38477000  | -1.71251600 |
| H | 3.24937200  | -2.12765300 | 0.57153700  |
| H | 5.69956400  | -1.80355600 | 0.80296600  |
| H | 6.84912400  | -0.10441300 | -0.57307400 |
| H | 5.59145000  | 1.29971300  | -2.17085700 |
| H | 3.14007500  | 0.99330800  | -2.40705600 |
| C | -0.47136300 | 0.45522600  | 1.98500100  |
| C | 0.78921300  | 1.14246900  | 1.53842000  |
| H | -0.44355400 | 0.27291200  | 3.06069600  |

|   |             |            |             |
|---|-------------|------------|-------------|
| H | -1.34830900 | 1.07491000 | 1.76646100  |
| C | 0.76410500  | 2.11445500 | 0.53602400  |
| C | 1.93404200  | 2.75837400 | 0.14394400  |
| C | 3.14205000  | 2.43382000 | 0.74938800  |
| C | 3.17888300  | 1.45861600 | 1.74338300  |
| C | 2.00989700  | 0.81784600 | 2.13288400  |
| H | -0.18185100 | 2.39932700 | 0.08569000  |
| H | 1.89735300  | 3.52387500 | -0.62432300 |
| H | 4.05345000  | 2.94232900 | 0.45412800  |
| H | 4.11944000  | 1.20613500 | 2.22115400  |
| H | 2.03835100  | 0.06780600 | 2.91783300  |
| C | -4.21885000 | 0.28719000 | -0.86529200 |
| C | -3.52891900 | 1.60328200 | -0.62430000 |
| H | -4.79579100 | 0.32785700 | -1.79180400 |
| H | -4.91184900 | 0.06780700 | -0.04384000 |
| C | -3.63894700 | 2.25837400 | 0.60030000  |
| C | -3.01385500 | 3.48564600 | 0.80777500  |
| C | -2.27351200 | 4.06884500 | -0.21266100 |
| C | -2.15320700 | 3.41872600 | -1.43952300 |
| C | -2.77503400 | 2.19378500 | -1.64173900 |
| H | -2.69177900 | 1.69328200 | -2.60224300 |
| H | -1.79147000 | 5.02789100 | -0.05564600 |
| H | -1.58211600 | 3.87520900 | -2.24151500 |
| H | -4.23026400 | 1.81307600 | 1.39546900  |
| H | -3.11025000 | 3.98631300 | 1.76526100  |

Gal-6B\_DCM

Charge=+1, Multiplicity=+1

|   |             |             |             |
|---|-------------|-------------|-------------|
| C | -0.75842800 | -3.25439400 | -0.49235000 |
| O | -2.11684700 | -3.35592200 | -0.89372700 |
| C | -2.78905800 | -2.76171700 | 0.19475700  |
| C | -0.38175400 | -1.80184800 | -0.76444400 |
| H | -0.15349500 | -3.93261300 | -1.09322200 |
| C | -0.83257900 | -3.63798500 | 0.98243300  |
| C | -1.17490700 | -0.81043300 | 0.08865500  |
| H | -0.56043300 | -1.60415800 | -1.82368000 |
| O | 1.03879700  | -1.64513900 | -0.50285200 |
| C | -2.65877900 | -1.23836200 | 0.10142000  |

|   |             |             |             |
|---|-------------|-------------|-------------|
| O | -0.64424600 | -0.78609200 | 1.39035100  |
| H | -1.11629300 | 0.17959900  | -0.37716400 |
| O | -3.30157100 | -0.84080600 | -1.08820000 |
| H | -3.12416600 | -0.78713500 | 0.98485000  |
| O | -2.16230600 | -3.25935300 | 1.35139100  |
| H | -3.83603400 | -3.06657500 | 0.16586600  |
| H | -0.11015700 | -3.10748800 | 1.60267700  |
| H | -0.72182700 | -4.71755300 | 1.10634200  |
| C | 1.69718500  | -0.76436200 | -1.14404000 |
| C | 3.07768000  | -0.59079000 | -0.93928700 |
| H | 1.17081400  | -0.16291100 | -1.88716700 |
| C | 3.78318300  | -1.33358600 | 0.03075000  |
| C | 5.14014600  | -1.14235200 | 0.16601900  |
| C | 5.79747400  | -0.21712000 | -0.65147300 |
| C | 5.10631900  | 0.52753700  | -1.60474300 |
| C | 3.74424400  | 0.34932800  | -1.74913500 |
| H | 3.25251900  | -2.04260200 | 0.65486600  |
| H | 5.69851300  | -1.70356500 | 0.90553100  |
| H | 6.86690200  | -0.07500500 | -0.53793800 |
| H | 5.63205900  | 1.24383600  | -2.22412700 |
| H | 3.18478700  | 0.92052100  | -2.48200500 |
| C | -0.49171600 | 0.52168600  | 1.94615600  |
| C | 0.78397200  | 1.18383200  | 1.50474300  |
| H | -0.48605700 | 0.37200300  | 3.02723300  |
| H | -1.35888100 | 1.14132100  | 1.69208000  |
| C | 0.79069900  | 2.11780100  | 0.46649900  |
| C | 1.97548100  | 2.73484100  | 0.07556900  |
| C | 3.16687700  | 2.42213300  | 0.71903900  |
| C | 3.17188100  | 1.48513600  | 1.74966600  |
| C | 1.98796300  | 0.87043100  | 2.13749700  |
| H | -0.14241600 | 2.39261900  | -0.01574500 |
| H | 1.96374800  | 3.46754200  | -0.72478300 |
| H | 4.09027600  | 2.90758000  | 0.42228900  |
| H | 4.09945600  | 1.24024000  | 2.25588000  |
| H | 1.99265200  | 0.14850800  | 2.94889800  |
| C | -4.22895800 | 0.22995100  | -0.93833400 |
| C | -3.57494900 | 1.55513800  | -0.65306100 |
| H | -4.76638900 | 0.26855700  | -1.88820200 |

|   |             |             |             |
|---|-------------|-------------|-------------|
| H | -4.95052400 | -0.01218500 | -0.14862900 |
| C | -3.73052500 | 2.17857400  | 0.58310700  |
| C | -3.12751300 | 3.40772400  | 0.83949000  |
| C | -2.36419400 | 4.02448300  | -0.14372700 |
| C | -2.20125100 | 3.40767700  | -1.38291200 |
| C | -2.80104500 | 2.18068700  | -1.63390400 |
| H | -2.67996800 | 1.70455500  | -2.60272700 |
| H | -1.89613800 | 4.98344900  | 0.05179300  |
| H | -1.61078300 | 3.88983700  | -2.15530600 |
| H | -4.33623200 | 1.70378500  | 1.34999400  |
| H | -3.25725300 | 3.88226600  | 1.80635800  |

Gal-6B\_ACN

Charge=+1, Multiplicity=+1

|   |             |             |             |
|---|-------------|-------------|-------------|
| C | -0.78139600 | -3.22385900 | -0.54405900 |
| O | -2.14628200 | -3.32162000 | -0.92713900 |
| C | -2.80452100 | -2.76293200 | 0.18835300  |
| C | -0.41313700 | -1.76176400 | -0.77368600 |
| H | -0.18202800 | -3.87930800 | -1.17482800 |
| C | -0.83066500 | -3.65277200 | 0.91879400  |
| C | -1.20361400 | -0.79985100 | 0.11546400  |
| H | -0.59874000 | -1.52983100 | -1.82467200 |
| O | 1.00640100  | -1.61064100 | -0.51372100 |
| C | -2.68490700 | -1.23685800 | 0.13529700  |
| O | -0.66437500 | -0.80744700 | 1.41482200  |
| H | -1.15261600 | 0.20198800  | -0.32361500 |
| O | -3.35334600 | -0.81825800 | -1.03299600 |
| H | -3.14211800 | -0.81208800 | 1.03615800  |
| O | -2.15722000 | -3.29192200 | 1.31997700  |
| H | -3.85038900 | -3.07219800 | 0.16732900  |
| H | -0.10069300 | -3.13769200 | 1.54305300  |
| H | -0.71286500 | -4.73484800 | 1.00864000  |
| C | 1.67609100  | -0.75046100 | -1.17106300 |
| C | 3.05825200  | -0.59138200 | -0.96444900 |
| H | 1.15800600  | -0.15460500 | -1.92404100 |
| C | 3.75253300  | -1.33762900 | 0.01085500  |
| C | 5.11087000  | -1.15854100 | 0.15129400  |
| C | 5.77951800  | -0.24055100 | -0.66476100 |



|   |             |             |             |
|---|-------------|-------------|-------------|
| C | 5.09901900  | 0.50740800  | -1.62351900 |
| C | 3.73658600  | 0.33942000  | -1.77529900 |
| H | 3.21291800  | -2.04045700 | 0.63430000  |
| H | 5.66078700  | -1.72289100 | 0.89471200  |
| H | 6.84934300  | -0.10622100 | -0.54590400 |
| H | 5.63369800  | 1.21828100  | -2.24150200 |
| H | 3.18539800  | 0.91348300  | -2.51209300 |
| C | -0.49387800 | 0.48765500  | 1.99530300  |
| C | 0.78260600  | 1.14841000  | 1.55466600  |
| H | -0.47918400 | 0.31610800  | 3.07304700  |
| H | -1.35825500 | 1.11925400  | 1.76153400  |
| C | 0.78798200  | 2.08923900  | 0.52283900  |
| C | 1.97397900  | 2.70027200  | 0.12632500  |
| C | 3.16803500  | 2.37599700  | 0.75933200  |
| C | 3.17412700  | 1.43274100  | 1.78411600  |
| C | 1.98883200  | 0.82284700  | 2.17667200  |
| H | -0.14549100 | 2.37069300  | 0.04561100  |
| H | 1.96145000  | 3.43424900  | -0.67277300 |
| H | 4.09302500  | 2.85461000  | 0.45643200  |
| H | 4.10405700  | 1.17646300  | 2.28028800  |
| H | 1.99541900  | 0.09350900  | 2.98145600  |
| C | -4.24220400 | 0.28002000  | -0.85578300 |
| C | -3.54239000 | 1.59330800  | -0.62813600 |
| H | -4.82481700 | 0.31856200  | -1.77896400 |
| H | -4.93020900 | 0.07066100  | -0.02773700 |
| C | -2.76823300 | 2.15928300  | -1.64444900 |
| C | -2.13205800 | 3.37832500  | -1.45098200 |
| C | -2.26027200 | 4.04768800  | -0.23502300 |
| C | -3.02186300 | 3.48910900  | 0.78386500  |
| C | -3.65973900 | 2.26654500  | 0.58594200  |
| H | -4.26114100 | 1.83589400  | 1.38155200  |
| H | -1.76312000 | 5.00010000  | -0.08403200 |
| H | -3.12117900 | 4.00270100  | 1.73429500  |
| H | -2.67203200 | 1.64116600  | -2.59419900 |
| H | -1.53798100 | 3.81152400  | -2.24905300 |

Gal-6B\_DMSO

Charge=+1, Multiplicity=+1

|   |             |             |             |
|---|-------------|-------------|-------------|
| C | -0.76960700 | -3.22297700 | -0.52971600 |
| O | -2.13256800 | -3.32854200 | -0.91818600 |
| C | -2.79781500 | -2.76434200 | 0.19026600  |
| C | -0.40569400 | -1.76100200 | -0.76733000 |
| H | -0.16491900 | -3.88034100 | -1.15334000 |
| C | -0.82392200 | -3.64206600 | 0.93570900  |
| C | -1.20350100 | -0.79613700 | 0.11211200  |
| H | -0.58783400 | -1.53639900 | -1.82051400 |
| O | 1.01189500  | -1.60313400 | -0.50226300 |
| C | -2.68326300 | -1.23833200 | 0.12734600  |
| O | -0.67117300 | -0.79230900 | 1.41440500  |
| H | -1.15437200 | 0.20288000  | -0.33338600 |
| O | -3.34592100 | -0.82935500 | -1.04779700 |
| H | -3.14673600 | -0.80888400 | 1.02270200  |
| O | -2.15347900 | -3.28295000 | 1.32860500  |
| H | -3.84243000 | -3.07766200 | 0.16724300  |
| H | -0.09837600 | -3.12030600 | 1.55959300  |
| H | -0.70284300 | -4.72310600 | 1.03337700  |
| C | 1.68367900  | -0.75294500 | -1.17043100 |
| C | 3.06536300  | -0.59119400 | -0.96225600 |
| H | 1.16771600  | -0.16792600 | -1.93325900 |
| C | 3.75732500  | -1.32600600 | 0.02322900  |
| C | 5.11537300  | -1.14502500 | 0.16497000  |
| C | 5.78572500  | -0.23601400 | -0.65948100 |
| C | 5.10736200  | 0.50097200  | -1.62832900 |
| C | 3.74550500  | 0.33059500  | -1.78189600 |
| H | 3.21639200  | -2.02208200 | 0.65304200  |
| H | 5.66357500  | -1.70088700 | 0.91599700  |
| H | 6.85519000  | -0.09996000 | -0.53941100 |
| H | 5.64341300  | 1.20506600  | -2.25283700 |
| H | 3.19594900  | 0.89619700  | -2.52639200 |
| C | -0.49971200 | 0.50790700  | 1.98319600  |
| C | 0.78097500  | 1.16113900  | 1.54341900  |
| H | -0.49108400 | 0.34668200  | 3.06262100  |
| H | -1.36109600 | 1.13949400  | 1.73886300  |
| C | 0.79491000  | 2.09166900  | 0.50234400  |
| C | 1.98474600  | 2.69621600  | 0.10730000  |
| C | 3.17408500  | 2.37593700  | 0.75110300  |

|   |             |            |             |
|---|-------------|------------|-------------|
| C | 3.17163800  | 1.44284600 | 1.78512800  |
| C | 1.98255300  | 0.83926500 | 2.17616100  |
| H | -0.13495500 | 2.37013700 | 0.01638200  |
| H | 1.97886800  | 3.42181100 | -0.69947100 |
| H | 4.10201200  | 2.84935700 | 0.44908100  |
| H | 4.09781700  | 1.18949800 | 2.28973300  |
| H | 1.98259900  | 0.11789700 | 2.98811300  |
| C | -4.24431400 | 0.26289500 | -0.88096600 |
| C | -3.55514200 | 1.57900600 | -0.63839800 |
| H | -4.81312300 | 0.30057000 | -1.81271000 |
| H | -4.94316600 | 0.04671500 | -0.06382700 |
| C | -2.77435700 | 2.15620400 | -1.64322400 |
| C | -2.14449200 | 3.37592900 | -1.43409900 |
| C | -2.28539800 | 4.03450300 | -0.21367800 |
| C | -3.05433600 | 3.46509800 | 0.79364900  |
| C | -3.68617400 | 2.24209000 | 0.57988500  |
| H | -4.29283900 | 1.80268400 | 1.36666600  |
| H | -1.79280700 | 4.98726100 | -0.05046800 |
| H | -3.16406800 | 3.97051900 | 1.74730200  |
| H | -2.66718300 | 1.64601200 | -2.59607800 |
| H | -1.54480600 | 3.81771200 | -2.22321400 |

Gal-6B\_Water

Charge=+1, Multiplicity=+1

|   |             |             |             |
|---|-------------|-------------|-------------|
| C | 0.78662200  | 3.21375200  | -0.55667700 |
| O | 2.15282700  | 3.31180200  | -0.93560800 |
| C | 2.80835300  | 2.76297200  | 0.18632300  |
| C | 0.42144200  | 1.74906700  | -0.77491600 |
| H | 0.18792100  | 3.86262700  | -1.19479400 |
| C | 0.82977500  | 3.65445300  | 0.90275600  |
| C | 1.21226300  | 0.79588600  | 0.12343500  |
| H | 0.60846100  | 1.50797000  | -1.82361500 |
| O | -0.99762700 | 1.59855800  | -0.51445900 |
| C | 2.69254700  | 1.23635700  | 0.14361300  |
| O | 0.67155100  | 0.81146300  | 1.42236000  |
| H | 1.16409900  | -0.20914200 | -0.30794800 |
| O | 3.36614700  | 0.81317300  | -1.02010600 |
| H | 3.14893400  | 0.81828200  | 1.04808800  |

|   |             |             |             |
|---|-------------|-------------|-------------|
| O | 2.15569200  | 3.29904200  | 1.31171100  |
| H | 3.85358200  | 3.07449300  | 0.16689200  |
| H | 0.09828600  | 3.14315300  | 1.52833400  |
| H | 0.70977300  | 4.73697800  | 0.98361200  |
| C | -1.67134300 | 0.74672900  | -1.17851000 |
| C | -3.05388400 | 0.59161100  | -0.97081300 |
| H | -1.15658000 | 0.15516400  | -1.93704300 |
| C | -3.74406000 | 1.33621200  | 0.00857300  |
| C | -5.10276600 | 1.16071100  | 0.15080000  |
| C | -5.77546200 | 0.24740400  | -0.66701900 |
| C | -5.09888100 | -0.49898300 | -1.62989700 |
| C | -3.73642200 | -0.33390400 | -1.78418300 |
| H | -3.20122800 | 2.03532600  | 0.63339500  |
| H | -5.64962600 | 1.72403200  | 0.89724200  |
| H | -6.84538100 | 0.11542800  | -0.54641300 |
| H | -5.63675600 | -1.20626300 | -2.24922600 |
| H | -3.18823400 | -0.90688600 | -2.52404700 |
| C | 0.49519500  | -0.48056300 | 2.00809200  |
| C | -0.78193800 | -1.13973600 | 1.56705800  |
| H | 0.47821300  | -0.30424000 | 3.08503200  |
| H | 1.35835600  | -1.11567100 | 1.77921400  |
| C | -1.98805300 | -0.81291600 | 2.18847800  |
| C | -3.17410800 | -1.42054200 | 1.79427000  |
| C | -3.16882500 | -2.36248500 | 0.76834200  |
| C | -1.97476900 | -2.68779800 | 0.13578800  |
| C | -0.78808100 | -2.07934400 | 0.53414800  |
| H | -1.99426000 | -0.08407700 | 2.99372800  |
| H | -4.10404900 | -1.16294300 | 2.28973600  |
| H | -4.09448500 | -2.83862500 | 0.46358900  |
| H | -1.96281300 | -3.41987900 | -0.66504100 |
| H | 0.14498000  | -2.36124000 | 0.05647200  |
| C | 4.24475000  | -0.29230100 | -0.83791800 |
| C | 3.53385600  | -1.60196000 | -0.62355100 |
| H | 4.83697200  | -0.33138400 | -1.75501600 |
| H | 4.92541400  | -0.09140600 | -0.00175800 |
| C | 3.64377100  | -2.28694100 | 0.58462900  |
| C | 2.99761400  | -3.50722200 | 0.76963100  |
| C | 2.23470900  | -4.05128000 | -0.25615100 |

|   |            |             |             |
|---|------------|-------------|-------------|
| C | 2.11306700 | -3.36945900 | -1.46588900 |
| C | 2.75792900 | -2.15304000 | -1.64671900 |
| H | 2.66614500 | -1.62495800 | -2.59137500 |
| H | 1.73060000 | -5.00156900 | -0.11507400 |
| H | 1.51675100 | -3.79049300 | -2.26875700 |
| H | 4.24534200 | -1.86699700 | 1.38581000  |
| H | 3.09105000 | -4.03005600 | 1.71562200  |

Man-4B\_Dioxane

Charge=+1, Multiplicity=+1

|   |             |             |             |
|---|-------------|-------------|-------------|
| C | 1.50139500  | -0.95744600 | -0.49989200 |
| C | 2.47806100  | -1.33050000 | 0.62947300  |
| C | 1.95994600  | -0.89052500 | 2.00164900  |
| O | 0.79144100  | -1.69817900 | 2.14637600  |
| H | 2.70808600  | -1.18535400 | 2.74948400  |
| C | 1.65178400  | 0.55267000  | 2.31385700  |
| C | 0.87840900  | -2.62880300 | 1.05725400  |
| C | 0.36064100  | -1.96431900 | -0.21733200 |
| O | -0.90875100 | -1.40628400 | -0.03579200 |
| H | 0.35047200  | -2.70906700 | -1.02309600 |
| O | 2.03309300  | -1.17260700 | -1.78095500 |
| H | 1.13350100  | 0.06893500  | -0.41500700 |
| O | 2.24278800  | -2.74203300 | 0.78370100  |
| H | 3.52819300  | -1.13123200 | 0.43909200  |
| H | 0.43230100  | -3.57687800 | 1.34542700  |
| O | 0.55813500  | 1.10699700  | 1.53622100  |
| H | 2.50474800  | 1.18937500  | 2.08129500  |
| H | 1.39038600  | 0.66031400  | 3.36845100  |
| C | -0.64412400 | 0.79085900  | 1.83642800  |
| C | -1.72943500 | 1.40759800  | 1.18741900  |
| H | -0.80037700 | 0.07190200  | 2.63939100  |
| C | -3.02738800 | 1.09027200  | 1.63528100  |
| C | -4.11743100 | 1.72681100  | 1.07514200  |
| C | -3.91871300 | 2.65353700  | 0.05671400  |
| C | -2.63348900 | 2.96751500  | -0.40260000 |
| C | -1.53722100 | 2.35408200  | 0.15757000  |
| H | -3.16421400 | 0.35238600  | 2.41848100  |
| H | -5.11935200 | 1.48961000  | 1.40917600  |

|   |             |             |             |
|---|-------------|-------------|-------------|
| H | -4.77626800 | 3.14430600  | -0.39095800 |
| H | -2.50650400 | 3.69505100  | -1.19561600 |
| H | -0.53307700 | 2.59264000  | -0.17449800 |
| C | -1.52834300 | -1.03680500 | -1.25488100 |
| C | -3.00912900 | -0.88841000 | -1.06511400 |
| H | -1.32986000 | -1.81258900 | -2.00857700 |
| H | -1.09724800 | -0.10080800 | -1.63811000 |
| C | -3.68559100 | -1.61436300 | -0.08621900 |
| C | -5.06704000 | -1.51156000 | 0.03492600  |
| C | -5.78580100 | -0.68683600 | -0.82329300 |
| C | -5.11494800 | 0.03735900  | -1.80324900 |
| C | -3.73314500 | -0.06049600 | -1.91920300 |
| H | -3.12237300 | -2.26054900 | 0.57775200  |
| H | -5.58408800 | -2.08357300 | 0.79850600  |
| H | -6.86424200 | -0.61197700 | -0.73281200 |
| H | -5.66868300 | 0.68159200  | -2.47829900 |
| H | -3.21345000 | 0.51332100  | -2.68146600 |
| C | 2.56849900  | 0.00485900  | -2.38005000 |
| C | 3.67874500  | 0.62236900  | -1.57512600 |
| H | 1.76004300  | 0.73591000  | -2.52664300 |
| H | 2.92416700  | -0.31420700 | -3.36099600 |
| C | 3.44891200  | 1.75722300  | -0.79969900 |
| C | 4.44945400  | 2.27436800  | 0.01841400  |
| C | 5.69316300  | 1.65540500  | 0.06576800  |
| C | 5.93669700  | 0.52919400  | -0.71657400 |
| C | 4.93633700  | 0.01840900  | -1.53297100 |
| H | 2.47809200  | 2.24476700  | -0.84122200 |
| H | 4.26252000  | 3.16513300  | 0.60957700  |
| H | 6.47709800  | 2.05633400  | 0.69931600  |
| H | 6.91038900  | 0.05181300  | -0.69160300 |
| H | 5.12462300  | -0.86511300 | -2.13559400 |

Man-4B\_Toluene

Charge=+1, Multiplicity=+1

|   |             |             |             |
|---|-------------|-------------|-------------|
| C | -1.64864800 | -0.67720700 | 1.08582900  |
| C | -3.16265000 | -0.82646000 | 0.99923300  |
| C | -3.73310900 | -0.07852200 | -0.21521300 |
| O | -3.20375300 | -0.83473600 | -1.30383500 |

|   |             |             |             |
|---|-------------|-------------|-------------|
| H | -4.82598600 | -0.18152000 | -0.19373800 |
| C | -3.48956800 | 1.39669500  | -0.42917700 |
| C | -2.58708300 | -1.96150700 | -0.67304800 |
| C | -1.21100200 | -1.52536100 | -0.13188400 |
| O | -0.45133100 | -0.76454200 | -1.03087400 |
| H | -0.65971600 | -2.40589500 | 0.21490300  |
| O | -1.22036400 | -1.18082800 | 2.32256200  |
| H | -1.30945100 | 0.35363600  | 0.96411900  |
| O | -3.31719000 | -2.16553500 | 0.50045100  |
| H | -3.70392100 | -0.69460600 | 1.93263000  |
| H | -2.63180900 | -2.82260200 | -1.33503400 |
| O | -2.09082500 | 1.74865300  | -0.59343800 |
| H | -3.82053000 | 1.97864200  | 0.42968800  |
| H | -4.02148400 | 1.73319800  | -1.32096100 |
| C | -1.52003100 | 1.55025400  | -1.71595600 |
| C | -0.17893900 | 1.94374300  | -1.92345300 |
| H | -2.11176000 | 1.12826100  | -2.52784200 |
| C | 0.62916300  | 2.41436500  | -0.87034800 |
| C | 1.93119400  | 2.77921000  | -1.14002100 |
| C | 2.43203100  | 2.67844200  | -2.44080300 |
| C | 1.63870100  | 2.20786900  | -3.48532400 |
| C | 0.33251500  | 1.83484900  | -3.23023400 |
| H | 0.23704400  | 2.47457400  | 0.13919500  |
| H | 2.56553200  | 3.13853800  | -0.33902600 |
| H | 3.45804400  | 2.96930100  | -2.64000300 |
| H | 2.04256500  | 2.13476900  | -4.48798100 |
| H | -0.30216900 | 1.46685500  | -4.03028600 |
| C | 0.37995300  | -1.53904400 | -1.89950600 |
| C | 1.56456800  | -2.10139800 | -1.16891500 |
| H | 0.70318800  | -0.84241800 | -2.67649300 |
| H | -0.20409900 | -2.33554900 | -2.37543900 |
| C | 1.61992600  | -3.44795700 | -0.81487000 |
| C | 2.69590400  | -3.94374100 | -0.08483700 |
| C | 3.72963500  | -3.09436800 | 0.28966100  |
| C | 3.68775600  | -1.74985800 | -0.07063200 |
| C | 2.60966200  | -1.25645900 | -0.79231900 |
| H | 0.81858900  | -4.11686800 | -1.11636300 |
| H | 2.72664300  | -4.99303200 | 0.18793700  |

|   |             |             |             |
|---|-------------|-------------|-------------|
| H | 4.57148700  | -3.47919100 | 0.85515500  |
| H | 4.50097800  | -1.08820500 | 0.21027300  |
| H | 2.57281400  | -0.20568700 | -1.06419600 |
| C | 0.17218700  | -1.03332900 | 2.53870600  |
| C | 0.62938400  | 0.40245300  | 2.61874100  |
| H | 0.74725200  | -1.55833700 | 1.76360000  |
| H | 0.36486400  | -1.54215400 | 3.48696100  |
| C | -0.21702700 | 1.40620400  | 3.08882100  |
| C | 0.22840900  | 2.72021700  | 3.17927300  |
| C | 1.53449200  | 3.04269400  | 2.82212200  |
| C | 2.38803700  | 2.04283000  | 2.36819100  |
| C | 1.93196600  | 0.73449500  | 2.25266600  |
| H | -1.22821300 | 1.15036200  | 3.38941100  |
| H | -0.44000800 | 3.49255600  | 3.54565000  |
| H | 1.88618500  | 4.06546700  | 2.90731300  |
| H | 3.41284400  | 2.28159200  | 2.10161500  |
| H | 2.59428000  | -0.04042500 | 1.87975900  |

Man-4B\_Et2O

Charge=+1, Multiplicity=+1

|   |            |             |             |
|---|------------|-------------|-------------|
| C | 2.42857300 | -0.14638800 | -0.63116000 |
| C | 3.56303100 | -0.98245900 | -0.04766300 |
| C | 3.11108500 | -1.76797400 | 1.18915800  |
| O | 2.16333700 | -2.67784500 | 0.62560000  |
| H | 3.97744900 | -2.32800800 | 1.56436200  |
| C | 2.53779000 | -1.08600900 | 2.40715200  |
| C | 2.31767100 | -2.50658900 | -0.78611100 |
| C | 1.52917800 | -1.25609700 | -1.22236600 |
| O | 0.22729700 | -1.14493200 | -0.72532500 |
| H | 1.53649800 | -1.20794200 | -2.31958900 |
| O | 2.96859400 | 0.73500200  | -1.58187200 |
| H | 1.87509600 | 0.41286200  | 0.12617800  |
| O | 3.64071500 | -2.08936700 | -0.96434000 |
| H | 4.52187500 | -0.47795200 | 0.03770200  |
| H | 2.11542300 | -3.44449800 | -1.29781200 |
| O | 1.30178800 | -0.37156400 | 2.15792900  |
| H | 3.22396800 | -0.33235800 | 2.79036400  |
| H | 2.34123500 | -1.82540700 | 3.18571800  |



|   |             |             |             |
|---|-------------|-------------|-------------|
| C | 0.20870600  | -1.03057300 | 2.09859200  |
| C | -1.02546400 | -0.37464700 | 1.94956000  |
| H | 0.25634100  | -2.11232800 | 2.21908800  |
| C | -1.11172300 | 1.02341400  | 1.78141300  |
| C | -2.35363300 | 1.60846900  | 1.69309400  |
| C | -3.50579100 | 0.81744600  | 1.76231500  |
| C | -3.42829500 | -0.56404800 | 1.91594500  |
| C | -2.18956300 | -1.16686200 | 2.00230700  |
| H | -0.20990800 | 1.62233100  | 1.71785600  |
| H | -2.43884800 | 2.68006300  | 1.55995300  |
| H | -4.47941700 | 1.28979900  | 1.68767300  |
| H | -4.33084800 | -1.16096400 | 1.95073500  |
| H | -2.10487900 | -2.24273900 | 2.11642900  |
| C | -0.68664700 | -2.07411500 | -1.28568300 |
| C | -2.07488900 | -1.50137700 | -1.28123200 |
| H | -0.65861400 | -3.02017000 | -0.72955900 |
| H | -0.38800300 | -2.29373600 | -2.32095000 |
| C | -2.27864800 | -0.13342300 | -1.44325700 |
| C | -3.56779300 | 0.38039000  | -1.50777700 |
| C | -4.66647300 | -0.46775800 | -1.41405000 |
| C | -4.46819100 | -1.83439500 | -1.24644500 |
| C | -3.17841400 | -2.34726100 | -1.17589600 |
| H | -1.42110100 | 0.52683600  | -1.49860500 |
| H | -3.71507800 | 1.44895900  | -1.62913500 |
| H | -5.67269400 | -0.06552100 | -1.46658000 |
| H | -5.31959000 | -2.50200100 | -1.16503300 |
| H | -3.02768600 | -3.41450400 | -1.03906800 |
| C | 2.00897500  | 1.59446700  | -2.16916700 |
| C | 1.34544700  | 2.53616300  | -1.19450300 |
| H | 1.23996000  | 1.01595000  | -2.69907200 |
| H | 2.56259800  | 2.16105300  | -2.92271000 |
| C | 0.03717800  | 2.95895100  | -1.42058100 |
| C | -0.57640600 | 3.86053400  | -0.55814200 |
| C | 0.10802900  | 4.33491400  | 0.55551000  |
| C | 1.41279800  | 3.91146500  | 0.79255600  |
| C | 2.03026500  | 3.02415200  | -0.08178000 |
| H | -0.50432500 | 2.58757800  | -2.28636000 |
| H | -1.59196300 | 4.18860000  | -0.75459900 |

|   |             |            |            |
|---|-------------|------------|------------|
| H | -0.36963000 | 5.03425000 | 1.23370400 |
| H | 1.95511400  | 4.28267000 | 1.65608400 |
| H | 3.05239700  | 2.70445300 | 0.09655100 |

Man-4B\_CHCl<sub>3</sub>

Charge=+1, Multiplicity=+1

|   |             |             |             |
|---|-------------|-------------|-------------|
| C | 2.42877400  | -0.14510200 | -0.63058700 |
| C | 3.56307500  | -0.98178800 | -0.04791500 |
| C | 3.11114100  | -1.76899400 | 1.18779700  |
| O | 2.16419800  | -2.67904900 | 0.62273800  |
| H | 3.97766000  | -2.32892100 | 1.56263700  |
| C | 2.53736300  | -1.08875700 | 2.40647400  |
| C | 2.31775700  | -2.50518000 | -0.78841100 |
| C | 1.52890100  | -1.25408800 | -1.22232200 |
| O | 0.22756500  | -1.14353300 | -0.72376100 |
| H | 1.53495100  | -1.20465500 | -2.31948200 |
| O | 2.96889400  | 0.73652900  | -1.58134400 |
| H | 1.87585800  | 0.41407800  | 0.12715100  |
| O | 3.64090300  | -2.08732700 | -0.96650800 |
| H | 4.52182400  | -0.47734000 | 0.03869100  |
| H | 2.11527200  | -3.44201700 | -1.30195000 |
| O | 1.30150700  | -0.37384500 | 2.15740900  |
| H | 3.22338500  | -0.33564300 | 2.79092100  |
| H | 2.34040900  | -1.82918300 | 3.18389100  |
| C | 0.20814600  | -1.03220000 | 2.09915600  |
| C | -1.02580000 | -0.37549700 | 1.95030500  |
| H | 0.25498400  | -2.11392300 | 2.22017200  |
| C | -1.11129400 | 1.02256600  | 1.78223800  |
| C | -2.35288100 | 1.60829700  | 1.69339600  |
| C | -3.50547200 | 0.81784500  | 1.76207200  |
| C | -3.42866700 | -0.56365500 | 1.91576700  |
| C | -2.19021300 | -1.16712000 | 2.00277100  |
| H | -0.20911800 | 1.62098000  | 1.71927400  |
| H | -2.43760800 | 2.67992500  | 1.56026800  |
| H | -4.47879800 | 1.29073100  | 1.68694100  |
| H | -4.33150400 | -1.16016900 | 1.95024100  |
| H | -2.10593200 | -2.24301300 | 2.11678200  |
| C | -0.68612300 | -2.07468200 | -1.28139500 |

|   |             |             |             |
|---|-------------|-------------|-------------|
| C | -2.07431500 | -1.50177500 | -1.28025200 |
| H | -0.65867600 | -3.01838800 | -0.72135400 |
| H | -0.38661100 | -2.29839900 | -2.31547700 |
| C | -2.27787500 | -0.13400500 | -1.44409400 |
| C | -3.56694500 | 0.37982700  | -1.51067500 |
| C | -4.66576500 | -0.46821300 | -1.41742000 |
| C | -4.46768500 | -1.83470900 | -1.24814800 |
| C | -3.17800300 | -2.34753200 | -1.17537400 |
| H | -1.42023900 | 0.52615900  | -1.49893100 |
| H | -3.71401500 | 1.44832500  | -1.63289900 |
| H | -5.67191600 | -0.06593200 | -1.47107200 |
| H | -5.31919500 | -2.50217900 | -1.16662400 |
| H | -3.02738700 | -3.41452600 | -1.03652400 |
| C | 2.00903500  | 1.59586900  | -2.16852700 |
| C | 1.34519700  | 2.53719800  | -1.19372900 |
| H | 1.24023000  | 1.01717000  | -2.69845800 |
| H | 2.56243000  | 2.16277500  | -2.92200800 |
| C | 0.03688700  | 2.95981700  | -1.42008400 |
| C | -0.57725700 | 3.86069900  | -0.55729000 |
| C | 0.10671700  | 4.33464500  | 0.55686700  |
| C | 1.41149000  | 3.91133500  | 0.79417700  |
| C | 2.02947300  | 3.02459700  | -0.08041200 |
| H | -0.50434300 | 2.58852200  | -2.28605800 |
| H | -1.59309000 | 4.18804800  | -0.75351300 |
| H | -0.37161500 | 5.03296500  | 1.23564100  |
| H | 1.95321200  | 4.28160900  | 1.65847800  |
| H | 3.05131700  | 2.70442400  | 0.09868400  |

Man-4B\_DCM

Charge=+1, Multiplicity=+1

|   |            |             |             |
|---|------------|-------------|-------------|
| C | 2.43050800 | -0.13502500 | -0.62668800 |
| C | 3.56617700 | -0.97153400 | -0.04751300 |
| C | 3.11604900 | -1.76749500 | 1.18293800  |
| O | 2.17414100 | -2.67961900 | 0.61087700  |
| H | 3.98438300 | -2.32554900 | 1.55557800  |
| C | 2.53931100 | -1.09628200 | 2.40495100  |
| C | 2.32486500 | -2.49463200 | -0.79779400 |
| C | 1.53254800 | -1.24278000 | -1.22319100 |

|   |             |             |             |
|---|-------------|-------------|-------------|
| O | 0.23180600  | -1.13778100 | -0.72252200 |
| H | 1.53663800  | -1.18771100 | -2.32009400 |
| O | 2.96901900  | 0.75080500  | -1.57609700 |
| H | 1.87771600  | 0.42112900  | 0.13309600  |
| O | 3.64777500  | -2.07092800 | -0.97456300 |
| H | 4.52315900  | -0.46490600 | 0.04491400  |
| H | 2.12435100  | -3.42765200 | -1.31881100 |
| O | 1.30276600  | -0.38184100 | 2.15680400  |
| H | 3.22338100  | -0.34424800 | 2.79451700  |
| H | 2.34241900  | -1.84166400 | 3.17729300  |
| C | 0.20914500  | -1.03896200 | 2.10461200  |
| C | -1.02445300 | -0.38029900 | 1.95499700  |
| H | 0.25382600  | -2.12021200 | 2.23006200  |
| C | -1.10756100 | 1.01750400  | 1.78544200  |
| C | -2.34811900 | 1.60529000  | 1.69363500  |
| C | -3.50206300 | 0.81669200  | 1.76117600  |
| C | -3.42733500 | -0.56456900 | 1.91702200  |
| C | -2.18972500 | -1.16996200 | 2.00746400  |
| H | -0.20419000 | 1.61424200  | 1.72454400  |
| H | -2.43137600 | 2.67682200  | 1.55915600  |
| H | -4.47439700 | 1.29115000  | 1.68340900  |
| H | -4.33100000 | -1.15988100 | 1.95119700  |
| H | -2.10659700 | -2.24560200 | 2.12282200  |
| C | -0.67767100 | -2.07576300 | -1.27612600 |
| C | -2.06789200 | -1.50784100 | -1.28081100 |
| H | -0.64800000 | -3.01515800 | -0.70949800 |
| H | -0.37542600 | -2.30501200 | -2.30809200 |
| C | -2.27674400 | -0.14156900 | -1.45081900 |
| C | -3.56773000 | 0.36745500  | -1.51975300 |
| C | -4.66343400 | -0.48440200 | -1.42339500 |
| C | -4.46015500 | -1.84951600 | -1.24811200 |
| C | -3.16851200 | -2.35724300 | -1.17236000 |
| H | -1.42161800 | 0.52158800  | -1.50763600 |
| H | -3.71850700 | 1.43514100  | -1.64441000 |
| H | -5.67108200 | -0.08575100 | -1.47667100 |
| H | -5.30916400 | -2.51963900 | -1.16173300 |
| H | -3.01352800 | -3.42253800 | -1.02581000 |
| C | 2.00529100  | 1.60537100  | -2.16431000 |

|   |             |            |             |
|---|-------------|------------|-------------|
| C | 1.33585600  | 2.54385400 | -1.19058200 |
| H | 1.23991200  | 1.02245200 | -2.69418600 |
| H | 2.55596900  | 2.17492400 | -2.91786100 |
| C | 0.02768200  | 2.96441800 | -1.42262600 |
| C | -0.59292700 | 3.86122000 | -0.56013800 |
| C | 0.08458100  | 4.33363500 | 0.55879500  |
| C | 1.38896300  | 3.91225600 | 0.80168900  |
| C | 2.01328800  | 3.02902300 | -0.07215000 |
| H | -0.50893500 | 2.59323200 | -2.29146300 |
| H | -1.60976000 | 4.18405100 | -0.75862600 |
| H | -0.39993200 | 5.02652300 | 1.23876000  |
| H | 1.92454000  | 4.27838800 | 1.67155400  |
| H | 3.03349000  | 2.70773900 | 0.11387800  |

Man-4B\_ACN

Charge=+1, Multiplicity=+1

|   |             |             |             |
|---|-------------|-------------|-------------|
| C | 2.43416000  | -0.12698500 | -0.61756000 |
| C | 3.56788800  | -0.96695600 | -0.04070100 |
| C | 3.11496400  | -1.77389900 | 1.18118300  |
| O | 2.17725600  | -2.68419900 | 0.59752000  |
| H | 3.98306200  | -2.33310100 | 1.55189600  |
| C | 2.53388600  | -1.11424500 | 2.40702500  |
| C | 2.32944900  | -2.48536800 | -0.80765500 |
| C | 1.53778200  | -1.23015800 | -1.22441900 |
| O | 0.23561100  | -1.12930600 | -0.72740500 |
| H | 1.54482300  | -1.16710700 | -2.32094500 |
| O | 2.97626100  | 0.76361500  | -1.56232100 |
| H | 1.88072700  | 0.42584000  | 0.14391300  |
| O | 3.65359000  | -2.05811500 | -0.97852200 |
| H | 4.52377700  | -0.46020100 | 0.06125000  |
| H | 2.13072100  | -3.41300600 | -1.33867000 |
| O | 1.29957400  | -0.39617800 | 2.15809700  |
| H | 3.21703000  | -0.36662900 | 2.80616700  |
| H | 2.33293000  | -1.86680300 | 3.17097800  |
| C | 0.20307200  | -1.04762000 | 2.11285300  |
| C | -1.02713400 | -0.38223800 | 1.95907500  |
| H | 0.24090300  | -2.12819000 | 2.24598000  |
| C | -1.10166500 | 1.01513700  | 1.78358500  |

|   |             |             |             |
|---|-------------|-------------|-------------|
| C | -2.33854700 | 1.61001100  | 1.68582700  |
| C | -3.49728900 | 0.82850800  | 1.75379100  |
| C | -3.43077700 | -0.55227000 | 1.91656300  |
| C | -2.19678000 | -1.16465000 | 2.01334400  |
| H | -0.19455400 | 1.60626300  | 1.72388900  |
| H | -2.41554800 | 2.68135600  | 1.54653600  |
| H | -4.46650800 | 1.30842400  | 1.67082900  |
| H | -4.33788300 | -1.14231100 | 1.95170800  |
| H | -2.11957900 | -2.23991200 | 2.13405800  |
| C | -0.66777700 | -2.07150300 | -1.28465700 |
| C | -2.06157200 | -1.51276800 | -1.28701200 |
| H | -0.63205000 | -3.01235200 | -0.72132600 |
| H | -0.36388900 | -2.29456600 | -2.31751800 |
| C | -2.28042400 | -0.14898800 | -1.46578300 |
| C | -3.57494400 | 0.35170300  | -1.53064800 |
| C | -4.66470200 | -0.50661200 | -1.42227300 |
| C | -4.45162300 | -1.86915700 | -1.23840700 |
| C | -3.15618100 | -2.36821000 | -1.16594200 |
| H | -1.43002300 | 0.51928700  | -1.53226000 |
| H | -3.73292900 | 1.41780100  | -1.65972400 |
| H | -5.67515700 | -0.11431800 | -1.47015200 |
| H | -5.29577200 | -2.54383300 | -1.14001300 |
| H | -2.99324000 | -3.43087300 | -1.00962100 |
| C | 2.01265900  | 1.61504200  | -2.15559900 |
| C | 1.33463200  | 2.55112500  | -1.18553900 |
| H | 1.25235000  | 1.02932600  | -2.68929600 |
| H | 2.56492500  | 2.18669700  | -2.90649900 |
| C | 0.02795800  | 2.97098000  | -1.42826000 |
| C | -0.60163300 | 3.86389700  | -0.56814900 |
| C | 0.06540400  | 4.33343100  | 0.55848500  |
| C | 1.36803800  | 3.91273000  | 0.81183900  |
| C | 2.00136200  | 3.03301900  | -0.05931700 |
| H | -0.50102600 | 2.60070600  | -2.30211400 |
| H | -1.61835000 | 4.18322900  | -0.77281000 |
| H | -0.42745500 | 5.02075900  | 1.23811400  |
| H | 1.89424700  | 4.27351800  | 1.68959000  |
| H | 3.01889100  | 2.70971600  | 0.13718700  |

Man-4B\_DMSO

Charge=+1, Multiplicity=+1

|   |             |             |             |
|---|-------------|-------------|-------------|
| C | 2.43464600  | -0.12735100 | -0.61631300 |
| C | 3.56742800  | -0.96857800 | -0.03951600 |
| C | 3.11337000  | -1.77644500 | 1.18130600  |
| O | 2.17551600  | -2.68575400 | 0.59617300  |
| H | 3.98095100  | -2.33647200 | 1.55192400  |
| C | 2.53208000  | -1.11771900 | 2.40751000  |
| C | 2.32835500  | -2.48550100 | -0.80860200 |
| C | 1.53777100  | -1.22932900 | -1.22456400 |
| O | 0.23536200  | -1.12803500 | -0.72832200 |
| H | 1.54548300  | -1.16536900 | -2.32104500 |
| O | 2.97805300  | 0.76338100  | -1.56036600 |
| H | 1.88136700  | 0.42547600  | 0.14525200  |
| O | 3.65295100  | -2.05885300 | -0.97850200 |
| H | 4.52355300  | -0.46251800 | 0.06362200  |
| H | 2.12925800  | -3.41239600 | -1.34075800 |
| O | 1.29852100  | -0.39845700 | 2.15836600  |
| H | 3.21555800  | -0.37107200 | 2.80785500  |
| H | 2.33007900  | -1.87098800 | 3.17045800  |
| C | 0.20127900  | -1.04857300 | 2.11384800  |
| C | -1.02810600 | -0.38175300 | 1.95930200  |
| H | 0.23765800  | -2.12906800 | 2.24799900  |
| C | -1.10085600 | 1.01557200  | 1.78275900  |
| C | -2.33697100 | 1.61191200  | 1.68408100  |
| C | -3.49670400 | 0.83189600  | 1.75224200  |
| C | -3.43193000 | -0.54881700 | 1.91617900  |
| C | -2.19870900 | -1.16266100 | 2.01388500  |
| H | -0.19299400 | 1.60554500  | 1.72309200  |
| H | -2.41263700 | 2.68323700  | 1.54394900  |
| H | -4.46529200 | 1.31295400  | 1.66851400  |
| H | -4.33976700 | -1.13772600 | 1.95153900  |
| H | -2.12280300 | -2.23789700 | 2.13547800  |
| C | -0.66764600 | -2.07033300 | -1.28612000 |
| C | -2.06172300 | -1.51236000 | -1.28787400 |
| H | -0.63134700 | -3.01152400 | -0.72344800 |
| H | -0.36377200 | -2.29245600 | -2.31919700 |
| C | -2.28149600 | -0.14889600 | -1.46811300 |

|   |             |             |             |
|---|-------------|-------------|-------------|
| C | -3.57633400 | 0.35107200  | -1.53228700 |
| C | -4.66554500 | -0.50771000 | -1.42185800 |
| C | -4.45156900 | -1.86991900 | -1.23656900 |
| C | -3.15577400 | -2.36820900 | -1.16469500 |
| H | -1.43153200 | 0.51976000  | -1.53633400 |
| H | -3.73498200 | 1.41695500  | -1.66230200 |
| H | -5.67625000 | -0.11596000 | -1.46901100 |
| H | -5.29525900 | -2.54490500 | -1.13633000 |
| H | -2.99210000 | -3.43054400 | -1.00696900 |
| C | 2.01530800  | 1.61526200  | -2.15441000 |
| C | 1.33677900  | 2.55147300  | -1.18483100 |
| H | 1.25527700  | 1.02987800  | -2.68882900 |
| H | 2.56843100  | 2.18680200  | -2.90477800 |
| C | 0.03047900  | 2.97188100  | -1.42870300 |
| C | -0.59960600 | 3.86477400  | -0.56891500 |
| C | 0.06654900  | 4.33372700  | 0.55850400  |
| C | 1.36877800  | 3.91244900  | 0.81300000  |
| C | 2.00261600  | 3.03275400  | -0.05781700 |
| H | -0.49787400 | 2.60192200  | -2.30306900 |
| H | -1.61611400 | 4.18430700  | -0.77430300 |
| H | -0.42682800 | 5.02080100  | 1.23801600  |
| H | 1.89418000  | 4.27250000  | 1.69153300  |
| H | 3.01971600  | 2.70878200  | 0.13976800  |

Man-4B\_Water

Charge=+1, Multiplicity=+1

|   |            |             |             |
|---|------------|-------------|-------------|
| C | 2.43537800 | -0.12823600 | -0.61451100 |
| C | 3.56655400 | -0.97142500 | -0.03757900 |
| C | 3.11060100 | -1.78043000 | 1.18173100  |
| O | 2.17239500 | -2.68812500 | 0.59451700  |
| H | 3.97729700 | -2.34179000 | 1.55232700  |
| C | 2.52913400 | -1.12268300 | 2.40831400  |
| C | 2.32634400 | -2.48602900 | -0.80971300 |
| C | 1.53760200 | -1.22837100 | -1.22470500 |
| O | 0.23485600 | -1.12618600 | -0.72957200 |
| H | 1.54628600 | -1.16318500 | -2.32111900 |
| O | 2.98103900 | 0.76239400  | -1.55759900 |
| H | 1.88233700 | 0.42484700  | 0.14701400  |



|   |             |             |             |
|---|-------------|-------------|-------------|
| O | 3.65170400  | -2.06056100 | -0.97813800 |
| H | 4.52311200  | -0.46655000 | 0.06727500  |
| H | 2.12659300  | -3.41189100 | -1.34339800 |
| O | 1.29672800  | -0.40154900 | 2.15871200  |
| H | 3.21319400  | -0.37741100 | 2.81017600  |
| H | 2.32550100  | -1.87669700 | 3.17004900  |
| C | 0.19838700  | -1.04970000 | 2.11514600  |
| C | -1.02977500 | -0.38074400 | 1.95956600  |
| H | 0.23261300  | -2.13009200 | 2.25071800  |
| C | -1.09990800 | 1.01652000  | 1.78160400  |
| C | -2.33489800 | 1.61500900  | 1.68165800  |
| C | -3.49608000 | 0.83716400  | 1.75007200  |
| C | -3.43386100 | -0.54346400 | 1.91559800  |
| C | -2.20177600 | -1.15945400 | 2.01457800  |
| H | -0.19094700 | 1.60480100  | 1.72199800  |
| H | -2.40862500 | 2.68631400  | 1.54039000  |
| H | -4.46374100 | 1.31990900  | 1.66529800  |
| H | -4.34276600 | -1.13071400 | 1.95122400  |
| H | -2.12775400 | -2.23466200 | 2.13737100  |
| C | -0.66774200 | -2.06856100 | -1.28801000 |
| C | -2.06214200 | -1.51148100 | -1.28910600 |
| H | -0.63081700 | -3.01013300 | -0.72607900 |
| H | -0.36386500 | -2.28964100 | -2.32132400 |
| C | -2.28305000 | -0.14843000 | -1.47129200 |
| C | -3.57828200 | 0.35065900  | -1.53462600 |
| C | -4.66682100 | -0.50867200 | -1.42155800 |
| C | -4.45174100 | -1.87045400 | -1.23439300 |
| C | -3.15551700 | -2.36780500 | -1.16321700 |
| H | -1.43362700 | 0.52067700  | -1.54178000 |
| H | -3.73773200 | 1.41626800  | -1.66588100 |
| H | -5.67783100 | -0.11758700 | -1.46780900 |
| H | -5.29486500 | -2.54580100 | -1.13176700 |
| H | -2.99094400 | -3.42971500 | -1.00362000 |
| C | 2.01995400  | 1.61534600  | -2.15284800 |
| C | 1.34064500  | 2.55169500  | -1.18396400 |
| H | 1.26035900  | 1.03079500  | -2.68874500 |
| H | 2.57476400  | 2.18674500  | -2.90209400 |
| C | 0.03493000  | 2.97298800  | -1.42952200 |

|   |             |            |             |
|---|-------------|------------|-------------|
| C | -0.59586200 | 3.86584100 | -0.57017700 |
| C | 0.06898100  | 4.33383100 | 0.55843700  |
| C | 1.37059400  | 3.91161900 | 0.81462500  |
| C | 2.00516400  | 3.03198200 | -0.05573300 |
| H | -0.49247800 | 2.60360800 | -2.30469900 |
| H | -1.61202300 | 4.18576700 | -0.77667400 |
| H | -0.42511800 | 5.02055300 | 1.23778500  |
| H | 1.89480900  | 4.27054600 | 1.69432200  |
| H | 3.02161600  | 2.70696600 | 0.14343600  |

Man-6B\_Dioxane

Charge=+1, Multiplicity=+1

|   |             |             |             |
|---|-------------|-------------|-------------|
| C | -0.29613700 | 3.11662400  | 0.57198400  |
| O | -0.79678300 | 2.52295300  | 1.75929800  |
| C | -2.08211000 | 2.11456200  | 1.33165400  |
| C | -1.94140900 | 0.91626700  | 0.31970300  |
| O | -2.56336300 | 1.16857800  | -0.90593700 |
| C | 0.18646000  | 2.00659200  | -0.35583300 |
| O | -0.16836300 | -0.22755700 | -0.97262200 |
| O | 1.62544100  | 1.82003900  | -0.16895500 |
| H | 0.51831100  | 3.79331800  | 0.82895200  |
| C | -1.54043700 | 3.84211600  | 0.01031300  |
| O | -2.62372100 | 3.23748800  | 0.70766800  |
| H | -2.67728000 | 1.86186700  | 2.20762600  |
| H | -1.65749000 | 3.70402900  | -1.06783200 |
| H | -1.52625600 | 4.90573900  | 0.25064500  |
| C | -3.96873200 | 0.92318100  | -0.91215000 |
| C | -4.28514700 | -0.52558600 | -0.66223900 |
| H | -4.29782100 | 1.22889200  | -1.90753300 |
| H | -4.47077500 | 1.56468000  | -0.17921000 |
| C | -5.03424000 | -0.91733600 | 0.44434500  |
| C | -5.29185800 | -2.26429100 | 0.68451100  |
| C | -4.79445700 | -3.23046300 | -0.18093200 |
| C | -4.04490500 | -2.84703000 | -1.29077000 |
| C | -3.79319200 | -1.50324000 | -1.52946200 |
| H | -5.42174800 | -0.16176800 | 1.12252700  |
| H | -5.87893600 | -2.55751100 | 1.54838500  |
| H | -4.99401700 | -4.28066800 | 0.00376800  |

|   |             |             |             |
|---|-------------|-------------|-------------|
| H | -3.66378900 | -3.59940200 | -1.97361500 |
| H | -3.20706200 | -1.20126400 | -2.39234900 |
| C | -0.24046200 | -1.60500400 | -0.57188800 |
| C | 0.91908600  | -1.99089200 | 0.29874100  |
| H | -1.19809800 | -1.79647200 | -0.07723900 |
| H | -0.23204500 | -2.16327700 | -1.50917300 |
| C | 2.15006200  | -2.30221700 | -0.28116100 |
| C | 3.25300200  | -2.59070200 | 0.51062500  |
| C | 3.13768700  | -2.56780300 | 1.89726200  |
| C | 1.91290100  | -2.27578300 | 2.48639800  |
| C | 0.80819700  | -1.99422700 | 1.68938400  |
| H | 2.23897700  | -2.32646800 | -1.36367600 |
| H | 4.20214600  | -2.84061100 | 0.04830100  |
| H | 3.99802500  | -2.79439700 | 2.51805400  |
| H | 1.81468200  | -2.27580500 | 3.56664400  |
| H | -0.15344700 | -1.79094000 | 2.15290000  |
| C | 2.26545700  | 1.17324000  | -1.05955500 |
| C | -0.45449900 | 0.69163000  | 0.04271600  |
| H | 0.01869800  | 2.23342900  | -1.41100500 |
| H | 0.01446300  | 0.38787100  | 0.98622500  |
| C | 3.58776200  | 0.73685400  | -0.83179400 |
| C | 4.20685800  | 0.88068100  | 0.42597000  |
| C | 5.48985000  | 0.40977000  | 0.60054800  |
| C | 6.15707600  | -0.20293300 | -0.46386700 |
| C | 5.54891500  | -0.35405400 | -1.70943300 |
| C | 4.26261100  | 0.11083500  | -1.89728000 |
| H | 3.76774700  | -0.00161000 | -2.85623200 |
| H | 7.16622200  | -0.57295900 | -0.31616600 |
| H | 6.08143200  | -0.83521000 | -2.52086600 |
| H | 3.66627200  | 1.34768800  | 1.24062700  |
| H | 5.97916500  | 0.50559900  | 1.56242400  |
| H | 1.76910500  | 0.97659400  | -2.01015500 |
| H | -2.35220000 | 0.01192900  | 0.78560100  |

Man-6B\_Toluene

Charge=+1, Multiplicity=+1

|   |            |             |             |
|---|------------|-------------|-------------|
| C | 1.42110300 | -3.44692400 | -0.15732600 |
| O | 1.95138600 | -3.24038500 | 1.14433000  |

|   |             |             |             |
|---|-------------|-------------|-------------|
| C | 3.01730500  | -2.35088900 | 0.86265800  |
| C | 2.42578700  | -0.94364100 | 0.46221400  |
| O | 2.87029900  | -0.52181800 | -0.79408400 |
| C | 0.57079800  | -2.23491200 | -0.52905800 |
| O | 0.19690300  | 0.01530100  | -0.07839100 |
| O | -0.84762700 | -2.49370100 | -0.31232800 |
| H | 0.83153400  | -4.36330300 | -0.16196300 |
| C | 2.70174400  | -3.53309600 | -1.01876500 |
| O | 3.70143600  | -2.93824100 | -0.19730300 |
| H | 3.66815200  | -2.29980800 | 1.73405400  |
| H | 2.61402400  | -2.98833100 | -1.96208900 |
| H | 2.98468200  | -4.56856300 | -1.21179400 |
| C | 3.90870000  | 0.45767700  | -0.76406000 |
| C | 3.39440200  | 1.78652800  | -0.28650900 |
| H | 4.26356200  | 0.52135900  | -1.79403500 |
| H | 4.73990300  | 0.10997600  | -0.13970400 |
| C | 2.54023200  | 2.53270500  | -1.10131800 |
| C | 1.99869300  | 3.72792900  | -0.64967200 |
| C | 2.30263800  | 4.19264200  | 0.62792400  |
| C | 3.15797600  | 3.46251700  | 1.44366300  |
| C | 3.70235900  | 2.26534100  | 0.98534800  |
| H | 2.29957400  | 2.16625100  | -2.09497600 |
| H | 1.33855900  | 4.30181700  | -1.29130400 |
| H | 1.87759000  | 5.12595100  | 0.98125300  |
| H | 3.40561200  | 3.82485500  | 2.43570200  |
| H | 4.37922400  | 1.70175000  | 1.62192300  |
| C | -0.10780900 | 1.03695600  | 0.87204600  |
| C | -1.31149200 | 1.77947500  | 0.37640100  |
| H | -0.31594400 | 0.58448300  | 1.84925100  |
| H | 0.75939800  | 1.70065500  | 0.97200700  |
| C | -1.36207200 | 2.23132400  | -0.94340600 |
| C | -2.48408100 | 2.90202200  | -1.41289400 |
| C | -3.56387200 | 3.13648300  | -0.56536100 |
| C | -3.51731700 | 2.69150300  | 0.75025900  |
| C | -2.39729500 | 2.01049900  | 1.21611800  |
| H | -0.51672400 | 2.05420800  | -1.59992100 |
| H | -2.51341300 | 3.25335800  | -2.43921600 |
| H | -4.43649400 | 3.66799400  | -0.93008000 |

|   |             |             |             |
|---|-------------|-------------|-------------|
| H | -4.35621800 | 2.86844600  | 1.41498100  |
| H | -2.36910600 | 1.65378700  | 2.24156700  |
| C | -1.65442800 | -1.63216100 | -0.80743900 |
| C | 0.90550300  | -1.08427000 | 0.40264900  |
| H | 0.69601700  | -1.93883400 | -1.57312200 |
| H | 0.55194800  | -1.35519000 | 1.40496200  |
| C | -2.98565700 | -1.52812300 | -0.35138000 |
| C | -3.47363100 | -2.31722900 | 0.71066600  |
| C | -4.77367900 | -2.14439400 | 1.13182600  |
| C | -5.58611300 | -1.18969500 | 0.51046700  |
| C | -5.10718000 | -0.39992600 | -0.53197000 |
| C | -3.80685500 | -0.56460700 | -0.96741300 |
| H | -3.40458900 | 0.05820300  | -1.75957100 |
| H | -6.60724100 | -1.05898200 | 0.85273800  |
| H | -5.74680200 | 0.34279100  | -0.99277100 |
| H | -2.82492000 | -3.04619700 | 1.18232300  |
| H | -5.16805300 | -2.74339500 | 1.94410200  |
| H | -1.29973800 | -0.99280700 | -1.61380800 |
| H | 2.67575000  | -0.21212600 | 1.23767900  |

Man-6B\_Et<sub>2</sub>O

Charge=+1, Multiplicity=+1

|   |             |             |             |
|---|-------------|-------------|-------------|
| C | -0.35098200 | 3.09539800  | 0.47173800  |
| O | -0.88592900 | 2.56954700  | 1.67808300  |
| C | -2.16470500 | 2.14958000  | 1.24315100  |
| C | -2.01219300 | 0.89776800  | 0.30250600  |
| O | -2.61607600 | 1.08324800  | -0.94549400 |
| C | 0.14299900  | 1.93466100  | -0.38512600 |
| O | -0.24191300 | -0.32509200 | -0.90457000 |
| O | 1.57312400  | 1.75224500  | -0.15086600 |
| H | 0.46386300  | 3.77746100  | 0.71135900  |
| C | -1.57348000 | 3.80076400  | -0.15622900 |
| O | -2.68016600 | 3.24404600  | 0.54715800  |
| H | -2.78399100 | 1.94959600  | 2.11587600  |
| H | -1.66634200 | 3.60627500  | -1.22769300 |
| H | -1.55292000 | 4.87537000  | 0.02723100  |
| C | -4.02233000 | 0.85563700  | -0.95357300 |
| C | -4.36846900 | -0.56817100 | -0.61004600 |

|   |             |             |             |
|---|-------------|-------------|-------------|
| H | -4.33584300 | 1.09695000  | -1.97179800 |
| H | -4.52655500 | 1.55145000  | -0.27350300 |
| C | -5.21992100 | -0.86294600 | 0.45171800  |
| C | -5.51990200 | -2.18406500 | 0.77324600  |
| C | -4.95970800 | -3.22156000 | 0.03822300  |
| C | -4.10347300 | -2.93511600 | -1.02285300 |
| C | -3.81241500 | -1.61685200 | -1.34565100 |
| H | -5.65082900 | -0.05220400 | 1.03273300  |
| H | -6.18608000 | -2.40130800 | 1.60158000  |
| H | -5.18935000 | -4.25189700 | 0.28868500  |
| H | -3.66771600 | -3.74330400 | -1.60127300 |
| H | -3.14212900 | -1.39076900 | -2.16934300 |
| C | -0.23770600 | -1.67221200 | -0.40905800 |
| C | 1.04593600  | -1.99120500 | 0.29999700  |
| H | -1.10664200 | -1.83365200 | 0.23734400  |
| H | -0.35938200 | -2.29709000 | -1.29469800 |
| C | 2.16394400  | -2.38962100 | -0.43511400 |
| C | 3.37868100  | -2.62473900 | 0.19528700  |
| C | 3.49216700  | -2.45311600 | 1.57121900  |
| C | 2.38253900  | -2.06796100 | 2.31565700  |
| C | 1.16386700  | -1.84726400 | 1.68323100  |
| H | 2.07706900  | -2.52058300 | -1.51026800 |
| H | 4.23863900  | -2.94082500 | -0.38540100 |
| H | 4.44185200  | -2.63165400 | 2.06423500  |
| H | 2.46249800  | -1.95000600 | 3.39109100  |
| H | 0.29267500  | -1.57752500 | 2.27378100  |
| C | 2.25058500  | 1.10829900  | -1.01515300 |
| C | -0.52254800 | 0.64753800  | 0.06150900  |
| H | 0.00358900  | 2.11021500  | -1.45360300 |
| H | -0.07188500 | 0.38363400  | 1.02501500  |
| C | 3.58259200  | 0.72482300  | -0.75529300 |
| C | 4.30432200  | 0.12145400  | -1.80293700 |
| C | 5.61054200  | -0.27164200 | -1.59113800 |
| C | 6.19127100  | -0.07499400 | -0.33897900 |
| C | 5.47692100  | 0.51300100  | 0.70831500  |
| C | 4.17368900  | 0.91457800  | 0.50986500  |
| H | 3.59802600  | 1.36298600  | 1.31079500  |
| H | 7.21621400  | -0.38899700 | -0.17243700 |

|   |             |             |             |
|---|-------------|-------------|-------------|
| H | 5.94588300  | 0.64573900  | 1.67588300  |
| H | 3.82948900  | -0.02933000 | -2.76655600 |
| H | 6.17882200  | -0.73339500 | -2.38941600 |
| H | 1.77997700  | 0.87665400  | -1.97110300 |
| H | -2.43459900 | 0.02202700  | 0.80992600  |

Man-6B\_CHCl<sub>3</sub>

Charge=+1, Multiplicity=+1

|   |             |             |             |
|---|-------------|-------------|-------------|
| C | -0.34890000 | 3.09570300  | 0.47204100  |
| O | -0.88481600 | 2.57029300  | 1.67839600  |
| C | -2.16368000 | 2.15111100  | 1.24312100  |
| C | -2.01185600 | 0.89905700  | 0.30283700  |
| O | -2.61685600 | 1.08420300  | -0.94484300 |
| C | 0.14459400  | 1.93473700  | -0.38466100 |
| O | -0.24303500 | -0.32457200 | -0.90525100 |
| O | 1.57416800  | 1.75091900  | -0.14940400 |
| H | 0.46630600  | 3.77720300  | 0.71183800  |
| C | -1.57057800 | 3.80189300  | -0.15631200 |
| O | -2.67813600 | 3.24604500  | 0.54680200  |
| H | -2.78342300 | 1.95155300  | 2.11559900  |
| H | -1.66318100 | 3.60744700  | -1.22776800 |
| H | -1.54917700 | 4.87648600  | 0.02703600  |
| C | -4.02300700 | 0.85668200  | -0.95146100 |
| C | -4.36891600 | -0.56758200 | -0.60935500 |
| H | -4.33788400 | 1.09919000  | -1.96898800 |
| H | -4.52649200 | 1.55151100  | -0.26984000 |
| C | -3.81363900 | -1.61536400 | -1.34684400 |
| C | -4.10442200 | -2.93406000 | -1.02546100 |
| C | -4.95969100 | -3.22183300 | 0.03606900  |
| C | -5.51910000 | -2.18521300 | 0.77299600  |
| C | -5.21933400 | -0.86367400 | 0.45289200  |
| H | -3.14396500 | -1.38836600 | -2.17076800 |
| H | -3.66891300 | -3.74147500 | -1.60514900 |
| H | -5.18896100 | -4.25249900 | 0.28557100  |
| H | -6.18428200 | -2.40347500 | 1.60187500  |
| H | -5.64930400 | -0.05365500 | 1.03559200  |
| C | -0.23943900 | -1.67168600 | -0.40985500 |
| C | 1.04387300  | -1.99136200 | 0.29956000  |

|   |             |             |             |
|---|-------------|-------------|-------------|
| H | -1.10847900 | -1.83288100 | 0.23646900  |
| H | -0.36106500 | -2.29645500 | -1.29557900 |
| C | 1.16097600  | -1.84921500 | 1.68304800  |
| C | 2.37936000  | -2.07068400 | 2.31586500  |
| C | 3.48944300  | -2.45476600 | 1.57152600  |
| C | 3.37679100  | -2.62435100 | 0.19524700  |
| C | 2.16238100  | -2.38846900 | -0.43552000 |
| H | 0.28954600  | -1.57967700 | 2.27333800  |
| H | 2.45883300  | -1.95369100 | 3.39144300  |
| H | 4.43898800  | -2.63342800 | 2.06477800  |
| H | 4.23725700  | -2.93884500 | -0.38554800 |
| H | 2.07629800  | -2.51720500 | -1.51098500 |
| C | 2.25216000  | 1.10927700  | -1.01497000 |
| C | -0.52244800 | 0.64809400  | 0.06123300  |
| H | 0.00618500  | 2.11108000  | -1.45310800 |
| H | -0.07197800 | 0.38325100  | 1.02454700  |
| C | 3.58390100  | 0.72488200  | -0.75519000 |
| C | 4.30575200  | 0.12299600  | -1.80358900 |
| C | 5.61153100  | -0.27158400 | -1.59164100 |
| C | 6.19163600  | -0.07772700 | -0.33877200 |
| C | 5.47715600  | 0.50900300  | 0.70917400  |
| C | 4.17436600  | 0.91195800  | 0.51066200  |
| H | 3.59860600  | 1.35937300  | 1.31207200  |
| H | 7.21616100  | -0.39302000 | -0.17213900 |
| H | 5.94566200  | 0.63952500  | 1.67726200  |
| H | 3.83136100  | -0.02551400 | -2.76775900 |
| H | 6.17988400  | -0.73244000 | -2.39037900 |
| H | 1.78213900  | 0.88025200  | -1.97177700 |
| H | -2.43417100 | 0.02369900  | 0.81091400  |

Man-6B\_DCM

Charge=+1, Multiplicity=+1

|   |             |            |             |
|---|-------------|------------|-------------|
| C | -0.32292000 | 3.10004200 | 0.48818700  |
| O | -0.85622400 | 2.57057200 | 1.69498800  |
| C | -2.13898900 | 2.15974000 | 1.26411500  |
| C | -1.99839700 | 0.91286100 | 0.31566700  |
| O | -2.61252600 | 1.10839200 | -0.92690500 |
| C | 0.16012400  | 1.94212300 | -0.37833500 |



|   |             |             |             |
|---|-------------|-------------|-------------|
| O | -0.24334200 | -0.31344300 | -0.90881700 |
| O | 1.58941500  | 1.74905300  | -0.15225200 |
| H | 0.49692200  | 3.77584400  | 0.72730200  |
| C | -1.54388000 | 3.81625100  | -0.12923900 |
| O | -2.65169300 | 3.26240700  | 0.57725900  |
| H | -2.75514900 | 1.95702700  | 2.13829300  |
| H | -1.64317600 | 3.62821200  | -1.20101700 |
| H | -1.51524900 | 4.88963000  | 0.05964000  |
| C | -4.01743800 | 0.87771400  | -0.92491700 |
| C | -4.35677700 | -0.55602200 | -0.61623000 |
| H | -4.34417100 | 1.14468200  | -1.93261500 |
| H | -4.51643600 | 1.55291900  | -0.22058500 |
| C | -3.80467800 | -1.58277100 | -1.38506200 |
| C | -4.09090000 | -2.91030000 | -1.09725200 |
| C | -4.93842100 | -3.22808400 | -0.03794100 |
| C | -5.49403100 | -2.21240500 | 0.73069500  |
| C | -5.19886500 | -0.88204700 | 0.44399900  |
| H | -3.13999000 | -1.33313600 | -2.20637000 |
| H | -3.65629100 | -3.70074900 | -1.70054000 |
| H | -5.16346800 | -4.26559000 | 0.18596500  |
| H | -6.15187000 | -2.45401500 | 1.55900000  |
| H | -5.62465500 | -0.08886900 | 1.05226800  |
| C | -0.25442100 | -1.66259300 | -0.41975200 |
| C | 1.00938700  | -1.99040800 | 0.32047700  |
| H | -1.13918300 | -1.82487600 | 0.20468300  |
| H | -0.35526000 | -2.28193600 | -1.31182500 |
| C | 1.08443300  | -1.87649900 | 1.70929600  |
| C | 2.28437000  | -2.10779800 | 2.37385700  |
| C | 3.41810700  | -2.47045600 | 1.65479000  |
| C | 3.34786300  | -2.60884500 | 0.27192200  |
| C | 2.15140300  | -2.36567400 | -0.38957500 |
| H | 0.19538100  | -1.61745500 | 2.27747500  |
| H | 2.33172400  | -2.01166700 | 3.45338300  |
| H | 4.35396300  | -2.65386700 | 2.17199100  |
| H | 4.22780600  | -2.90293400 | -0.29019900 |
| H | 2.09819500  | -2.46880600 | -1.46978900 |
| C | 2.25964700  | 1.11722900  | -1.03090700 |
| C | -0.51184200 | 0.65664700  | 0.06361300  |

|   |             |             |             |
|---|-------------|-------------|-------------|
| H | 0.01752800  | 2.12816200  | -1.44447400 |
| H | -0.05837300 | 0.38364100  | 1.02314500  |
| C | 3.59073100  | 0.72202700  | -0.78378200 |
| C | 4.29644000  | 0.11263600  | -1.83875700 |
| C | 5.59725800  | -0.30320800 | -1.63573500 |
| C | 6.18852700  | -0.12102200 | -0.38643300 |
| C | 5.49062300  | 0.47615200  | 0.66707700  |
| C | 4.19304600  | 0.89944800  | 0.47779700  |
| H | 3.63012200  | 1.35504800  | 1.28369300  |
| H | 7.20865000  | -0.45365900 | -0.22683800 |
| H | 5.96787500  | 0.59826400  | 1.63196300  |
| H | 3.81319500  | -0.02648200 | -2.79983700 |
| H | 6.15279000  | -0.77199400 | -2.43882900 |
| H | 1.78264600  | 0.90174300  | -1.98706900 |
| H | -2.42096500 | 0.03657800  | 0.82155400  |

Man-6B\_ACN

Charge=+1, Multiplicity=+1

|   |             |             |             |
|---|-------------|-------------|-------------|
| C | -1.23827500 | -3.46155300 | 0.09319900  |
| O | -1.79316300 | -3.27903000 | -1.20489500 |
| C | -2.91763200 | -2.47204900 | -0.90701800 |
| C | -2.42967600 | -1.03219800 | -0.49101300 |
| O | -2.92170300 | -0.65518300 | 0.76542500  |
| C | -0.47718300 | -2.19729400 | 0.48088900  |
| O | -0.28789400 | 0.09171700  | 0.06993400  |
| O | 0.95210200  | -2.35756700 | 0.25528100  |
| H | -0.58261300 | -4.33082100 | 0.08335300  |
| C | -2.50153700 | -3.65556000 | 0.95942700  |
| O | -3.55176700 | -3.12829500 | 0.14888100  |
| H | -3.57691000 | -2.45443100 | -1.77286800 |
| H | -2.44757900 | -3.11751900 | 1.90856900  |
| H | -2.70223100 | -4.71165100 | 1.14194700  |
| C | -4.00622300 | 0.26974200  | 0.73251300  |
| C | -3.54879800 | 1.65063200  | 0.35082400  |
| H | -4.41346600 | 0.26352100  | 1.74540300  |
| H | -4.78704600 | -0.08334400 | 0.04910600  |
| C | -3.83746300 | 2.18518500  | -0.90340200 |
| C | -3.35598100 | 3.44070900  | -1.26762500 |

|   |             |             |             |
|---|-------------|-------------|-------------|
| C | -2.58484900 | 4.17413400  | -0.37405200 |
| C | -2.29994400 | 3.65172800  | 0.88628200  |
| C | -2.77721400 | 2.39809100  | 1.24367400  |
| H | -4.44615100 | 1.61725100  | -1.60147000 |
| H | -3.58357200 | 3.84303700  | -2.24915800 |
| H | -2.20726500 | 5.15168900  | -0.65495300 |
| H | -1.70487200 | 4.22598100  | 1.58883300  |
| H | -2.54645600 | 1.98741200  | 2.22219000  |
| C | -0.06153600 | 1.13969900  | -0.88066400 |
| C | 1.22917700  | 1.81364500  | -0.52820500 |
| H | -0.00513200 | 0.71643700  | -1.88903200 |
| H | -0.90489500 | 1.83674100  | -0.84088100 |
| C | 1.34809500  | 2.51283000  | 0.67389700  |
| C | 2.55875500  | 3.09188100  | 1.03329400  |
| C | 3.66074400  | 2.98605000  | 0.18869200  |
| C | 3.54784300  | 2.29573600  | -1.01278800 |
| C | 2.33759400  | 1.70826300  | -1.36617400 |
| H | 0.48722900  | 2.59779400  | 1.32948900  |
| H | 2.64314400  | 3.63028300  | 1.97160800  |
| H | 4.60638200  | 3.43768000  | 0.46983900  |
| H | 4.40584900  | 2.20259400  | -1.67022200 |
| H | 2.25502500  | 1.15694600  | -2.29826400 |
| C | 1.71246200  | -1.50917500 | 0.83209400  |
| C | -0.90247900 | -1.05785200 | -0.42588800 |
| H | -0.61396900 | -1.93850100 | 1.53270200  |
| H | -0.53039700 | -1.28279400 | -1.43237200 |
| C | 3.06212700  | -1.35314500 | 0.45228600  |
| C | 3.61076100  | -2.04089400 | -0.64905000 |
| C | 4.93043700  | -1.82786400 | -0.98155800 |
| C | 5.70425700  | -0.93814200 | -0.22808000 |
| C | 5.16567900  | -0.25102700 | 0.85646900  |
| C | 3.84210900  | -0.45081600 | 1.19910300  |
| H | 3.39570500  | 0.08853500  | 2.02753500  |
| H | 6.74178800  | -0.77589100 | -0.50010000 |
| H | 5.77568100  | 0.44436700  | 1.41983300  |
| H | 2.99113600  | -2.72078500 | -1.22183200 |
| H | 5.36996500  | -2.34471800 | -1.82631400 |
| H | 1.30174300  | -0.92076900 | 1.65046100  |

|   |             |             |             |
|---|-------------|-------------|-------------|
| H | -2.72918600 | -0.31670900 | -1.26316100 |
|---|-------------|-------------|-------------|

Man-6B\_DMSO

Charge=+1, Multiplicity=+1

|   |             |             |             |
|---|-------------|-------------|-------------|
| C | -0.32085800 | 3.10166000  | 0.46766000  |
| O | -0.86071000 | 2.59110600  | 1.68082100  |
| C | -2.14477400 | 2.18217100  | 1.25301400  |
| C | -2.01030200 | 0.92261200  | 0.32120800  |
| O | -2.62753200 | 1.10509000  | -0.92288700 |
| C | 0.15721800  | 1.93039000  | -0.38316900 |
| O | -0.26685400 | -0.32850200 | -0.89121200 |
| O | 1.58337500  | 1.73149000  | -0.14864800 |
| H | 0.50247100  | 3.77546600  | 0.69938700  |
| C | -1.53569800 | 3.81696900  | -0.16158800 |
| O | -2.64933400 | 3.28037400  | 0.55122400  |
| H | -2.76402700 | 1.99371300  | 2.12811500  |
| H | -1.63378800 | 3.61422500  | -1.23060900 |
| H | -1.49995000 | 4.89272500  | 0.01147500  |
| C | -4.03120200 | 0.87134500  | -0.91394100 |
| C | -4.36638700 | -0.56371500 | -0.60524800 |
| H | -4.36476000 | 1.13867700  | -1.91940400 |
| H | -4.52857700 | 1.54350300  | -0.20541600 |
| C | -3.81136900 | -1.58924800 | -1.37371100 |
| C | -4.09355700 | -2.91762800 | -1.08520400 |
| C | -4.94036500 | -3.23755600 | -0.02576900 |
| C | -5.49909900 | -2.22295100 | 0.74237200  |
| C | -5.20762600 | -0.89178800 | 0.45512500  |
| H | -3.14671600 | -1.33894600 | -2.19476000 |
| H | -3.65484900 | -3.70681400 | -1.68718100 |
| H | -5.16116100 | -4.27572100 | 0.19957300  |
| H | -6.15504100 | -2.46592100 | 1.57185600  |
| H | -5.63383100 | -0.09960400 | 1.06426700  |
| C | -0.26759200 | -1.67056700 | -0.38389300 |
| C | 1.01398800  | -1.99027400 | 0.32944200  |
| H | -1.13610300 | -1.82327200 | 0.26528200  |
| H | -0.39068100 | -2.30239000 | -1.26443000 |
| C | 1.12389400  | -1.85730100 | 1.71443400  |
| C | 2.34021100  | -2.08067100 | 2.35160200  |

|   |             |             |             |
|---|-------------|-------------|-------------|
| C | 3.45520000  | -2.45558700 | 1.60960600  |
| C | 3.34997000  | -2.61313100 | 0.23096900  |
| C | 2.13762900  | -2.37667300 | -0.40386600 |
| H | 0.25020000  | -1.58739200 | 2.30110000  |
| H | 2.41532200  | -1.96680300 | 3.42788200  |
| H | 4.40439600  | -2.63008800 | 2.10515600  |
| H | 4.21576000  | -2.91319900 | -0.34961200 |
| H | 2.05873300  | -2.49018700 | -1.48140000 |
| C | 2.25984700  | 1.10743400  | -1.02767800 |
| C | -0.52538100 | 0.65465900  | 0.07108400  |
| H | 0.02016900  | 2.10683400  | -1.45152300 |
| H | -0.07436700 | 0.38783600  | 1.03331000  |
| C | 3.59154500  | 0.71666400  | -0.77671300 |
| C | 4.18810600  | 0.89245600  | 0.48776800  |
| C | 5.48716000  | 0.47492200  | 0.68017700  |
| C | 6.19159900  | -0.11526600 | -0.37296800 |
| C | 5.60581200  | -0.29554300 | -1.62506200 |
| C | 4.30368000  | 0.11494700  | -1.83174400 |
| H | 3.82446600  | -0.02296500 | -2.79496400 |
| H | 7.21242800  | -0.44427400 | -0.21060300 |
| H | 6.16617200  | -0.75939000 | -2.42764600 |
| H | 3.61992500  | 1.34241800  | 1.29310900  |
| H | 5.96029800  | 0.59551800  | 1.64726500  |
| H | 1.78852300  | 0.89429600  | -1.98689400 |
| H | -2.43646500 | 0.05529700  | 0.83884100  |

Man-6B\_Water

Charge=+1, Multiplicity=+1

|   |             |             |             |
|---|-------------|-------------|-------------|
| C | -0.31963000 | 3.10246900  | 0.46630800  |
| O | -0.85948000 | 2.59403300  | 1.68046300  |
| C | -2.14400200 | 2.18545800  | 1.25375800  |
| C | -2.01085000 | 0.92463500  | 0.32349400  |
| O | -2.62840300 | 1.10633000  | -0.92068900 |
| C | 0.15702200  | 1.92967600  | -0.38326100 |
| O | -0.26916000 | -0.32986500 | -0.88754200 |
| O | 1.58313600  | 1.73016900  | -0.14961800 |
| H | 0.50441800  | 3.77581500  | 0.69671000  |
| C | -1.53408400 | 3.81805700  | -0.16323800 |

|   |             |             |             |
|---|-------------|-------------|-------------|
| O | -2.64800700 | 3.28326900  | 0.55076000  |
| H | -2.76302600 | 1.99849800  | 2.12933600  |
| H | -1.63276000 | 3.61412900  | -1.23195700 |
| H | -1.49728200 | 4.89398700  | 0.00849200  |
| C | -4.03178300 | 0.87149800  | -0.91128200 |
| C | -4.36567900 | -0.56449500 | -0.60533700 |
| H | -4.36638500 | 1.14060500  | -1.91594000 |
| H | -4.52928100 | 1.54168500  | -0.20095500 |
| C | -5.20663900 | -0.89531200 | 0.45441400  |
| C | -5.49713900 | -2.22726600 | 0.73902200  |
| C | -4.93770900 | -3.23995100 | -0.03117700 |
| C | -4.09115400 | -2.91727100 | -1.08999500 |
| C | -3.80993300 | -1.58809900 | -1.37585200 |
| H | -5.63321600 | -0.10466500 | 1.06527000  |
| H | -6.15274000 | -2.47234200 | 1.56816100  |
| H | -5.15763500 | -4.27873300 | 0.19218100  |
| H | -3.65170900 | -3.70489700 | -1.69347400 |
| H | -3.14542200 | -1.33582100 | -2.19639500 |
| C | -0.26970000 | -1.67095300 | -0.37776600 |
| C | 1.01267600  | -1.98986900 | 0.33456100  |
| H | -1.13733000 | -1.82213600 | 0.27295700  |
| H | -0.39415800 | -2.30437200 | -1.25696700 |
| C | 2.13560500  | -2.37688800 | -0.39954500 |
| C | 3.34861800  | -2.61260300 | 0.23430600  |
| C | 3.45524100  | -2.45374300 | 1.61270500  |
| C | 2.34097700  | -2.07815100 | 2.35546500  |
| C | 1.12398100  | -1.85545400 | 1.71930500  |
| H | 2.05571900  | -2.49107000 | -1.47692800 |
| H | 4.21391200  | -2.91282900 | -0.34693600 |
| H | 4.40504000  | -2.62740100 | 2.10740200  |
| H | 2.41724300  | -1.96292400 | 3.43152200  |
| H | 0.25094900  | -1.58463000 | 2.30652600  |
| C | 2.25886000  | 1.10614100  | -1.02920500 |
| C | -0.52624800 | 0.65512500  | 0.07328300  |
| H | 0.01922900  | 2.10493400  | -1.45170000 |
| H | -0.07510200 | 0.38941800  | 1.03573500  |
| C | 3.59087500  | 0.71557400  | -0.77948800 |
| C | 4.18903000  | 0.89263800  | 0.48405000  |

|   |             |             |             |
|---|-------------|-------------|-------------|
| C | 5.48811600  | 0.47472100  | 0.67541300  |
| C | 6.19100100  | -0.11711100 | -0.37786800 |
| C | 5.60366800  | -0.29847400 | -1.62906500 |
| C | 4.30148700  | 0.11245900  | -1.83473700 |
| H | 3.82103600  | -0.02638400 | -2.79720300 |
| H | 7.21181200  | -0.44654700 | -0.21628600 |
| H | 6.16281500  | -0.76359200 | -2.43175700 |
| H | 3.62203400  | 1.34388200  | 1.28950500  |
| H | 5.96246900  | 0.59623400  | 1.64178900  |
| H | 1.78668900  | 0.89250200  | -1.98786200 |
| H | -2.43765300 | 0.05829800  | 0.84216600  |
