# Supplementary material for: Mechanistic insight into benzylidene-directed glycosylation reactions using cryogenic infrared spectroscopy
Source: PubMed Central journal article supplement (PMC11549046; doi:10.1038/s44160-024-00619-0), 2024-07-26
Supplement: 44160_2024_619_MOESM4_ESM.pdf [file 44160_2024_619_MOESM4_ESM.pdf]

**Beta Glucosyl triflate****Charge=0, Multiplicity=+1**

|   |             |             |             |
|---|-------------|-------------|-------------|
| O | -0.25486800 | -1.37027000 | 1.47268100  |
| C | -1.53812400 | -0.74910300 | 1.46066100  |
| C | -1.67514400 | 0.29550800  | 0.35904700  |
| C | -0.71137800 | 1.43075200  | 0.64139700  |
| O | -2.99705900 | 0.78306100  | 0.37173500  |
| C | 0.66733400  | 0.87224600  | 1.06319800  |
| H | -1.10207200 | 1.95991200  | 1.51453300  |
| O | -0.66962800 | 2.40644300  | -0.37372600 |
| C | 0.77479100  | -0.64897300 | 0.94393500  |
| O | 0.92400800  | 1.22551500  | 2.40403000  |
| H | 1.43054500  | 1.28624400  | 0.40125500  |
| H | 1.70564600  | -1.01918700 | 1.37035500  |
| C | -2.59295000 | -1.82070600 | 1.25052600  |
| H | -1.70176100 | -0.25786100 | 2.42758900  |
| O | -3.86451900 | -1.21167400 | 1.18292400  |
| H | -2.61312000 | -2.52929500 | 2.07948200  |
| H | -2.37332900 | -2.36855000 | 0.32169200  |
| H | -1.46631400 | -0.17538400 | -0.61329200 |
| C | -3.91695200 | -0.25550500 | 0.15692400  |
| C | -5.30208300 | 0.31715400  | 0.07104300  |
| H | -3.64499100 | -0.75904200 | -0.79168700 |
| C | -6.40356500 | -0.46919400 | 0.39697300  |
| C | -7.68750300 | 0.04618300  | 0.26998600  |
| C | -7.87720900 | 1.34635900  | -0.18422400 |
| C | -6.77674600 | 2.13152100  | -0.50801700 |
| C | -5.49104500 | 1.61971200  | -0.38253000 |
| H | -4.62750200 | 2.22973800  | -0.62064800 |
| H | -6.24770900 | -1.47748100 | 0.76238600  |
| H | -8.54238800 | -0.56910700 | 0.53055500  |
| H | -8.88046400 | 1.74795400  | -0.28195500 |
| H | -6.91842500 | 3.14931400  | -0.85635700 |
| C | 2.21683400  | 1.79865200  | 2.61519900  |
| C | 3.33799100  | 0.87382300  | 2.23429300  |
| H | 2.24165900  | 2.03379900  | 3.68095800  |
| H | 2.29370500  | 2.73484800  | 2.04761700  |
| C | 4.01168900  | 1.04522300  | 1.02630800  |

|   |             |             |             |
|---|-------------|-------------|-------------|
| C | 4.98199400  | 0.13411800  | 0.62333700  |
| C | 5.28903200  | -0.95431900 | 1.42850300  |
| C | 4.63020700  | -1.12677700 | 2.64235600  |
| C | 3.66031600  | -0.21798300 | 3.04250000  |
| H | 3.77349800  | 1.89401200  | 0.39173500  |
| H | 5.48724500  | 0.27238200  | -0.32674300 |
| H | 6.03440600  | -1.67456300 | 1.10900800  |
| H | 4.86850600  | -1.97687500 | 3.27288500  |
| H | 3.13502700  | -0.36016100 | 3.98281800  |
| C | -0.02311300 | 2.05837700  | -1.58480500 |
| C | 1.40773900  | 2.53665900  | -1.64968700 |
| H | -0.60161300 | 2.54137500  | -2.37958500 |
| H | -0.05711900 | 0.97983400  | -1.76816200 |
| C | 2.35945400  | 1.81325000  | -2.36578700 |
| C | 3.66604200  | 2.27916500  | -2.46919400 |
| C | 4.03609600  | 3.46677800  | -1.84885700 |
| C | 3.09207700  | 4.18580200  | -1.12082400 |
| C | 1.78486100  | 3.72452300  | -1.02330700 |
| H | 1.04486800  | 4.27647400  | -0.45301800 |
| H | 2.08676200  | 0.87089900  | -2.83086300 |
| H | 4.39739200  | 1.70383600  | -3.02758100 |
| H | 5.05652200  | 3.82773300  | -1.92430900 |
| H | 3.37566800  | 5.11104900  | -0.62945200 |
| S | 1.75425100  | -2.03424200 | -1.13527500 |
| C | 0.47740100  | -3.37475500 | -1.37312400 |
| F | 0.10218000  | -3.86628700 | -0.20687500 |
| F | -0.57997000 | -2.87826100 | -2.00105500 |
| F | 1.01462800  | -4.33491600 | -2.10644200 |
| O | 0.84579900  | -0.88009900 | -0.52382000 |
| O | 2.13269100  | -1.60823600 | -2.45533800 |
| O | 2.70326500  | -2.51221300 | -0.16479400 |

**Glc-6B-OTf**

**Charge=0, Multiplicity=+1**

|   |             |             |            |
|---|-------------|-------------|------------|
| C | -0.44848000 | -0.25620800 | 1.88793900 |
| C | -1.85671900 | -0.82486200 | 2.02296000 |
| C | -2.55955100 | -0.09418700 | 3.20462000 |
| O | -1.77602700 | -2.20536100 | 2.28703600 |

|   |             |             |             |
|---|-------------|-------------|-------------|
| H | -2.40799300 | -0.61687500 | 1.10229000  |
| O | -1.62903400 | 0.67136200  | 3.94635500  |
| C | -1.40049500 | 1.74965900  | 3.05079600  |
| C | -0.52844300 | 1.26351400  | 1.90214200  |
| O | 0.86007700  | 1.69506000  | 2.03900300  |
| H | -0.88406700 | 1.62318300  | 0.93568700  |
| O | 0.24651800  | -0.57331800 | 0.71722600  |
| H | 0.12074800  | -0.58063500 | 2.77009000  |
| C | -2.82471400 | 2.06026800  | 2.55509800  |
| H | -0.93228500 | 2.57187800  | 3.59227400  |
| O | -3.51223400 | 0.82869600  | 2.75001500  |
| H | -2.85574000 | 2.34312400  | 1.49970500  |
| H | -3.30020400 | 2.82920900  | 3.16896500  |
| H | -3.02879300 | -0.82224400 | 3.86676000  |
| C | -2.61046300 | -3.02717600 | 1.46548600  |
| C | -1.92427200 | -3.42517600 | 0.19036300  |
| H | -3.55406900 | -2.50852200 | 1.26027300  |
| H | -2.83157000 | -3.91055700 | 2.06913800  |
| C | -1.93433700 | -2.58758600 | -0.92534400 |
| C | -1.20734400 | -2.92113400 | -2.06191800 |
| C | -0.47189700 | -4.10033900 | -2.09771800 |
| C | -0.46780700 | -4.95027200 | -0.99640500 |
| C | -1.19035200 | -4.61125200 | 0.14122100  |
| H | -2.48708000 | -1.65301800 | -0.91223900 |
| H | -1.20978500 | -2.23689400 | -2.90247200 |
| H | 0.10109500  | -4.35600900 | -2.98310800 |
| H | 0.10075400  | -5.87436200 | -1.02234300 |
| H | -1.17963000 | -5.26761400 | 1.00728600  |
| C | 1.78828200  | -1.07842000 | -1.57635900 |
| C | 2.13870600  | -1.55875600 | -0.31375400 |
| C | 3.46511900  | -1.89497700 | -0.05400800 |
| C | 4.43368700  | -1.76509500 | -1.04331400 |
| C | 4.08221600  | -1.28461700 | -2.29961100 |
| C | 2.75932200  | -0.93823300 | -2.55983900 |
| H | 3.74478200  | -2.25914100 | 0.93094400  |
| H | 5.46346800  | -2.03315200 | -0.82948700 |
| H | 4.83584900  | -1.18265800 | -3.07422600 |
| H | 2.47313300  | -0.56109000 | -3.53649700 |

|   |             |             |             |
|---|-------------|-------------|-------------|
| C | 2.93748200  | 1.68127200  | 0.94607400  |
| C | 3.56836800  | 1.71958100  | -0.30715000 |
| C | 4.95031700  | 1.70878400  | -0.37458100 |
| C | 5.69433200  | 1.65841000  | 0.79935800  |
| C | 5.07007000  | 1.61655800  | 2.04931200  |
| C | 3.69292500  | 1.62604900  | 2.12995700  |
| H | 2.96188700  | 1.73394300  | -1.20645400 |
| H | 5.44649500  | 1.72487200  | -1.33750400 |
| H | 6.77816000  | 1.64356200  | 0.74570800  |
| H | 5.66907000  | 1.57171500  | 2.95182100  |
| H | 3.18626400  | 1.58426100  | 3.08756000  |
| C | 1.09450600  | -1.71690700 | 0.75070900  |
| H | 0.49309900  | -2.61562000 | 0.58237000  |
| H | 1.56434900  | -1.80227800 | 1.73956200  |
| C | 1.51661200  | 1.65074300  | 0.94031400  |
| H | 0.95311200  | 1.65373900  | -0.00148000 |
| H | 0.76093500  | -0.80560800 | -1.79299800 |
| S | -1.44964900 | 1.29787000  | -1.73976100 |
| O | -2.36286700 | 0.95291700  | -0.63870800 |
| O | -1.13377000 | 0.21886500  | -2.67097700 |
| O | -0.28493700 | 2.09967600  | -1.30122400 |
| C | -2.42439700 | 2.51547700  | -2.74805200 |
| F | -1.70233300 | 2.96446900  | -3.77197800 |
| F | -2.78169800 | 3.55978100  | -1.99828700 |
| F | -3.52768500 | 1.94763900  | -3.22696300 |

### Glc-4B-OTf

Charge=0, Multiplicity=+1

|   |             |             |             |
|---|-------------|-------------|-------------|
| C | 0.73767200  | 0.83747300  | -2.80581000 |
| O | 0.96370900  | -0.50748800 | -2.39101800 |
| C | -0.64171500 | 0.72774300  | -3.48662400 |
| H | 1.48170400  | 1.10350500  | -3.56803800 |
| C | 0.90655600  | 1.76151200  | -1.62552400 |
| C | -1.74669000 | 0.48570500  | -2.45564100 |
| C | -1.37668200 | -0.94099000 | -1.96208500 |
| H | -2.71480000 | 0.41484000  | -2.96938200 |
| O | -1.74237300 | 1.51628300  | -1.51332200 |
| C | -0.17293100 | -1.22270100 | -2.87082400 |

|   |             |             |             |
|---|-------------|-------------|-------------|
| H | -1.08997200 | -0.94174700 | -0.90593500 |
| O | -2.41956200 | -1.84183100 | -2.25342400 |
| O | -0.50377000 | -0.56077300 | -4.07306500 |
| H | -0.84597600 | 1.48328000  | -4.24199000 |
| H | 0.07998300  | -2.26614400 | -3.04046700 |
| C | -2.74986900 | -2.75124200 | -1.20760100 |
| C | -3.46124300 | -2.06590300 | -0.07468900 |
| H | -1.85116500 | -3.26036400 | -0.84027800 |
| H | -3.39388600 | -3.49561800 | -1.68232200 |
| C | -4.73203900 | -1.52228600 | -0.27598700 |
| C | -5.35205000 | -0.79559600 | 0.73049500  |
| C | -4.70642800 | -0.60070400 | 1.95044300  |
| C | -3.45007900 | -1.15230800 | 2.16378400  |
| C | -2.83482800 | -1.88768900 | 1.15513100  |
| H | -5.22336400 | -1.65521100 | -1.23577000 |
| H | -6.33809400 | -0.37293000 | 0.56498600  |
| H | -5.18494600 | -0.01726200 | 2.73028200  |
| H | -2.92697000 | -1.00702100 | 3.10260500  |
| H | -1.85096100 | -2.30330000 | 1.33789300  |
| C | -2.81037000 | 1.45358200  | -0.56946800 |
| C | -2.57104800 | 2.49236200  | 0.48001100  |
| H | -2.84022300 | 0.46033000  | -0.11362300 |
| H | -3.76328200 | 1.62186200  | -1.08851900 |
| C | -3.22332900 | 3.72140700  | 0.44029900  |
| C | -2.97421200 | 4.68394100  | 1.41304800  |
| C | -2.06437800 | 4.42177200  | 2.43069700  |
| C | -1.40758600 | 3.19519900  | 2.47442300  |
| C | -1.66071700 | 2.23324400  | 1.50525800  |
| H | -3.93501000 | 3.92373700  | -0.35530700 |
| H | -3.49225500 | 5.63694100  | 1.37793200  |
| H | -1.87212600 | 5.16968300  | 3.19333100  |
| H | -0.70328100 | 2.98163900  | 3.27220600  |
| H | -1.15159400 | 1.27445200  | 1.53769400  |
| O | 2.35229300  | 1.79113800  | -1.34304000 |
| H | 0.39166800  | 1.41210300  | -0.73529500 |
| H | 0.64481200  | 2.79340300  | -1.85242900 |
| C | 2.78539700  | 1.09392100  | -0.37326400 |
| C | 4.17946800  | 1.01961600  | -0.11624000 |

|   |             |             |             |
|---|-------------|-------------|-------------|
| H | 2.04723200  | 0.56473900  | 0.24705400  |
| C | 5.12596400  | 1.63753800  | -0.95774300 |
| C | 6.46578900  | 1.52480100  | -0.65959600 |
| C | 6.86842800  | 0.80299700  | 0.47024900  |
| C | 5.93786700  | 0.19421000  | 1.30384700  |
| C | 4.58539100  | 0.29372900  | 1.01735600  |
| H | 4.79107100  | 2.18777800  | -1.82954300 |
| H | 6.26425600  | -0.36020100 | 2.17600400  |
| H | 3.83158400  | -0.16388200 | 1.65697600  |
| H | 7.20850600  | 1.98995700  | -1.29760600 |
| H | 7.92664000  | 0.71881700  | 0.69651400  |
| S | 0.91499400  | -1.20177700 | 1.98148800  |
| C | 1.48379400  | -2.66004700 | 0.97570400  |
| O | -0.11429300 | -1.73652600 | 2.85734700  |
| O | 0.42906700  | -0.27795900 | 0.92757800  |
| O | 2.15626500  | -0.74138800 | 2.61406000  |
| F | 1.95587500  | -3.62936800 | 1.74968400  |
| F | 2.45710700  | -2.28704800 | 0.13414500  |
| F | 0.48246700  | -3.15962100 | 0.24288300  |

**Beta Mannosyl triflate**

**Charge=0, Multiplicity=+1**

|   |             |             |             |
|---|-------------|-------------|-------------|
| C | 0.90153700  | 0.69925900  | -0.38816700 |
| C | -0.06525500 | 1.48282800  | 0.47495500  |
| C | 0.46879900  | 0.70756600  | -1.84658800 |
| O | 2.18248500  | 1.28308600  | -0.32919100 |
| H | 0.95366300  | -0.34204800 | -0.04366300 |
| O | -0.80912600 | 0.10505300  | -2.05830400 |
| H | 0.43300900  | 1.74411400  | -2.20431500 |
| C | 1.50600800  | -0.07096700 | -2.64159100 |
| C | -1.62501600 | 0.00308200  | -0.97475800 |
| C | -1.52870400 | 1.14421400  | 0.02675500  |
| H | -1.93825900 | 2.01545500  | -0.50325800 |
| O | -2.36284100 | 0.78831200  | 1.09009700  |
| H | 0.11408300  | 2.54106500  | 0.26028300  |
| O | 0.14427400  | 1.38349600  | 1.85761900  |
| O | 2.78442800  | 0.48400400  | -2.42042500 |
| H | 1.30947900  | -0.01807000 | -3.71332600 |

|   |             |             |             |
|---|-------------|-------------|-------------|
| H | 1.47361600  | -1.12503000 | -2.32528800 |
| C | 3.10497100  | 0.51036300  | -1.04908500 |
| C | 4.48561700  | 1.07222200  | -0.87865800 |
| H | 3.05972900  | -0.52325500 | -0.65801400 |
| C | 4.76234300  | 2.00176200  | 0.11795300  |
| C | 6.05951700  | 2.47109200  | 0.29091500  |
| C | 7.08445600  | 2.01221000  | -0.52759900 |
| C | 6.80700100  | 1.08494600  | -1.52664100 |
| C | 5.51172600  | 0.61663900  | -1.70260000 |
| H | 3.95639300  | 2.35562100  | 0.74895800  |
| H | 6.26878000  | 3.19983300  | 1.06730800  |
| H | 8.09668900  | 2.37824500  | -0.39054200 |
| H | 7.60187700  | 0.72748800  | -2.17293700 |
| H | 5.28758400  | -0.09727200 | -2.48759200 |
| C | 0.15063300  | 0.09118400  | 2.45773000  |
| C | 1.44904200  | -0.66046000 | 2.30651200  |
| H | -0.68040800 | -0.51395200 | 2.09432500  |
| H | -0.03452700 | 0.29280300  | 3.51738100  |
| C | 2.67502800  | -0.00876600 | 2.42620800  |
| C | 1.43024100  | -2.03188200 | 2.05498300  |
| C | 2.61981300  | -2.73863400 | 1.91453200  |
| C | 3.83907500  | -2.07849600 | 2.01913400  |
| C | 3.86380900  | -0.71149600 | 2.27863500  |
| H | 2.68787500  | 1.06051600  | 2.60766700  |
| H | 4.76832000  | -2.62557600 | 1.89819400  |
| H | 4.81225100  | -0.18972300 | 2.35252600  |
| H | 0.47670400  | -2.54368200 | 1.96170500  |
| H | 2.59292900  | -3.80491700 | 1.71389400  |
| C | -3.02576500 | 1.87897600  | 1.71050800  |
| C | -4.04757100 | 2.50489400  | 0.79948100  |
| H | -2.29665100 | 2.62126600  | 2.05635700  |
| H | -3.50516100 | 1.44566800  | 2.59214400  |
| C | -4.14076400 | 3.88709200  | 0.66643300  |
| C | -5.09492900 | 4.45329300  | -0.17353900 |
| C | -5.86070400 | 2.25260300  | -0.77441500 |
| C | -5.95467700 | 3.63646000  | -0.89643900 |
| H | -3.46080500 | 4.52623100  | 1.22324200  |
| H | -6.69540900 | 4.07528700  | -1.55662900 |

|   |             |             |             |
|---|-------------|-------------|-------------|
| H | -5.15925100 | 5.53215900  | -0.26938500 |
| C | -4.91470600 | 1.68852100  | 0.07021100  |
| H | -4.83532400 | 0.60917700  | 0.16441800  |
| H | -6.53027600 | 1.61121000  | -1.33813300 |
| S | -2.38613300 | -2.28362100 | 0.18926500  |
| C | -1.90163300 | -3.65890700 | -0.96980400 |
| O | -1.27104300 | -1.23523700 | -0.24080200 |
| O | -3.70032300 | -1.84383100 | -0.20761900 |
| O | -2.08308200 | -2.73301800 | 1.51984900  |
| F | -2.70828500 | -4.68827300 | -0.77319000 |
| F | -2.01348400 | -3.24114300 | -2.22063900 |
| F | -0.65198900 | -4.02509800 | -0.73792400 |
| H | -2.65249000 | -0.11657000 | -1.31794100 |

**Man-6B-OTf**

**Charge=0, Multiplicity=+1**

|   |             |             |             |
|---|-------------|-------------|-------------|
| C | -0.63436000 | -1.07797600 | -0.78484900 |
| C | -1.98756500 | -0.42255700 | -1.04464700 |
| C | -1.78927600 | 0.79797200  | -2.01289000 |
| O | -2.84381600 | -1.39585600 | -1.58692500 |
| H | -2.36472800 | -0.05334200 | -0.08647200 |
| O | -0.41407700 | 0.97365400  | -2.29732800 |
| C | -0.14895700 | -0.18169000 | -3.06200300 |
| C | 0.09104400  | -1.33944100 | -2.09092300 |
| O | 1.53390900  | -1.49603100 | -1.82758500 |
| O | -0.71793700 | -2.27769200 | -0.06502600 |
| C | -1.44331900 | -0.34840000 | -3.89683300 |
| H | 0.73278100  | -0.00299300 | -3.68062700 |
| O | -2.36162300 | 0.52797100  | -3.26323000 |
| H | -1.81797900 | -1.37595900 | -3.87932600 |
| H | -1.30213500 | -0.01548400 | -4.92670100 |
| H | -2.17828100 | 1.73055600  | -1.61331800 |
| C | -4.21706500 | -1.12766000 | -1.37230100 |
| C | -4.59538600 | -1.20200500 | 0.08420600  |
| H | -4.74827500 | -1.89392000 | -1.94434600 |
| H | -4.49302200 | -0.15282700 | -1.79406400 |
| C | -4.13245600 | -2.26037400 | 0.86712500  |
| C | -4.47367100 | -2.34136500 | 2.20975200  |



|   |             |             |             |
|---|-------------|-------------|-------------|
| C | -5.28435900 | -1.36699900 | 2.78581300  |
| C | -5.74659700 | -0.31001300 | 2.01279700  |
| C | -5.39784500 | -0.22706700 | 0.66843100  |
| H | -3.48212000 | -3.00255600 | 0.41496900  |
| H | -4.10605200 | -3.16581400 | 2.81261800  |
| H | -5.54671000 | -1.42834100 | 3.83676600  |
| H | -6.36672000 | 0.46041200  | 2.45885300  |
| H | -5.74487200 | 0.61065900  | 0.06978200  |
| C | 1.82406600  | -2.87130100 | 1.43535600  |
| C | 0.87418500  | -1.88908500 | 1.73061900  |
| C | 1.27717200  | -0.73592900 | 2.39958600  |
| C | 2.60647500  | -0.56278900 | 2.77338900  |
| C | 3.54114400  | -1.54963600 | 2.48890900  |
| C | 3.14751000  | -2.70641900 | 1.81748600  |
| H | 0.55186000  | 0.03746200  | 2.62709600  |
| H | 2.89703700  | 0.35360200  | 3.27580500  |
| H | 4.57740600  | -1.42092400 | 2.78441300  |
| H | 3.87604800  | -3.48024000 | 1.59713200  |
| C | 3.52936000  | -0.70065500 | -0.90710500 |
| C | 4.28116900  | -1.83254100 | -1.27685700 |
| C | 5.62055200  | -1.88194200 | -0.96088000 |
| C | 6.21330000  | -0.81510300 | -0.27452700 |
| C | 5.47281400  | 0.29746600  | 0.10451800  |
| C | 4.12262200  | 0.36279000  | -0.20334000 |
| H | 3.79708000  | -2.64869400 | -1.80073200 |
| H | 6.21640400  | -2.74410400 | -1.23829700 |
| H | 7.26998000  | -0.86349900 | -0.03068700 |
| H | 5.94383700  | 1.10992000  | 0.64561200  |
| H | 3.50068900  | 1.20627700  | 0.08845700  |
| C | -0.56561100 | -2.09213000 | 1.33991200  |
| H | -0.95913200 | -3.00649800 | 1.79134800  |
| H | -1.17774000 | -1.25257500 | 1.68721100  |
| C | 2.14834400  | -0.57417400 | -1.19557300 |
| H | 1.51417300  | -3.76855100 | 0.90714100  |
| S | 0.48050400  | 2.35908200  | 1.00239500  |
| O | -0.71760300 | 1.51251700  | 0.88571200  |
| O | 1.54594500  | 1.99688800  | 0.03964300  |
| O | 0.94951900  | 2.61589500  | 2.35772600  |

|   |             |             |             |
|---|-------------|-------------|-------------|
| C | -0.10201700 | 4.00627400  | 0.36996600  |
| F | -1.04107300 | 4.50791400  | 1.16891300  |
| F | -0.62294100 | 3.88059000  | -0.85340600 |
| F | 0.90452300  | 4.87448900  | 0.30645700  |
| H | -0.07487200 | -0.32368800 | -0.22130600 |
| H | -0.17756600 | -2.30834100 | -2.50948500 |
| H | 1.62810600  | 0.34493500  | -0.88253600 |

**Man-4B-OTf**

**Charge=0, Multiplicity=+1**

|   |             |             |             |
|---|-------------|-------------|-------------|
| C | -0.07964700 | -0.55567400 | -2.07468500 |
| O | 0.62374900  | 0.02250500  | -3.17831100 |
| C | 0.40159600  | -2.02535200 | -2.10933800 |
| H | -1.15298400 | -0.52768900 | -2.28453400 |
| C | 0.19777400  | 0.21012300  | -0.80292900 |
| C | 1.83139200  | -2.15674800 | -1.56493300 |
| C | 2.59163500  | -1.26321700 | -2.60366500 |
| O | 2.04877200  | -1.71066800 | -0.26065600 |
| H | 2.13639800  | -3.20588400 | -1.67289100 |
| O | 0.66914100  | -2.17732900 | -3.50534800 |
| H | -0.33956700 | -2.73836700 | -1.76137600 |
| C | 1.45864200  | -1.01699700 | -3.62563100 |
| O | 3.03344600  | -0.04486100 | -2.08678200 |
| H | 3.41482700  | -1.81401400 | -3.07578900 |
| H | 1.75674000  | -0.83511700 | -4.65539900 |
| O | -0.63442200 | 1.42971200  | -0.83275200 |
| C | -2.44481000 | 2.64455200  | 0.02594300  |
| C | -3.50082900 | 2.59205600  | 0.95166400  |
| C | -4.40448600 | 3.63991400  | 1.00547300  |
| C | -4.25026700 | 4.72478400  | 0.14813800  |
| C | -3.19998500 | 4.77738200  | -0.77366100 |
| C | -2.29521200 | 3.73886700  | -0.84363700 |
| H | -3.59877100 | 1.71695100  | 1.58894600  |
| H | -5.22973500 | 3.61116800  | 1.70730100  |
| H | -4.95973600 | 5.54490100  | 0.19151500  |
| H | -3.10148500 | 5.63202600  | -1.43310400 |
| H | -1.47416300 | 3.75261200  | -1.55174400 |
| C | 4.27921800  | -0.10725600 | -1.40018600 |

|   |             |             |             |
|---|-------------|-------------|-------------|
| C | 4.38060300  | 1.10132900  | -0.51925800 |
| H | 5.09844700  | -0.12869200 | -2.13251400 |
| H | 4.32362700  | -1.01645100 | -0.79251600 |
| C | 3.69651300  | 1.12800200  | 0.69698900  |
| C | 5.11406700  | 2.21794400  | -0.90969100 |
| C | 5.16844100  | 3.34626100  | -0.09788700 |
| C | 4.48499900  | 3.36543000  | 1.11214100  |
| C | 3.74918200  | 2.25257800  | 1.50925900  |
| H | 3.12912800  | 0.25706700  | 1.00629400  |
| H | 5.64551400  | 2.20422000  | -1.85697300 |
| H | 5.74557300  | 4.21037000  | -0.41061600 |
| H | 4.53071500  | 4.24380600  | 1.74790000  |
| H | 3.22234200  | 2.25284400  | 2.45826800  |
| C | 1.79030800  | -1.94351000 | 2.06833000  |
| C | 0.73373300  | -1.28837100 | 2.69829800  |
| C | 0.94464300  | -0.59242300 | 3.88337600  |
| C | 2.21498100  | -0.54379800 | 4.44623700  |
| C | 3.27250200  | -1.20413500 | 3.82828200  |
| C | 3.05822900  | -1.90222700 | 2.64692600  |
| H | -0.26135000 | -1.33362700 | 2.26778000  |
| H | 0.11052600  | -0.09609100 | 4.36857300  |
| H | 2.38028300  | -0.00195100 | 5.37189000  |
| H | 4.26405000  | -1.17443500 | 4.26775300  |
| H | 3.88439000  | -2.41371700 | 2.16099600  |
| S | -2.88622200 | -1.79536300 | 0.95105400  |
| C | -4.09459000 | -1.33240600 | -0.38637400 |
| F | -5.25971700 | -0.94315100 | 0.12182100  |
| F | -3.60212800 | -0.30014500 | -1.10589800 |
| F | -4.30816800 | -2.33969100 | -1.22155500 |
| O | -3.49307200 | -2.91432100 | 1.64095300  |
| O | -1.66216400 | -2.07300600 | 0.17617700  |
| O | -2.78010800 | -0.53373300 | 1.72155200  |
| C | 1.58171000  | -2.61510300 | 0.74577300  |
| H | 0.51987700  | -2.83620700 | 0.59470900  |
| H | 2.15557200  | -3.55007400 | 0.67896200  |
| H | 1.22258500  | 0.56850000  | -0.76224000 |
| H | -0.08745500 | -0.35613600 | 0.08002600  |
| C | -1.56931900 | 1.52510200  | 0.01082700  |

|   |             |            |            |
|---|-------------|------------|------------|
| H | -1.73453600 | 0.71762600 | 0.73925500 |
|---|-------------|------------|------------|

**Gal-oxo-OTf**

**Charge=0, Multiplicity=+1**

|   |             |             |             |
|---|-------------|-------------|-------------|
| C | -0.59471500 | -1.32477200 | 0.87236300  |
| C | 0.76916400  | -1.39209200 | 0.20714900  |
| C | 0.67084000  | -1.21095500 | -1.28808400 |
| O | 1.32957000  | -2.66933300 | 0.47954800  |
| H | 1.39185300  | -0.57493800 | 0.58365500  |
| O | -0.29980800 | -2.19345600 | -1.85326300 |
| H | 0.30548600  | -0.22694100 | -1.59380600 |
| C | 1.99631300  | -1.49642000 | -1.94114900 |
| C | -1.23997600 | -2.64380200 | -1.15818300 |
| C | -1.43904900 | -2.45903300 | 0.31140000  |
| H | -1.02251100 | -3.39189000 | 0.73061800  |
| O | -2.79825400 | -2.48453600 | 0.62122900  |
| H | -1.02984300 | -0.35500100 | 0.60851700  |
| O | -0.51654400 | -1.48476300 | 2.25790700  |
| H | -1.87118700 | -3.36339800 | -1.67461000 |
| O | 2.53859500  | -2.72726400 | -1.50142600 |
| H | 2.64949100  | -0.64824000 | -1.69967300 |
| H | 1.89666300  | -1.56278400 | -3.02478600 |
| C | 2.60402600  | -2.83412900 | -0.10090700 |
| C | 3.63522900  | -1.91218400 | 0.52143600  |
| H | 2.86650500  | -3.87733800 | 0.08890700  |
| C | 4.75779800  | -1.52057900 | -0.20283900 |
| C | 5.71989600  | -0.70779500 | 0.38421200  |
| C | 5.56931700  | -0.28760100 | 1.70025100  |
| C | 4.45692000  | -0.68951200 | 2.43084000  |
| C | 3.49438200  | -1.50174400 | 1.84580800  |
| H | 4.87167000  | -1.85176500 | -1.22980500 |
| H | 6.58651700  | -0.39784800 | -0.19004300 |
| H | 6.31623700  | 0.35411400  | 2.15521400  |
| H | 4.33454500  | -0.36399900 | 3.45845400  |
| H | 2.62115700  | -1.81409100 | 2.40979700  |
| C | -0.48323400 | -0.24702800 | 2.97916900  |
| C | -1.98255700 | 1.61393500  | 2.19726000  |
| C | -1.81625400 | 0.44541600  | 2.93785000  |

|   |             |             |             |
|---|-------------|-------------|-------------|
| C | -2.92014600 | -0.12081600 | 3.57969000  |
| C | -4.17097100 | 0.47141500  | 3.47600900  |
| C | -4.33347200 | 1.63222900  | 2.72122500  |
| H | -0.21691300 | -0.53370200 | 3.99862400  |
| H | 0.29852200  | 0.40706500  | 2.57801900  |
| H | -2.79606000 | -1.03840000 | 4.14726200  |
| H | -5.02355200 | 0.02776300  | 3.98027600  |
| C | -3.23931100 | 2.20230400  | 2.08262100  |
| H | -1.13174900 | 2.05249700  | 1.68779900  |
| H | -5.31386600 | 2.08984100  | 2.63529300  |
| H | -3.35077000 | 3.10052000  | 1.48458100  |
| C | -3.50990700 | -1.29526800 | 0.24023400  |
| C | -3.26143300 | -0.93527000 | -1.19536200 |
| H | -3.24219800 | -0.46668800 | 0.89992200  |
| H | -4.55706900 | -1.54601500 | 0.41715700  |
| C | -2.58815000 | 0.24342600  | -1.53186000 |
| C | -2.30549100 | 0.54001100  | -2.85875400 |
| C | -2.71758900 | -0.32793000 | -3.86564700 |
| C | -3.70588800 | -1.78184600 | -2.22495300 |
| C | -3.43285200 | -1.48049900 | -3.55160700 |
| H | -2.28737300 | 0.94590900  | -0.75907400 |
| H | -1.74469700 | 1.43834100  | -3.08940900 |
| H | -2.49273600 | -0.09699200 | -4.90165500 |
| H | -4.26889700 | -2.67600300 | -1.96957100 |
| H | -3.77978100 | -2.13949000 | -4.34057700 |
| C | 1.56901000  | 3.78172200  | -0.80267100 |
| S | 0.34016500  | 2.39095300  | -0.81168000 |
| F | 1.49961300  | 4.45628600  | 0.34279000  |
| F | 1.33243700  | 4.62501600  | -1.80364600 |
| F | 2.80775700  | 3.30823200  | -0.93594500 |
| O | 0.74696700  | 1.55981900  | 0.33745800  |
| O | 0.55955600  | 1.73417200  | -2.11161400 |
| O | -0.96280000 | 3.03802700  | -0.65808600 |

**Gal-6B-OTf**

**Charge=0, Multiplicity=+1**

|   |             |             |             |
|---|-------------|-------------|-------------|
| C | -1.13684000 | -1.36569600 | -0.47772800 |
| C | -0.26913200 | -1.56923400 | -1.71747600 |

|   |             |             |             |
|---|-------------|-------------|-------------|
| C | -0.73260300 | -2.73259900 | -2.58291100 |
| O | 1.11232600  | -1.83921600 | -1.31984400 |
| H | -0.27538300 | -0.65450100 | -2.31444200 |
| O | -2.02918500 | -2.37347600 | -3.01974100 |
| H | -0.08433800 | -2.85803800 | -3.45152700 |
| C | -0.99816300 | -4.03069400 | -1.81926500 |
| C | -2.80920100 | -2.65132100 | -1.87804000 |
| C | -2.63151700 | -1.54166200 | -0.83909400 |
| H | -3.12422800 | -1.85326600 | 0.09130000  |
| O | -3.25862100 | -0.42349400 | -1.40628300 |
| H | -0.95552400 | -0.35107700 | -0.10851900 |
| O | -0.77392500 | -2.32420900 | 0.49128400  |
| O | -2.34919800 | -3.88850100 | -1.39204900 |
| H | -3.85315200 | -2.72648200 | -2.18483000 |
| H | -0.34662500 | -4.15863500 | -0.95338100 |
| H | -0.92379400 | -4.89546300 | -2.48500800 |
| C | 1.81554600  | -0.86627000 | -0.89168400 |
| C | 3.15836900  | -1.06873100 | -0.49635300 |
| C | 3.73898500  | -2.35074300 | -0.43065600 |
| C | 5.05997000  | -2.47123000 | -0.06314800 |
| C | 5.80733200  | -1.32385200 | 0.23231900  |
| C | 3.90254500  | 0.08031700  | -0.17638800 |
| C | 5.23697600  | -0.05914800 | 0.17599500  |
| H | 5.52374600  | -3.44920600 | -0.00220700 |
| H | 6.85029300  | -1.42906600 | 0.51426900  |
| H | 3.42158400  | 1.05651800  | -0.21903500 |
| H | 5.82635300  | 0.81878800  | 0.41386200  |
| C | -0.78111300 | -1.83784400 | 1.83263000  |
| C | 0.53267600  | -1.20608900 | 2.20132000  |
| H | -0.96954300 | -2.71530200 | 2.45549400  |
| H | -1.60801300 | -1.13334500 | 1.97868600  |
| C | 1.62340700  | -2.01051000 | 2.54055700  |
| C | 2.84069000  | -1.44017100 | 2.88494000  |
| C | 2.98472600  | -0.05412700 | 2.88628700  |
| C | 1.91148200  | 0.75584000  | 2.53742300  |
| C | 0.69064200  | 0.17984200  | 2.20099300  |
| H | 1.50744200  | -3.09093400 | 2.54573200  |
| H | 2.01090000  | 1.83526700  | 2.51648200  |

|   |             |             |             |
|---|-------------|-------------|-------------|
| H | -0.14514800 | 0.82404300  | 1.95254400  |
| H | 3.67804000  | -2.07398900 | 3.15895200  |
| H | 3.93482200  | 0.39182500  | 3.16171500  |
| C | -3.16638400 | 0.81752900  | -0.71344500 |
| C | -3.52391000 | 0.74699900  | 0.74643400  |
| C | -2.78676400 | 1.48381300  | 1.67239500  |
| C | -3.10244100 | 1.42706600  | 3.02638700  |
| C | -4.14837700 | 0.62556600  | 3.46780800  |
| C | -4.58767600 | -0.03790800 | 1.19331300  |
| C | -4.89362500 | -0.10493800 | 2.54642800  |
| H | -1.96318600 | 2.10817300  | 1.33367300  |
| H | -2.52060500 | 2.00633400  | 3.73610800  |
| H | -4.38751500 | 0.57285500  | 4.52494500  |
| H | -5.17289600 | -0.60106100 | 0.47200300  |
| H | -5.71762000 | -0.72543900 | 2.88399900  |
| S | 0.69429700  | 2.72436300  | -0.38884700 |
| C | 0.30760800  | 4.07694300  | -1.60061100 |
| O | 0.10218800  | 1.52833400  | -1.04075100 |
| O | 0.01880800  | 3.12738300  | 0.84139200  |
| F | 0.78253400  | 5.24072300  | -1.17092000 |
| F | -1.01013400 | 4.18867000  | -1.75885200 |
| F | 0.85123800  | 3.80968700  | -2.78687200 |
| H | -2.16709700 | 1.24880100  | -0.83339400 |
| H | -3.86773600 | 1.46731800  | -1.24474900 |
| H | 3.13800600  | -3.22260800 | -0.66207800 |
| O | 2.15957700  | 2.68171300  | -0.33916200 |
| H | 1.35471000  | 0.13179400  | -0.87859600 |

**Gal-4B-OTf**

**Charge=0, Multiplicity=+1**

|   |             |            |             |
|---|-------------|------------|-------------|
| C | 0.04569900  | 1.40490700 | -1.51331300 |
| O | 0.06319600  | 2.82965400 | -1.52761800 |
| C | -1.31302200 | 1.09449700 | -2.16062900 |
| C | 1.19186000  | 0.85060800 | -2.31585100 |
| H | 0.09757400  | 1.02586000 | -0.48849000 |
| C | -2.37635000 | 1.39808500 | -1.09979300 |
| C | -2.30992800 | 2.94472100 | -1.08415800 |
| H | -2.10474700 | 0.93680800 | -0.14791700 |

|   |             |             |             |
|---|-------------|-------------|-------------|
| O | -3.67305900 | 1.01518000  | -1.48266500 |
| C | -1.18469200 | 3.18469000  | -2.10556500 |
| O | -2.05811900 | 3.63557500  | 0.11248700  |
| H | -3.25550500 | 3.29682800  | -1.51412500 |
| O | -1.42708200 | 2.19572700  | -3.07005600 |
| H | -1.39427700 | 0.14000200  | -2.67377900 |
| H | -1.11817900 | 4.17800700  | -2.54253900 |
| O | 2.45408600  | 1.19744100  | -1.65379300 |
| H | 1.26280200  | 1.31576300  | -3.29665100 |
| H | 1.12129500  | -0.23664100 | -2.36624400 |
| C | 2.86062200  | 0.43382500  | -0.72685700 |
| C | 4.05177900  | 0.72638900  | -0.01010500 |
| H | 2.31134400  | -0.48799200 | -0.48484100 |
| C | 4.46820100  | -0.23736900 | 0.92488200  |
| C | 5.61701700  | -0.00852200 | 1.66355200  |
| C | 6.33370500  | 1.16913900  | 1.47477500  |
| C | 5.91945200  | 2.12873000  | 0.54537500  |
| C | 4.78084700  | 1.91332400  | -0.20218400 |
| H | 3.87566600  | -1.14052300 | 1.04631000  |
| H | 5.95297600  | -0.74175700 | 2.38750800  |
| H | 7.23019400  | 1.34885900  | 2.05942200  |
| C | -2.21616100 | 2.95409000  | 1.34309200  |
| C | -0.99149500 | 2.16526600  | 1.73657000  |
| H | -3.09826100 | 2.30269800  | 1.33123600  |
| H | -2.40287100 | 3.74350300  | 2.07789700  |
| C | -1.10414400 | 0.84541400  | 2.16830100  |
| C | 0.02719300  | 0.10099000  | 2.48258200  |
| C | 1.28440600  | 0.68351700  | 2.38040600  |
| C | 0.27312000  | 2.74572800  | 1.64168400  |
| C | 1.40518000  | 2.00924200  | 1.96611500  |
| H | -2.08368800 | 0.38135500  | 2.23207100  |
| H | -0.07453500 | -0.93996200 | 2.76820000  |
| H | 2.16723200  | 0.10202300  | 2.62343800  |
| H | 0.36290900  | 3.76343800  | 1.27803600  |
| H | 2.38639900  | 2.46975200  | 1.89554700  |
| C | -3.93244000 | -0.36589500 | -1.27664600 |
| C | -3.96357600 | -0.74943800 | 0.17950200  |
| H | -4.90577400 | -0.53920300 | -1.74294400 |



|   |             |             |             |
|---|-------------|-------------|-------------|
| H | -3.19409300 | -0.98580100 | -1.80178900 |
| C | -3.13500500 | -1.75576100 | 0.66512100  |
| C | -3.16811100 | -2.11463000 | 2.00923500  |
| C | -4.02978000 | -1.45937300 | 2.87929300  |
| C | -4.85454500 | -0.44063900 | 2.40399500  |
| C | -4.82213100 | -0.08872200 | 1.06148100  |
| H | -2.43273500 | -2.24544000 | 0.00035700  |
| H | -2.49293500 | -2.88559600 | 2.36302600  |
| H | -4.05464400 | -1.73114700 | 3.92970000  |
| H | -5.52504100 | 0.07664200  | 3.08296600  |
| H | -5.46123400 | 0.70621000  | 0.68776200  |
| H | 6.49213000  | 3.04016800  | 0.41741700  |
| H | 4.43344600  | 2.64498200  | -0.92295100 |
| S | 0.61150700  | -2.53065200 | -0.00321500 |
| C | 0.74631500  | -3.98637400 | -1.14820500 |
| F | 1.36266500  | -5.00501500 | -0.55916300 |
| F | 1.44081100  | -3.65208000 | -2.24114500 |
| F | -0.46320900 | -4.38874800 | -1.53372000 |
| O | -0.15583000 | -3.02420300 | 1.13014500  |
| O | -0.04923400 | -1.51346700 | -0.84240500 |
| O | 2.02528500  | -2.20021300 | 0.27929700  |
